# Supplementary material for: Quantitative proteomic analysis of cultured skin fibroblast cells derived from patients with triglyceride deposit cardiomyovasculopathy
Source: PubMed Central journal article supplement (PMC3891998; doi:10.1186/1750-1172-8-197), 2013-12-21

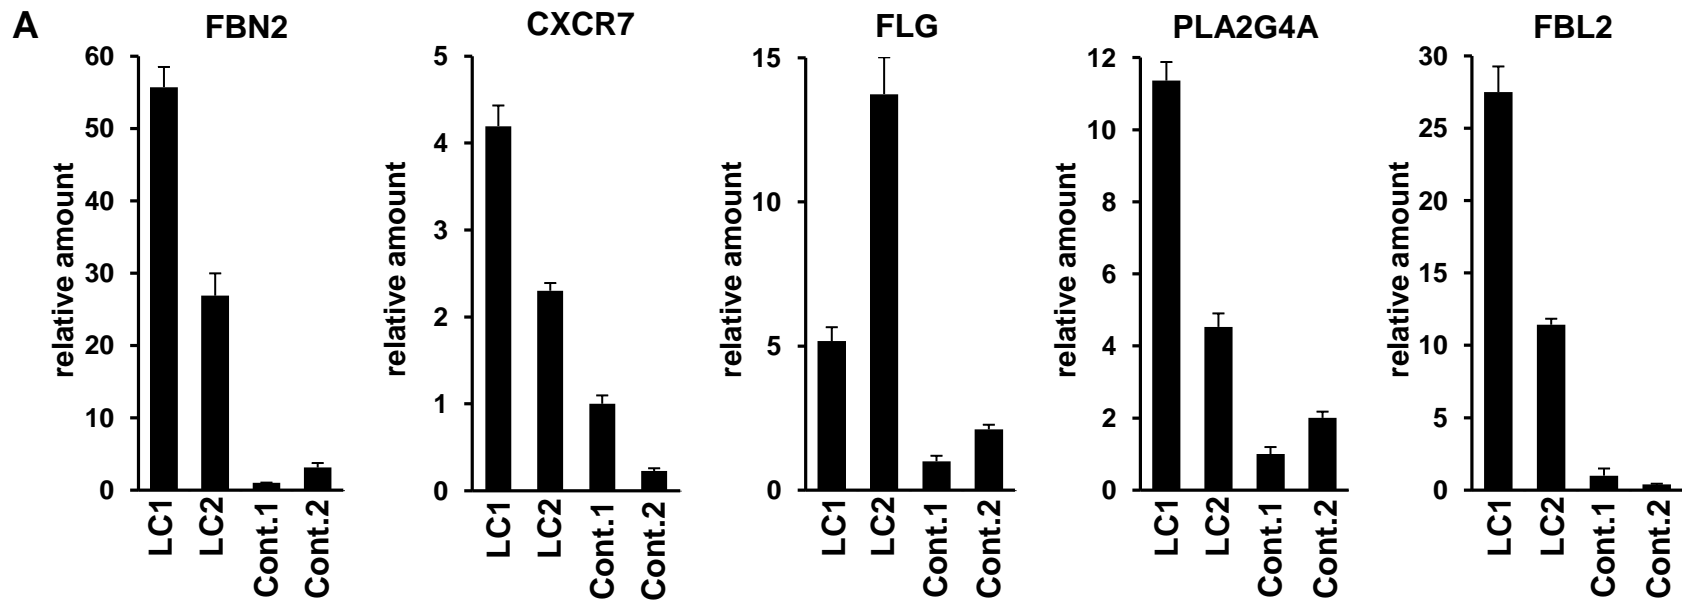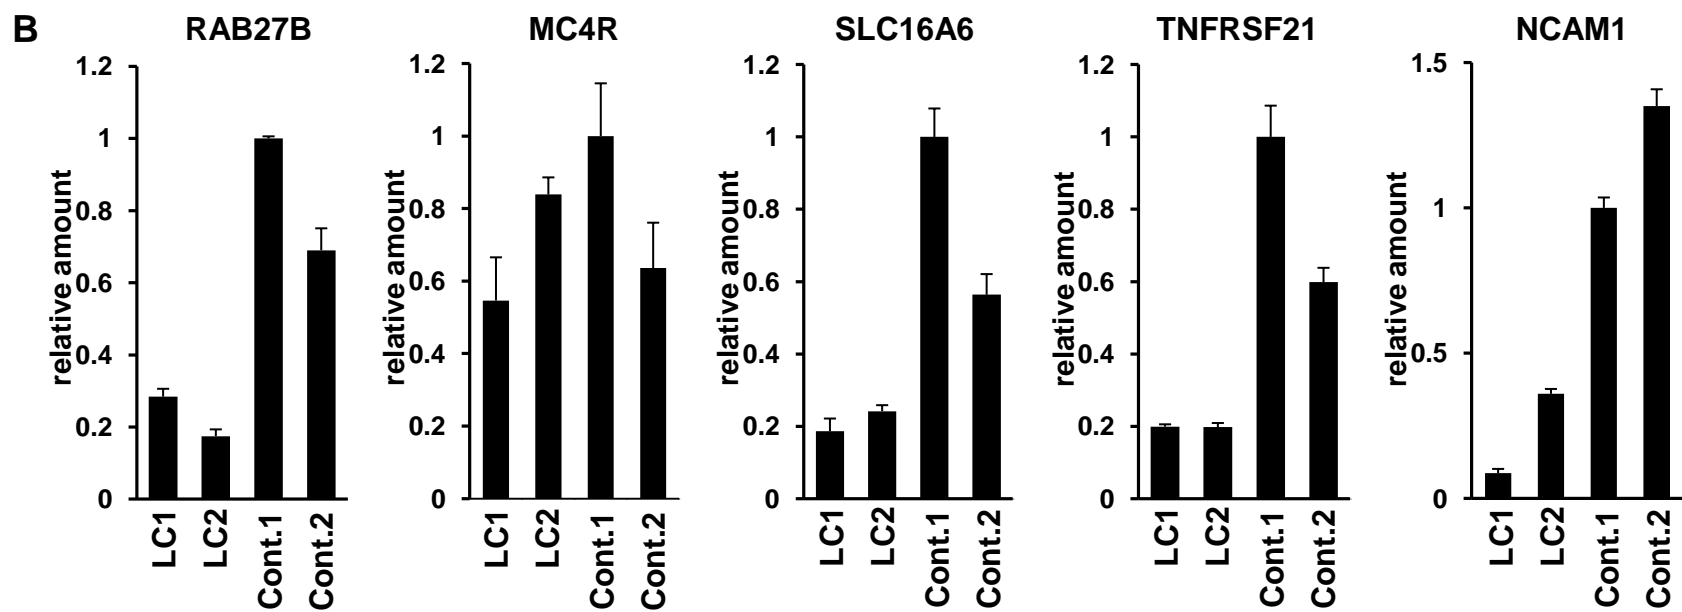

Supplement: 1750-1172-8-197-S8.pdf [file 1750-1172-8-197-S8.pdf]
