# Supplementary material for: Quantitative proteomic analysis of cultured skin fibroblast cells derived from patients with triglyceride deposit cardiomyovasculopathy
Source: Orphanet J Rare Dis. 2013 Dec 21;8:197. doi: 10.1186/1750-1172-8-197 (PMC3891998; doi:10.1186/1750-1172-8-197)
Supplement: Additional file 2: Table S2 — Networks of differentially expressed proteins in TGCV cells. [file 1750-1172-8-197-S2.xlsx]

## Sheet: Sheet1
Table S2. Networks of differentially expressed proteins in TGCV cells.
A. Significant networks of differentially expressed proteins in TGCV cells.
	Top 3 Functions	Score	#Focus Molecules	Molecules in Network
1	Dermatological Diseases and Conditions, Cancer, Renal and Urological System Development and Function	52	22	AKR1B1 (↓), ALDH3A2 (↓), ASS1 (↓), COL18A1 (↓), COL6A3 (↓), COL8A1 (↓), CRABP2 (↓), CSPG4 (↓), CTHRC1 (↑), DHCR24 (↓), DPP4 (↓), FABP3 (↓), FDFT1 (↓), GREM1 (↓), ITGA6 (↑), ITGA11 (↑), LAMB1 (↓), MET (↑), MME (↑), PON2 (↓), PTGS1 (↓), S100A4 (↓)
2	Cancer, Connective Tissue Disorders, Developmental Disorder	34	16	ARMC9 (↓), BAIAP2 (↑), DDX3Y (↑), EHD3 (↓), FLG (↑), GPNMB (↓), KCTD12 (↓), MRPS28 (↓), NNMT (↑), OGFR (↓), PLIN2 (↑), RPS4Y1 (↑), SQRDL (↓), TSC22D2 (↑), TTYH3 (↓), TUBA4A (↓)
B. Individual functions representing network1 of differentially expressed proteins.
Functions	Functions Annotation	p-Value	Molecules	Molecules
Dermatological Diseases and Conditions	burn	4.31e-06	4	COL18A1,COL6A3,COL8A1,PTGS1
Cancer	metastasis	6.13e-06	9	COL18A1,COL6A3,CRABP2,CTHRC1,FDFT1,ITGA6,MET,MME,S100A4
Renal and Urological System Development and Function	morphology of urinary system	1.37e-05	6	AKR1B1,COL18A1,GREM1,ITGA6,LAMB1,PTGS1
Dermatological Diseases and Conditions	ulcer	1.76e-05	4	COL18A1,COL6A3,COL8A1,PTGS1
Gastrointestinal Disease	ulcer	1.76e-05	4	COL18A1,COL6A3,COL8A1,PTGS1
C Significant networks of under-expressed proteins in TGCV cells.
	Top 3 Functions	Score	#Focus Molecules	Molecules in Network
1	Dermatological Diseases and Conditions, Gastrointestinal Disease, Organismal Injury and Abnormalities	46	19	AKR1B1 (↓), ALDH3A2 (↓), ASS1 (↓), COL18A1 (↓), COL6A3 (↓), COL8A1 (↓), CSPG4 (↓), DHCR24 (↓), DPP4 (↓), FABP3 (↓), FADS2 (↓) ,GREM1 (↓), LAMB1 (↓), PDE1C (↓), PON2 (↓), PRDX6 (↓), PTGS1 (↓), S100A4 (↓), TRPV2 (↓)
2	Cell Morphology, Cellular Compromise, Cellular Function and Maintenance	38	16	ACOX2 (↓), ARMC9 (↓), CRABP2 (↓), EHD3 (↓), FDFT1 (↓), GPNMB (↓), KCTD12 (↓), MRPS28 (↓), NME3 (↓), NT5DC3 (↓), NUDT2 (↓), OGFR (↓), SQRDL (↓), TST (↓), TTYH3 (↓), TUBA4A (↓)
D individual functions representing network1 of under-expressed proteins.
Functions	Functions Annotation	p-Value	# Molecules	Molecules
Dermatological Diseases and Conditions	ulcer	1.24e-08	5	COL18A1,COL6A3,COL8A1,FADS2,PTGS1
Gastrointestinal Disease	ulcer	1.24e-08	5	COL18A1,COL6A3,COL8A1,FADS2,PTGS1
Organismal Injury and Abnormalities	ulcer	1.24e-08	5	COL18A1,COL6A3,COL8A1,FADS2,PTGS1
Dermatological Diseases and Conditions	burn	9.85e-08	4	COL18A1,COL6A3,COL8A1,PTGS1
Connective Tissue Disorders	dupuytren contracture	2.88e-06	3	COL18A1,COL6A3,COL8A1
