# Supplementary material for: Quantitative proteomic analysis of cultured skin fibroblast cells derived from patients with triglyceride deposit cardiomyovasculopathy
Source: Orphanet J Rare Dis. 2013 Dec 21;8:197. doi: 10.1186/1750-1172-8-197 (PMC3891998; doi:10.1186/1750-1172-8-197)
Supplement: Additional file 3: Table S3 — Sequences and SRM transitions of target peptide for 20 proteins. [file 1750-1172-8-197-S3.xlsx]

## Sheet: Sheet1
Table S3. Sequences and SRM transitions of target peptides for 20 proteins.
a1st Quadrupole Mass filter, b3rd Quadrupole Mass filter, cCollision energy.
Accession number	Protein name	Peptide sequence	Q1a	Q3b	CEc	Retention time (min)
IPI00183666	TRPV2	EFSGLSHLSR[HeavyR]	381.532	385.243	18	19.89
				390.223	14	19.89
				433.739	14	19.89
				609.334	18	19.89
		EFSGLSHLSR	378.196	375.235	18	19.89
				385.219	14	19.89
				428.735	14	19.89
				599.325	18	19.89
		GILEASLELFK[HeavyK]	614.357	529.304	17	42.09
				744.438	19	42.09
				815.475	21	42.09
				944.517	19	42.09
		GILEASLELFK	610.35	525.297	17	42.09
				736.423	19	42.09
				807.461	21	42.09
				936.503	19	42.09
IPI00795922	MRPS28	AGGFASALER[HeavyR]	494.758	427.253	17	22.3
				585.322	19	22.3
				656.36	19	22.3
				860.45	21	22.3
		AGGFASALER	489.754	417.245	17	22.3
				575.314	19	22.3
				646.351	19	22.3
				850.441	21	22.3
		LLDLELTSR[HeavyR]	535.31	486.29	21	30.43
				615.333	19	30.43
				728.417	23	30.43
				843.444	21	30.43
		LLDLELTSR	530.306	476.282	21	30.43
				605.325	19	30.43
				718.409	23	30.43
				833.436	21	30.43
IPI00829927	ARMC9	DVPLLPSLDYEK[HeavyK]	698.876	447.232	32	35.34
				591.828	19	35.34
				859.428	23	35.34
				972.512	25	35.34
		DVPLLPSLDYEK	694.869	439.218	32	35.34
				587.821	19	35.34
				851.414	23	35.34
				964.498	25	35.34
		SVLQLLHSTSDVVR[HeavyR]	521.962	459.929	16	31.14
				568.818	18	31.14
				632.848	18	31.14
				689.39	18	31.14
		SVLQLLHSTSDVVR	518.626	456.593	16	31.14
				563.814	18	31.14
				627.843	18	31.14
				684.385	18	31.14
IPI00021458	EHD3	ELVNNLAEIYGR[HeavyR]	700.874	405.212	21	31.81
				647.338	23	31.81
				718.375	25	31.81
				1059.55	25	31.81
		ELVNNLAEIYGR	695.87	395.203	21	31.81
				637.33	23	31.81
				708.367	25	31.81
				1049.54	25	31.81
		EHQISPGDFPNLK[HeavyK]	497.256	448.242	16	24.45
				479.306	20	24.45
				626.375	20	24.45
				895.476	18	24.45
		EHQISPGDFPNLK	494.584	444.234	16	24.45
				471.292	20	24.45
				618.36	20	24.45
				887.462	18	24.45
IPI00783931	COL18A1	AVGLAGTFR[HeavyR]	451.26	490.264	16	22.42
				561.301	18	22.42
				674.385	18	22.42
				731.407	18	22.42
		AVGLAGTFR	446.256	480.256	16	22.42
				551.293	18	22.42
				664.377	18	22.42
				721.399	18	22.42
		LQDLYSIVR[HeavyR]	558.818	484.311	21	29.51
				647.375	21	29.51
				760.459	23	29.51
				875.486	21	29.51
		LQDLYSIVR	553.814	474.303	21	29.51
				637.366	21	29.51
				750.45	23	29.51
				865.477	21	29.51
IPI00942464	COL8A1	GGNVWVALFK[HeavyK]	549.813	486.316	19	38.96
				585.385	19	38.96
				771.464	17	38.96
				870.532	19	38.96
		GGNVWVALFK	545.806	478.302	19	38.96
				577.37	19	38.96
				763.45	17	38.96
				862.518	19	38.96
		NNEPVMYTYDEYK[HeavyK]	837.366	826.37	26	25.28
				989.434	26	25.28
				1120.47	28	25.28
				1316.6	24	25.28
		NNEPVMYTYDEYK	833.359	818.356	26	25.28
				981.419	26	25.28
				1112.46	28	25.28
				1308.58	24	25.28
IPI00298476	GREM1	FC[Carbamidomethyl]YGQC[Carbamidomethyl]NSFYIPR[HeavyR]	861.375	395.264	27	30.17
				558.327	29	30.17
				1066.5	31	30.17
				1251.58	29	30.17
		FC[Carbamidomethyl]YGQC[Carbamidomethyl]NSFYIPR	856.371	385.255	27	30.17
				548.319	29	30.17
				1056.49	31	30.17
				1241.57	29	30.17
		GSQGAIPPPDK[HeavyK]	537.787	367.206	29	10.72
				464.259	27	10.72
				561.312	17	10.72
				802.454	19	10.72
		GSQGAIPPPDK	533.78	359.192	29	10.72
				456.245	27	10.72
				553.298	17	10.72
				794.44	19	10.72
IPI00219684	FABP3	SLGVGFATR[HeavyR]	459.258	357.212	15	22.51
				561.301	17	22.51
				660.37	19	22.51
				717.391	19	22.51
		SLGVGFATR	454.253	347.203	15	22.51
				551.293	17	22.51
				650.362	19	22.51
				707.383	19	22.51
		WDGQETTLVR[HeavyR]	607.806	599.375	20	21.42
				728.417	22	21.42
				913.497	22	21.42
				1028.52	24	21.42
		WDGQETTLVR	602.801	589.366	20	21.42
				718.409	22	21.42
				903.489	22	21.42
				1018.52	24	21.42
IPI00465170	NT5DC3	HLHTLIFNAAR[HeavyR]	434.915	351.202	14	20.23
				441.244	18	20.23
				588.312	18	20.23
				701.396	16	20.23
		HLHTLIFNAAR	431.579	346.198	14	20.23
				431.236	18	20.23
				578.304	18	20.23
				691.388	16	20.23
		NNIDYEPVHLYK[HeavyK]	504.924	528.784	16	23.93
				586.297	16	23.93
				642.839	14	23.93
				764.454	20	23.93
		NNIDYEPVHLYK	502.253	524.777	16	23.93
				582.29	16	23.93
				638.832	14	23.93
				756.44	20	23.93
IPI00018953	DPP4	IISNEEGYR[HeavyR]	545.774	405.212	27	13.48
				534.254	25	13.48
				864.372	19	13.48
				977.456	21	13.48
		IISNEEGYR	540.77	395.203	27	13.48
				524.246	25	13.48
				854.363	19	13.48
				967.447	21	13.48
		LGTFEVEDQIEAAR[HeavyR]	794.398	697.386	35	29.61
				812.413	29	29.61
				941.456	29	29.61
				1040.52	29	29.61
		LGTFEVEDQIEAAR	789.394	687.378	35	29.61
				802.405	29	29.61
				931.447	29	29.61
				1030.52	29	29.61
IPI00304895	MOCOS	LTHDTVEQVR[HeavyR]	604.319	497.253	22	11.23
				547.777	24	11.23
				741.412	26	11.23
				856.439	26	11.23
		LTHDTVEQVR	599.315	492.249	22	11.23
				542.773	24	11.23
				731.404	26	11.23
				846.431	26	11.23
		VSTYDC[Carbamidomethyl]GEK[HeavyK]	533.734	501.221	25	19.54
				616.248	21	19.54
				779.312	19	19.54
				880.359	19	19.54
		VSTYDC[Carbamidomethyl]GEK	529.727	493.207	25	19.54
				608.234	21	19.54
				771.297	19	19.54
				872.345	19	19.54
IPI00302740	RPS4Y1	VNDTVQIDLGTGK[HeavyK]	684.366	483.301	30	24.16
				598.328	22	24.16
				711.412	24	24.16
				839.471	22	24.16
		VNDTVQIDLGTGK	680.359	475.287	30	24.16
				590.314	22	24.16
				703.398	24	24.16
				831.457	22	24.16
		LTVAEER[HeavyR]	414.228	443.212	15	12.06
				514.249	17	12.06
				613.317	17	12.06
				714.365	17	12.06
		LTVAEER	409.224	433.204	15	12.06
				504.241	17	12.06
				603.309	17	12.06
				704.357	17	12.06
IPI00303258	LMCD1	GLLENELK[HeavyK]	462.268	377.215	15	23.88
				511.296	19	23.88
				640.339	17	23.88
				753.423	17	23.88
		GLLENELK	458.261	373.208	15	23.88
				503.282	19	23.88
				632.325	17	23.88
				745.409	17	23.88
		YSTLTAR[HeavyR]	411.223	357.212	17	12.14
				470.296	17	12.14
				571.343	17	12.14
				658.375	17	12.14
		YSTLTAR	406.219	347.203	17	12.14
				460.287	17	12.14
				561.335	17	12.14
				648.367	17	12.14
IPI00293616	DDX3Y	QSSGSSSSGFGASR[HeavyR]	656.294	691.339	24	12.38
				778.371	24	12.38
				865.403	26	12.38
				1096.49	24	12.38
		QSSGSSSSGFGASR	651.289	681.331	24	12.38
				768.363	24	12.38
				855.395	26	12.38
				1086.48	24	12.38
		VGNLGLATSFFNEK[HeavyK]	752.898	779.381	24	36.03
				880.429	24	36.03
				951.466	24	36.03
				1121.57	26	36.03
		VGNLGLATSFFNEK	748.891	771.367	24	36.03
				872.414	24	36.03
				943.451	24	36.03
				1113.56	26	36.03
IPI00215613	ITGA11	DVVEAASHIEQR[HeavyR]	455.233	461.242	16	19.35
				525.764	14	19.35
				555.312	22	19.35
				575.298	16	19.35
		DVVEAASHIEQR	451.897	456.238	16	19.35
				520.759	14	19.35
				545.304	22	19.35
				570.294	16	19.35
		FGSSIASVR[HeavyR]	467.255	442.264	19	18.43
				642.38	19	18.43
				729.412	19	18.43
				786.434	21	18.43
		FGSSIASVR	462.251	432.256	19	18.43
				632.372	19	18.43
				719.404	19	18.43
				776.426	21	18.43
IPI00010697	ITGA6	LPNAGTQVR[HeavyR]	483.274	426.731	19	12.83
				570.323	21	12.83
				641.36	23	12.83
				755.403	21	12.83
		LPNAGTQVR	478.27	421.727	19	12.83
				560.315	21	12.83
				631.352	23	12.83
				745.395	21	12.83
		TITVTPNR[HeavyR]	456.263	396.222	20	13.29
				497.27	18	13.29
				596.338	18	13.29
				697.386	18	13.29
		TITVTPNR	451.263	386.214	20	13.29
				487.262	18	13.29
				586.33	18	13.29
				687.378	18	13.29
IPI00103467	ALDH1B1	YGLAAAVFTR[HeavyR]	539.8	532.311	19	29.64
				603.348	19	29.64
				674.385	21	29.64
				745.423	21	29.64
		YGLAAAVFTR	534.795	522.303	19	29.64
				593.34	19	29.64
				664.377	21	29.64
				735.414	21	29.64
		LLNLLADLVER[HeavyR]	639.886	526.322	31	43.76
				712.386	21	43.76
				825.47	23	43.76
				1052.6	23	43.76
		LLNLLADLVER	634.882	516.314	31	43.76
				702.378	21	43.76
				815.462	23	43.76
				1042.59	23	43.76
IPI00026256	FLG	HSASQEGQDTIR[HeavyR]	669.817	399.258	34	8.77
				699.365	30	8.77
				1114.54	26	8.77
				1201.57	28	8.77
		HSASQEGQDTIR	664.813	389.25	34	8.77
				689.357	30	8.77
				1104.53	26	8.77
				1191.56	28	8.77
		HTQTSSGGQAASSHEQAR[HeavyR]	617.285	513.265	28	5.69
				737.356	28	5.69
				824.388	26	5.69
				895.425	28	5.69
		HTQTSSGGQAASSHEQAR	613.949	503.257	28	5.69
				727.348	28	5.69
				814.38	26	5.69
				885.417	28	5.69
IPI00060423	CTHRC1	GDASTGWNSVSR[HeavyR]	623.788	758.381	24	16.08
				815.403	24	16.08
				916.451	24	16.08
				1003.48	24	16.08
		GDASTGWNSVSR	618.784	748.373	24	16.08
				805.395	24	16.08
				906.442	24	16.08
				993.474	24	16.08
		ESFEESWTPNYK[HeavyK]	762.84	529.286	23	25.87
				630.333	23	25.87
				816.413	23	25.87
				903.445	25	25.87
		ESFEESWTPNYK	758.833	521.271	23	25.87
				622.319	23	25.87
				808.398	23	25.87
				895.43	25	25.87
		DGSPGANGIPGTPGIPGR[HeavyR]	815.414	606.359	27	21.31
				685.874	25	21.31
				861.481	29	21.31
				1031.59	33	21.31
		DGSPGANGIPGTPGIPGR	810.41	596.351	27	21.31
				680.87	25	21.31
				851.473	29	21.31
				1021.58	33	21.31
IPI00293307	PLIN2	EVSDSLLTSSK[HeavyK]	587.308	430.238	19	18.89
				543.322	19	18.89
				743.438	21	18.89
				945.497	21	18.89
		EVSDSLLTSSK	583.301	422.224	19	18.89
				535.308	19	18.89
				735.424	21	18.89
				937.483	21	18.89
		SVVSGSINTVLGSR[HeavyR]	693.385	442.264	22	26.38
				600.334	22	26.38
				756.423	26	26.38
				1100.59	26	26.38
		SVVSGSINTVLGSR	688.381	432.256	22	26.38
				595.33	22	26.38
				746.415	26	26.38
				1090.59	26	26.38
		SQQTISQLHSTVHLIEFAR[HeavyR]	552.047	621.343	17	29.46
				645.359	23	29.46
				664.03	17	29.46
				824.445	19	29.46
		SQQTISQLHSTVHLIEFAR	549.545	618.007	17	29.46
				635.351	23	29.46
				660.693	17	29.46
				819.441	19	29.46
