# Supplementary material for: Quantitative proteomic analysis of cultured skin fibroblast cells derived from patients with triglyceride deposit cardiomyovasculopathy
Source: Orphanet J Rare Dis. 2013 Dec 21;8:197. doi: 10.1186/1750-1172-8-197 (PMC3891998; doi:10.1186/1750-1172-8-197)
Supplement: Additional file 4: Table S4 — A list of identified and quantified transcripts by Human Genome U133 Plus 2.0 array. [file 1750-1172-8-197-S4.xlsx]

## Sheet: (1-1)MSA40+YT41 vs LC1(26780gen
Table S4. A list of identified and quantified transcripts by Human Genome U133 Plus 2.0 array.
Gene Symbol	LC1 ratio normalized	LC2 ratio normalized	SwissProt	Probe Set ID
SDCCAG1	0.8	0.82	A0JLQ3 /// B3KSK1 /// B4DDL3 /// B4DHA9 /// B4E3F3 /// O60524 /// Q32Q66	1558675_s_at
BANK1	0.94	1.21		1558662_s_at
LOC202051	0.9	1.01	B3KS04 /// B7Z296 /// Q5HYK7 /// Q6PJX8	1558641_at
ADAMTS5	0.49	0.41	B2R763 /// B7Z865 /// O43854 /// Q5D094 /// Q8N610	1558636_s_at
ZNF621	0.8	1.01	Q9UNA0	1558620_at
	0.88	0.97		1558606_s_at
	0.51	0.61	B4DR23 /// Q8NEK5	1558605_at
UNQ6228	0.78	0.81		1558569_at
C4orf12	3.19	1.25		1562953_s_at
SLC2A11	1.01	0.91		1558540_s_at
	2.52	3.41	Q59HF0 /// Q9UKG4	1558529_s_at
	0.71	0.99		1558522_at
LRRC8C	1.18	0.95	Q6X854	1558517_s_at
	0.6	0.95	B2RAY5 /// Q15K36 /// Q8TCT9	1558515_at
FAM62B	0.99	1.22	B4DV35 /// P24855 /// Q14UU9 /// Q14UV0	1558511_s_at
C1orf53	0.83	0.92	B4DJP5 /// B4E2T0 /// B5MCM1 /// B5MCM7 /// B7Z6F0 /// B7Z9H2 /// B7Z9T4 /// Q496K8 /// Q496L1 /// Q504W2 /// Q542Y4 /// Q59G08 /// Q6P4C1 /// Q6PJ99 /// Q8TDC5 /// Q8WXF9 /// Q8WYM3 /// Q8WYM4 /// Q8WYM5 /// Q9BYW1	1558508_a_at
C1orf53	0.88	1.23	B4DSG8 /// Q08AG5 /// Q96JV1	1558507_at
DNM3	0.79	0.61	Q6P435 /// Q8ND77	1558501_at
TMED4	1.04	1.18	Q8N5W6	1558487_a_at
LRRC27	0.83	0.86		1558483_at
ABCC5	0.69	1.09		1558460_at
LOC401320	0.91	0.6	Q4G0W7 /// Q8TDW0	1558459_s_at
A2M	1.56	1.48		1558450_at
	0.92	1.04	A0FGR8 /// A6NFV7 /// A6NJB3	1558445_at
ORAI2	0.74	0.81	Q5VUE5	1558426_x_at
PLEKHG2	2.32	1.63	Q7Z7H5	1558407_at
	0.98	1	B3KUK5 /// B4DW88 /// Q5SZH7 /// Q9C0I9	1558401_at
AHNAK2	0.92	0.83		1558378_a_at
MPHOSPH9	0.87	1		1558369_at
LOC439911	0.84	0.75	B2R950 /// B7Z7M2 /// P01023 /// P20742 /// Q9BQ22	1558345_a_at
HOOK3	0.53	0.62	Q53TS8 /// Q8N7U5 /// Q96Q36	1558315_s_at
GIGYF2	1.07	0.91	Q9P0K9	1558305_at
KIAA1107	1.04	0.9		1558293_at
PIGW	1.1	1.06	B4DYK2 /// Q9H7P9	1558292_s_at
PVT1	0.99	0.89		1558290_a_at
KDSR	0.92	0.66		1558279_a_at
LOC148189	1.23	1.17	Q8IVF2	1558256_at
SRPK2	0.93	0.87		1558254_s_at
ZNF587	1.04	1.15	Q99550	1558253_x_at
ZNF587	0.84	0.91	B7ZKM6 /// B7ZKM7 /// Q05DB3 /// Q8NDD7 /// Q96NH6 /// Q9BZF9	1558251_a_at
	0.97	1.2	B2R5D2 /// Q14061	1558250_s_at
STX16	0.87	1.1	Q6ZSG8	1558249_s_at
	1.38	0.95	A8K192 /// B3KP10 /// B4DH68 /// Q155Q3 /// Q86SR7	1558237_x_at
	0.86	0.88	A8K192 /// B3KP10 /// B4DH68 /// Q155Q3 /// Q86SR7	1558236_at
ATF1	0.97	1.02	Q6ZVX9	1558233_s_at
C3orf55	0.98	1.07	Q86VS8	1558552_s_at
MUC20	1.26	1.5		1558220_at
UBTF	0.92	1.14	A6H8W4 /// B4DLU7 /// B4DRT8 /// B4DZM1 /// B9EG55 /// Q6Y7W6	1558215_s_at
CTNNA1	0.96	1.09	B4DYL8 /// Q9UPP5	1558214_s_at
	0.61	0.46	Q7Z7B1	1558208_at
LOC145783	0.97	1.12		1558202_at
SLC4A1AP	0.92	0.97	Q52LW3	1558201_s_at
FN1	0.63	1.28	B2R5Y1 /// B4DMX0 /// Q06136	1558199_at
LUZP1	0.73	0.7	A6NF09 /// A8MVX2 /// A8MW44 /// P78362	1558173_a_at
PEX13	0.65	0.95	B3KTM5 /// B4DR41 /// B4E1I5 /// Q92967 /// Q96SQ5 /// Q9NWJ2	1558163_at
LOC100131262	0.74	0.95	B3KTM5 /// B4DR41 /// B4E1I5 /// Q92967 /// Q96SQ5 /// Q9NWJ2	1558152_at
TNRC6B	1.08	1.13		1558142_at
TAF11	0.87	0.94	A6NGZ0 /// A6NN69 /// A8MPP0 /// A8MQ39 /// B4DJX9 /// B4E3U3 /// B7ZBN1 /// B7ZBN2 /// B7ZBN3 /// O14662 /// Q59G13 /// Q6GMS8 /// Q96JR6 /// Q96NX8	1558136_s_at
USP31	1.68	1.54		1558117_s_at
RECK	1.09	1.08		1558116_x_at
RECK	0.91	0.95	B2R8K4 /// B4DRF9 /// P18846	1558115_at
MBNL1	0.74	0.89	A8K485 /// B4DT19 /// Q13435 /// Q7L4T5 /// Q7Z3K9 /// Q7Z627 /// Q96CM6 /// Q9BWD2	1558111_at
	0.35	0.51	Q8N307	1558105_a_at
	1.92	1.42	A8K962 /// B4DLB0 /// B4DNQ1 /// P17480 /// Q05BZ1 /// Q8WYZ7 /// Q9BQR2	1558103_a_at
	1.41	1.26	B3KSR8 /// B4DKT9 /// B4DU00 /// B4E2G8 /// P35221 /// Q8N1C0	1558102_at
C22orf30	1.01	1.09	P12931 /// Q71UK5 /// Q76P87 /// Q9H7V3	1558097_at
C3orf19	0.98	1.02		1558094_s_at
MATR3	1.42	0.99		1558093_s_at
DNAJC3	0.79	0.95	B4DV74 /// Q9BWU0	1558080_s_at
	1.34	1.27	A6YID2 /// A6YID3 /// A6YID4 /// A6YID5 /// A6YID6 /// A6YID7 /// B4DN21 /// B4DTH2 /// B4DTK1 /// B4DU16 /// B7ZLE5 /// B7ZLF0 /// O95608 /// O95617 /// P02751 /// Q14328 /// Q564H7 /// Q59G22 /// Q5CZ99 /// Q68CX6 /// Q6MZF4 /// Q6MZM7 /// Q6MZS0 /// Q6N084 /// Q6PJE5 /// Q6STG2 /// Q7L553 /// Q7Z391 /// Q9H382 /// Q9UQS6	1558078_at
ANKRD32	0.55	0.78	P17021	1558076_at
	1.38	1.66	B2RCS1 /// B5MBY9 /// B5MCG5 /// B5MCX8 /// Q92968	1558048_x_at
EXOSC6	0.86	0.89	Q8NAM7	1558044_s_at
LOC647979	0.83	0.67	Q8NBT7	1558028_x_at
PRKAB2	0.82	1.01	A8MYY3 /// B0QY73 /// B0QYM5 /// B4DKJ5 /// B4E231 /// B5ME23 /// Q9UPQ9	1558027_s_at
RABEPK	0.71	0.62	B4DY18 /// Q15544	1558021_at
	0.73	1.9	A8K538 /// B4DLA0 /// B4DLU5 /// B4E3C4 /// B4E3E8 /// B5BTY4 /// O00571 /// Q59GX6 /// Q5S4N1	1558017_s_at
ACTR2	0.88	0.79	B3KS48 /// Q70CQ4	1558015_s_at
FAR1	0.9	0.86	A8K9D8 /// B2RCE6 /// B2RNS1 /// O95980 /// Q6P9E2	1558014_s_at
LOC100132832 /// PMS2L1 /// PMS2L2	1.05	1.31	A8K9D8 /// B2RCE6 /// B2RNS1 /// O95980 /// Q6P9E2	1557996_at
LOC641298	1.32	1.43	B4DLS5 /// B4E233 /// Q68DD0 /// Q86UV8 /// Q86UV9 /// Q86VM6 /// Q96P92 /// Q96RE3 /// Q9NR56	1557987_at
RPAP3	1.12	0.83	Q96ND1	1557984_s_at
MTERFD2	1.45	0.77		1557966_x_at
MTERFD2	1.12	0.59		1557965_at
LOC100127983	1.02	0.91		1557961_s_at
CXorf15	1.33	0.81	Q5THK1	1557954_at
ZKSCAN1	1.05	1.28	Q6PII3 /// Q9P0R4	1557953_at
SDCCAG1	0.87	0.89	A8MXP9 /// B3KM87 /// B4DF66 /// B4DRS1 /// B7ZAV5 /// P43243 /// Q5CZA7 /// Q68D11 /// Q68E03 /// Q9H4N1	1557950_at
PHLDB3	0.93	1.42	B7ZM22 /// Q69YN6 /// Q6TFL3 /// Q7Z3F8 /// Q8NCV3	1557948_at
TCTE3	1.38	0.98	A8KA82 /// Q13217	1557945_at
CTNND1	1.27	1.35		1557944_s_at
PTRF	0.82	1.07	Q13144 /// Q541Z1 /// Q59HD8	1557938_s_at
GSTO1	0.81	0.91		1557915_s_at
HSP90AB1	0.79	0.71	Q5RKV6	1557910_at
CD44	0.69	0.8		1557905_s_at
FLJ35934	1.78	1.53	A8K9V5 /// B4DH06 /// B4E214 /// O43741	1557895_at
C5orf28	0.91	1.13	B2RCP5 /// B4DHK9 /// B4DWQ5 /// P61160 /// Q8IY98	1557828_a_at
AFG3L2	0.88	0.83	B0AZV0 /// B2R5S5 /// B4DNJ6 /// Q9Y3F4	1557820_at
C11orf31	1.09	0.83	A8MST6 /// B7Z8H9 /// Q5JTV9 /// Q5JTW2	1557801_x_at
C11orf31	1.27	1.04	B4DRW9 /// Q9H6T3	1557799_at
LOC643401	1.22	0.41	A9JR72 /// Q86TR8 /// Q86XZ8 /// Q9Y5S2	1557765_at
LOC401068	0.78	0.85		1557754_at
	0.73	0.86	Q2KQ75 /// Q9NUQ3	1557751_at
EHBP1L1	1.02	1.19	B3KNP9 /// B3KRF7 /// P17029 /// Q7Z4R1	1557749_at
NKTR	0.98	0.82	B2RXH3 /// Q6NSJ2 /// Q96HZ0	1557737_s_at
LOC100131848	1.57	0.98	Q8IZS6	1557729_at
ZNF286A	0.72	0.94	B2R983 /// P78417 /// Q5TA01 /// Q5TA02	1557684_at
	1.28	0.7	A6NDN4 /// A8K309 /// B4DN59 /// B4E2X0 /// B6EAT9 /// O95370 /// O95658 /// O95659 /// P16070 /// Q86UZ1 /// Q99900 /// Q9H5A3 /// Q9H5A4 /// Q9H5A6 /// Q9H5A7 /// Q9P2Z2 /// Q9UCB0	1557667_at
TBC1D12	1.44	0.84		1557609_s_at
ATP6V1H	1.56	1.38		1557586_s_at
LOC285084	1.22	0.93		1557570_a_at
LOC148987	0.66	0.81	B2RDA6 /// Q0VDI3 /// Q6GMT5	1557567_a_at
SPOCD1	0.45	0.72		1562415_a_at
	1.23	1.42		1557527_at
	0.71	1		1557522_x_at
	0.69	1.01	Q8IZQ5	1557507_at
	0.95	1.01	A6NHK4 /// Q17RA5	1557487_at
SHB	1.04	1.18		1557458_s_at
MOSPD1	0.67	0.68		1557455_s_at
	0.61	0.87		1557433_at
LETM2	0.58	0.6	Q8N3D4 /// Q9NQ27	1557415_s_at
ZNF131	0.84	0.98		1557384_at
	0.44	1.28	P30414 /// Q16060	1557375_at
MYCBP2	1.01	1		1557370_s_at
LOC440944	1.04	1.41	B3KN75 /// B3KVC6 /// B4DG64 /// B7ZA36 /// Q5JTF2 /// Q9Y253	1557357_at
	0.83	1.16		1557353_at
SQLE	1.01	0.76		1557352_at
	1.06	1.33		1557348_at
ZNF230	1.32	0.73		1557322_at
C12orf61	1.34	1.32		1557312_at
LOC100131354	1.6	1.03		1557311_at
	0.97	0.84	B4DJF5 /// B4DZ35 /// Q14679	1557302_at
LOC440993	1.13	1.09	B3KWZ6 /// Q6Q759	1557293_at
	0.9	1.11	B3KMR0 /// B3KUZ7 /// B4E054 /// Q8TF11 /// Q9UI12	1557286_at
	0.93	1.15		1557275_a_at
	1.02	1.68	B3KMK8 /// B3KVZ9 /// B4DK68 /// O95210 /// Q6ZV65	1557270_at
ZNF382	0.49	0.37		1557260_a_at
BCL10	0.94	0.75	B2RB74 /// B3KQP1 /// B4DLH7 /// B4DT74 /// B4DTB4 /// O75352 /// Q1HDL3 /// Q8WY80 /// Q96K24 /// Q9H3L2	1557258_a_at
	1.53	1.6	B7ZMN6 /// O60237 /// Q2TAI8 /// Q6GQY8	1557242_at
	0.83	1.39	Q05C62 /// Q6ZMY3 /// Q96I05	1557238_s_at
TPR	1.51	1.5		1557227_s_at
RBPMS /// SDHALP2	1.75	1.21	B7ZKU4 /// B7ZKU8 /// Q3MJD5 /// Q9Y4D8	1557223_at
	0.81	1.01		1557192_at
DNASE1	0.94	0.82		1557189_at
C11orf87	0.6	1.04		1557181_s_at
C11orf87	0.57	1.14		1557180_at
C14orf37	0.53	0.89		1557176_a_at
	2.21	1.43	Q86WC6	1557174_a_at
NEK8	1.29	1.12		1557170_at
HCG11	0.95	0.66	B9EGM0 /// Q15464	1557169_x_at
HCG11	1.04	0.93	B2RE62 /// B4DR28 /// B4DRA6 /// Q2I381 /// Q9UJG1	1557167_at
	0.74	1		1557164_a_at
MLL3	1.04	1.23	A8K2P3 /// Q2TB22 /// Q59EM2 /// Q6P4F9 /// Q9UJF2	1557158_s_at
STK38	0.86	1.28	A8K1M9 /// B4DY93 /// B7Z7T4 /// Q2VYF4	1557145_at
CSMD2	1.05	0.82		1557143_at
TMEM17	1.1	1.09	B3KQ42 /// B4DRL3 /// P52739	1557137_at
	0.86	0.89		1557121_s_at
APOL6	1.39	1.31		1557116_at
LOC284385	1.02	1.66	O75592 /// Q9NWD4 /// Q9UG08	1557114_a_at
VPS53	0.87	0.99		1557112_a_at
HECTD1	0.96	0.8	B4DSR0 /// P42704	1557100_s_at
RBM25	0.95	1.24	Q6ZR93	1557081_at
ITGBL1	2.13	2.82		1557080_s_at
ITGBL1	1.86	2.15	B4DHX0 /// B4DX34 /// Q14534 /// Q5HYI4 /// Q9UNR6	1557079_at
SLFN5	0.84	1.01		1557078_at
	1.73	1.99		1557077_a_at
TTBK2	0.91	1.24		1557073_s_at
LUC7L	0.86	1.12	B7Z1W6 /// B7Z6Y7 /// B7Z823 /// Q2TAM4 /// Q4QRK8 /// Q6DKI9 /// Q9BSR4 /// Q9H6S8 /// Q9H9Y6 /// Q9NVC2	1557067_s_at
HGSNAT	0.99	1.21	A8MV38 /// O14853 /// Q9UIE0	1557064_s_at
LOC643837	0.6	1.09	B2RMN9 /// Q8N7H1	1557055_s_at
UBE2G2	0.69	0.85		1557053_s_at
	0.64	0.87	Q6P3S1 /// Q96AX6	1557051_s_at
	0.99	0.55	B2RBD9 /// B4DH49 /// B4DHF7 /// B4E0Z9 /// B4E302 /// B4E3H6 /// B4E3L7 /// B7Z3G3 /// O75410 /// Q5HYH0 /// Q8IUJ5	1557050_at
LOC149478	1	1.18		1557049_at
ZBTB1	1.04	1.49		1557036_at
CHD1L	0.8	0.79	A8K841 /// B1ANB7 /// Q6P9H1 /// Q8TDD5	1556988_s_at
	2.79	0.75		1556936_at
LAYN	1.33	1.18	A2TDT2 /// O95999 /// Q5VUF1	1556886_a_at
LAYN	0.88	1.51		1556885_at
ALDH1L2	0.86	0.63		1556841_a_at
LOC339929	0.91	1.37		1556827_at
DLEU2	1.32	1.2		1556821_x_at
DLEU2	1.08	0.64		1556820_a_at
	1.27	1.16	Q5JQF8	1556754_at
LOC153577	0.87	1.08	P17931 /// Q59FR8 /// Q6FGL0 /// Q6IBA7 /// Q6NVH9 /// Q86TY5	1556750_at
	1.02	1.37		1556744_a_at
LOC284805	0.95	1.62	A8K8Z8 /// A8K990 /// B2RUU6 /// B4DGH5 /// B4DMS4 /// Q86TY3	1556722_a_at
FLJ42709	0.92	1.29	B4DW95 /// Q86SG6	1556696_s_at
FLJ42709	0.83	0.62		1556695_a_at
	0.78	0.74		1556678_a_at
	0.87	1.19	B4DHW4 /// O94889 /// Q647K1 /// Q6PJF0 /// Q7Z3E8 /// Q96B51 /// Q9H8E7	1556646_at
C1orf204	1.27	1.28	A7MBM6 /// Q6N019 /// Q75MN6 /// Q8NEZ4	1556633_at
LOC203107	0.99	1.14	Q2L6J1 /// Q9BZY9	1556613_s_at
C15orf37	0.81	1.2	Q86X19	1556588_at
SLC8A1	0.45	0.35		1556583_a_at
LOC100129461	1.5	1.2		1556555_at
SLC39A6	0.88	0.94	B3KTP4 /// Q8NCM1 /// Q9BWW8	1556551_s_at
COL1A1	0.86	1		1556499_s_at
	1.15	1.13	P49756	1556442_x_at
	0.69	0.96	B3KTP1 /// B4DN32 /// B4DQ02 /// O14549 /// O95965	1556434_at
LRRN4CL	1.11	0.47	B3KTP1 /// B4DN32 /// B4DQ02 /// O14549 /// O95965	1556427_s_at
LOC284219	1.24	1.28	B4E0B1 /// B4E128 /// Q08AF3	1556425_a_at
	0.83	0.8	Q6IQ55 /// Q8IWY7	1556393_at
CNPY3	0.94	1.26		1556389_at
	1.63	1.69	B4E2V0 /// Q68CP4 /// Q6IA03 /// Q8IVU6 /// Q96ED6 /// Q96M97 /// Q9H6I6	1556385_at
ANKRD13C	1.24	0.7	Q6ZRY0	1556361_s_at
	0.46	0.9	A6NMQ7 /// A8K3L4 /// A8MW66 /// P60604 /// Q8NDD5	1556346_at
	1.02	0.79		1556338_at
	0.91	1.06		1556301_at
PPA2	0.76	0.8		1556285_s_at
PPA2	0.5	0.56	B2RBA8 /// P35237 /// Q59F97 /// Q7Z2Y7	1556284_at
PAPD4	1.59	1.41		1556277_a_at
LOC400831	0.77	0.46		1556265_at
	1.92	1.34		1556242_a_at
	0.91	0.73	A8K6Z7 /// Q9BSK1	1556239_a_at
	0.87	1.01	B4DDS5 /// B4DJU0 /// B4DP26 /// Q6UX15	1556235_at
VCPIP1	0.71	0.8	B4DDS5 /// B4DJU0 /// B4DP26 /// Q6UX15	1556228_a_at
VCPIP1	0.7	0.75	B4DTU7 /// Q3SY69	1556227_at
	0.65	0.49	B4DSR6 /// Q14204 /// Q6P2H7 /// Q92862 /// Q9NRC3	1556216_s_at
	0.87	0.59	Q9P0K6	1556194_a_at
PRNP	1.5	1.53	Q9P0K6	1556190_s_at
KIAA0090	0.77	1.08		1556186_s_at
LOC729678	1.21	1.29	Q15252	1556180_at
TAF8	1.44	1.45		1556178_x_at
TAF8	0.93	1.16		1556176_at
IGSF3	1.17	1.19		1556162_at
ITFG1	0.75	0.87	B9EJD4 /// Q00LT1	1556151_at
	0.93	0.89	Q8NBC4	1556138_a_at
GPATCH2	0.87	0.96	B4DJX8	1556126_s_at
	1.26	1.22		1556123_a_at
	1.77	2.41		1556122_at
NAP1L1	0.96	1.16		1556121_at
	0.28	0.84		1556097_at
KIAA1908	1.65	0.93		1561666_a_at
LOC284926	1.16	1.75	Q6XLA1 /// Q8IU53	1556064_at
RPP30	1.31	0.68		1556061_at
ZNF451	0.71	0.82		1556060_a_at
SPEN	1.15	1.22		1556059_s_at
DNAJC7	1.07	1.28		1556053_at
BICD1	0.85	1.35	A8K9B9 /// Q9H223	1556051_a_at
	0.99	1.05	A7E2D6 /// A8K343 /// B7Z526 /// Q8IVL1	1556048_at
MAGEE1	0.49	0.78		1556047_s_at
ZNF207	1.11	0.86		1556035_s_at
	0.8	1.29		1556021_at
MESP2	1.32	0.94	Q96JK4	1556015_a_at
PEX13	0.89	1.18		1556009_at
	0.89	0.98		1556007_s_at
CSNK1A1	1.11	1.33	B4DR49 /// B4DWH6 /// B4E224 /// Q13433	1556006_s_at
BTBD7	1.01	1.21		1556000_s_at
IGFBP5	1.36	0.81	P08582 /// Q53XS6	1555997_s_at
EIF4A2	0.92	0.79		1555996_s_at
	1.2	1.18		1555989_at
ZFYVE16	1.59	1.53		1555982_at
FLJ39609	0.73	1.02	B7Z4S2 /// P02452 /// Q6LAN8 /// Q9UMA6	1555980_a_at
	1.23	0.92		1555978_s_at
	1.16	1.25		1555977_at
	0.84	0.91		1555974_a_at
	1.41	0.85		1555973_at
FBXO28	0.73	0.74	Q8ND94	1555971_s_at
	0.91	0.87		1555970_at
	1.2	0.78		1555968_a_at
	1.3	1.15		1555967_at
ARL17P1	0.88	0.25		1555964_at
HINT1	0.84	0.98	Q9BT09	1555961_a_at
HINT1	0.91	0.96		1555960_at
CD55	1.55	1.22		1555950_a_at
FAM120A	0.77	0.8		1555948_s_at
FAM120A	0.87	0.87		1555947_at
FAM120A	0.8	0.89	B3KQ97 /// Q8N6S4	1555945_s_at
VIM	0.8	0.91	O60741 /// Q86WJ6	1555938_x_at
KIAA2013	0.66	0.8	A2VDI1 /// B2RWN5 /// B3KWS1 /// B4E263 /// B7ZAU8 /// Q5T3Q7 /// Q6P664 /// Q8N7L7 /// Q96ES5 /// Q9H583	1555933_at
CBX3	1.5	1.15		1555920_at
RPUSD3	0.86	0.92		1555916_at
ST7OT1	0.73	0.65		1555912_at
PTCD2	0.86	1.01	B2RA86 /// B4DDE7 /// B4DIB6 /// B4DM66 /// B4DMB0 /// B4DS31 /// B4DSZ2 /// B4DT00 /// B4DZ01 /// B7ZAN9 /// O95319	1555910_at
FAM120A	1.34	0.94		1555908_at
hCG_2014417	0.99	1.3	A6MUU8 /// B5MCZ7	1555907_at
C3orf23	0.93	0.96		1555905_a_at
	0.74	1.04	P81133	1555900_at
KDM1	0.78	1.15		1555897_at
MTSS1L	1.24	1.25	A6NKL9 /// A8K0P2 /// B4DFH3 /// B4DR66 /// B4DRZ4 /// Q4W5E9 /// Q9H2U2	1555894_s_at
LOC253039	1.08	0.82	A8K0P2 /// B4DFH3 /// B4DR66 /// B4DRZ4 /// Q9H2U2	1555892_s_at
CRTAP	1.01	0.94		1555889_a_at
UBR5	0.66	0.68		1555888_at
PDSS2	1.35	0.99	Q6PIY7	1555886_at
SPIN3	1.18	1.11	A1L168	1555883_s_at
SPIN3	1.09	0.81		1555882_at
LZTS2	0.93	1.08		1555881_s_at
RPS24	0.69	0.98		1555878_at
SRGAP1	0.86	0.91		1555875_at
PDHA1	0.87	0.99	B4DM84 /// Q96JH7	1555864_s_at
	1.2	1.1	B4DM84 /// Q96JH7	1555860_x_at
	1.29	1.13	Q6ZMS7	1555858_at
	3.45	1.1	Q5W161	1555854_at
	3.35	2.17		1555852_at
SEPW1	0.64	0.9		1555851_s_at
	0.95	0.88		1555848_at
LOC284454	0.87	0.98		1555847_a_at
	1.04	0.78	B2R9U1 /// Q92478	1555846_a_at
	1.31	1.31	A2RUF3 /// B3KM24 /// B4DDU0 /// B4DFE5 /// B7Z3G4 /// B7ZM87 /// O75044	1555845_at
HNRNPM	0.85	0.98	B4DMQ6 /// B9EIQ9 /// Q5T024 /// Q5T025 /// Q96M02	1555844_s_at
HNRNPM	0.76	0.98		1555843_at
C9orf30	0.78	0.82	B4DJ34	1555841_at
POLR2B	0.82	0.79	Q8N766	1555837_s_at
IRGQ	0.79	1.18		1555833_a_at
KLF6	0.65	0.88	B4DZU5 /// B5ME22 /// Q7Z7C8	1555832_s_at
LRRC41	0.6	0.89	B4DZU5 /// B5ME22 /// Q7Z7C8	1555831_s_at
FAM62B	0.97	0.61	Q765P7 /// Q8TB44	1555830_s_at
EPR1	1.07	0.56		1555826_at
PACS2	1.39	1.03		1555823_at
AKT1S1	1.21	1	O75054	1555821_a_at
MKS1	0.95	1.17		1555820_a_at
L3MBTL2	0.78	0.73		1555815_a_at
RHOA	0.81	0.92	B4DHQ9 /// B4DSA2 /// B4DXC2 /// Q8TB96	1555814_a_at
C11orf57	0.94	1.28		1555803_a_at
ARPC5	0.88	0.9		1555797_a_at
ZFP82	0.81	0.73	B9EG89 /// O14827 /// Q68DX5	1555793_a_at
TMEM192 /// ZNF320	0.61	0.66	A8K5C3 /// Q6PIX0 /// Q9NW75	1555790_a_at
PHF23	1.03	1.03	A8K5C3 /// Q6PIX0 /// Q9NW75	1555789_s_at
C14orf34	0.91	0.9		1555786_s_at
XRN1	0.78	0.78		1555785_a_at
PQLC2	1	0.99	B3KV44 /// B7Z2V4 /// B7Z4K9 /// B7Z5H0 /// B7Z9C2 /// P55209	1555783_x_at
PQLC2	0.87	0.94		1555781_at
RHEB	0.74	0.83		1555780_a_at
POSTN	2.56	1.92		1555778_a_at
TIMM10	1.34	1.27		1555764_s_at
RBM15	1.06	1.03		1555762_s_at
RBM15	0.79	0.79	B3KTT3 /// B4DI36 /// Q86UA6 /// Q8N1H0	1555760_a_at
CDKN3	1.03	0.86		1555758_a_at
GEMIN7	0.9	0.85		1555751_a_at
AGTRAP	0.92	0.93		1555736_a_at
BAP1	0.91	1.48		1555735_a_at
CFL1	0.69	1.02	B2R799 /// B4DJR3 /// P78346 /// Q5VU10 /// Q5VU11	1555730_a_at
TAGLN	0.5	0.9	B4DYS2 /// Q4KMR5 /// Q96JY2 /// Q9Y4E5	1555724_s_at
CMTM3	0.76	0.67	Q5VVE2 /// Q5VVE3 /// Q96T58	1555705_a_at
RTN4IP1	0.88	1.2	B2R9I8 /// Q13562	1555679_a_at
KRTAP2-4	0.25	0.51	A8K4T2 /// B4DKK3 /// B7Z9W6 /// Q59EH7 /// Q7Z784 /// Q99615	1555673_at
HNRNPA3	0.58	0.68	A8MVZ6 /// B9EGC4 /// Q96G01	1555653_at
RAB34	0.81	1.1	Q5JXC7 /// Q9HCI5	1555630_a_at
SAE1	1.01	0.95		1555618_s_at
ZMAT3	0.89	0.88	B1B0A5 /// Q9NS66	1555609_a_at
MBNL1	0.69	0.79	A8K6Y6 /// A8MTG3 /// B4DQT7 /// O43670 /// Q59G94 /// Q8N395	1555594_a_at
PTPRM	0.9	0.98	B3KS32 /// B3KTQ3 /// B3KTQ6 /// B3KUD6 /// B3KY41 /// B3KY54 /// B4DEL1 /// B4DI56 /// B4DT59 /// B4DUZ2 /// B4DVY5 /// B4E0L3 /// B4E229 /// P53814 /// Q59F18	1555579_s_at
PTPRM	0.89	0.67	A8K5S5 /// Q9BZQ4	1555578_at
KDELR1	0.89	1.02		1555575_a_at
ZCCHC7	0.97	0.82		1555562_a_at
UGCGL2	0.56	0.99	Q8WXF2	1555561_a_at
BBS9	1.22	1.28	P24593 /// Q8WV97 /// Q96HT5	1555555_at
CLCC1	0.78	0.6	B4DJX6 /// Q14240 /// Q53XJ6 /// Q59GT8 /// Q5JWW0 /// Q86WD0 /// Q96B07 /// Q9NZE6	1555543_a_at
RNH1	1.57	1.31	Q6IC83	1555529_at
2013-09-06	2.22	1.77		1555526_a_at
MEMO1	0.85	0.84	B3KXA7 /// Q5H9U2 /// Q7Z3T8	1555522_s_at
PIAS2	0.87	0.73	B3KP44 /// Q495Z4	1555514_a_at
RSRC1	0.96	0.93	Q8N8E4	1555501_s_at
SLC2A4RG	1.24	0.94		1555500_s_at
SDCCAG10	0.86	0.89		1555495_a_at
C19orf66	1.8	2.33		1555491_a_at
FLJ14213	0.71	0.64		1555486_a_at
FBLIM1	0.82	1.7		1555480_a_at
FMN2	0.76	0.84	B4E0H5 /// Q9NVF7	1555471_a_at
	1.22	1.15		1555461_at
SLC39A6	1.07	0.9		1555460_a_at
MUDENG	0.77	0.8		1555448_at
TRAPPC10	1.29	0.96	Q7KZJ4 /// Q8IVW1	1555446_s_at
AFF4	0.93	1.32	P49773	1555436_a_at
SYNCRIP	0.86	1.02	Q6STG1 /// Q9NZB2	1555427_s_at
KLF7	1.21	1.7	Q6STG1 /// Q9NZB2	1555420_a_at
ASAH1	0.68	0.63	Q6STG1 /// Q9NZB2	1555419_a_at
CCNL1	1.04	0.98	B3KRK8 /// P08670 /// Q53HU8	1555411_a_at
C14orf21	0.93	1.56	P57058	1555390_at
SNX25	1.2	1.26	A6NJM2 /// B2RXJ9 /// Q8IYS2	1555388_s_at
	0.82	1.63	A8K773 /// B4DS39 /// B7Z3P5 /// Q6P087	1555374_at
DNAJC11	0.84	0.95		1555360_a_at
ENTPD4	0.74	0.97	B3KPU6 /// B7Z5D0 /// B7Z8L7 /// B7Z8R2 /// Q8WV60	1555358_a_at
ETS1	0.9	1.34	Q6STG1 /// Q9NZB2	1555355_a_at
PPHLN1	0.91	0.86	B7Z718	1555351_s_at
SLC30A5	0.73	0.85	A8K9P1 /// Q0P5T9 /// Q4G0M4 /// Q8N3R3	1555334_s_at
ADAM9	1.09	0.75	A8K9P1 /// Q0P5T9 /// Q4G0M4 /// Q8N3R3	1555326_a_at
ZNF26	1.05	0.94	B3KU88 /// Q6P1M9	1555325_s_at
PTK7	1.61	1.54		1555324_at
	0.9	0.93		1555311_at
ECE2	1.13	0.87	B5MDG5 /// Q765P7 /// Q8TB44	1555306_a_at
DIP2A	0.83	0.71		1555301_a_at
FAM40B	0.68	0.95		1555292_at
FBF1	0.97	0.89	B3KME2 /// B3KQR7 /// B3KS71 /// B3KUP0 /// B3KX16 /// B4DPA3 /// O75718 /// Q8NB01	1555288_s_at
ARMC8	0.85	1.03	B3KML2 /// O95071 /// Q49A65	1555281_x_at
ARMC8	0.71	1.07	B2RE48 /// B4DKU5 /// B4DWD3 /// Q86YH6	1555279_at
CKAP5	0.93	1.03	B7Z8W2 /// Q5JUX0	1555278_a_at
SELI	0.63	0.88	B7Z8W2 /// Q5JUX0	1555274_a_at
RSPH10B2	0.77	1.02	B1AL11 /// B1AL12 /// B1AL13 /// B4DP66 /// Q9BRK4 /// Q9BRY6	1555272_at
WFS1	0.62	0.89	P62847 /// Q5T0P7 /// Q5T0P8 /// Q7Z3D1	1555270_a_at
RAPGEF6	1.4	1.1	Q6ZRF8	1555247_a_at
C8orf59	0.84	0.87		1555243_x_at
C8orf59	1.09	1.12		1555241_at
GNG12	0.98	0.83	A5YPB6 /// A5YVE9 /// B2R5P7 /// B7Z3T7 /// B7Z3X5 /// P08559 /// P78557 /// Q15994 /// Q53GE3 /// Q5JPT8 /// Q5JPT9 /// Q5JPU0 /// Q5JPU1 /// Q5JPU2 /// Q5JPU3 /// Q6LCA3 /// Q99724 /// Q99725 /// Q9UNV7	1555240_s_at
C21orf88	0.81	0.3	Q8NC24	1555231_a_at
C1S	2.55	1.49		1555229_a_at
C1orf43	1.01	1.02		1555226_s_at
C1orf43	0.79	0.91		1555225_at
RMND1	1.06	1.17	A8MZ64 /// P63302	1555201_a_at
ZNF277	1.74	1.42		1555193_a_at
PBLD	0.74	1		1555175_a_at
ST3GAL3	0.87	0.88		1555702_a_at
CALN1	2.32	0.7		1555168_a_at
QKI	0.96	0.76	B2RC35 /// Q8IYR6 /// Q96H12	1555154_a_at
FCHO2	1.14	1.31	A8K1A8 /// A8MW88 /// B2WTN6 /// B4DH29 /// B4DHJ3 /// B4DR40 /// P30876	1555153_s_at
C1orf96	1.68	1.75	A8K1A8 /// B4DH29 /// B4DHJ3 /// B4DR40 /// P30876	1555145_at
ZNF575	1.24	1.01	B2RNP3 /// B7ZMD6 /// Q6ZR23 /// Q6ZVB3 /// Q8WZA9	1557119_a_at
MIER1	0.75	0.8	A8K5G8 /// B4DK79 /// B5MD92 /// Q15345 /// Q53F69 /// Q562F1 /// Q9H822	1555105_a_at
PTGFR	0.68	0.75	A0FGR8 /// A6NFV7 /// A6NJB3	1555097_a_at
LPGAT1	0.69	0.76	A8MPP8 /// B4DVC5 /// B7WNX4 /// Q9NXB0	1555058_a_at
NAGA	1.33	0.87	A5D8V1 /// A8K617 /// B3KTM3 /// Q86VX6 /// Q8IZD0	1555041_a_at
IDH1	0.82	0.75	B4DKN9 /// P61586 /// Q53HM4 /// Q9BVT0	1555037_a_at
SCARF1	1.15	1.68	A8K948 /// B3KP95 /// B4DIH6 /// Q6AWB6 /// Q86TX3 /// Q9NVH0	1555021_a_at
ZNF398	1.05	0.96	Q6ZUT1 /// Q9NVH7	1555015_a_at
SYNJ2	1.22	1.37	B1ALC0 /// O15511	1555009_a_at
WDR66	0.45	0.46	Q8N141	1555007_s_at
PTGS2	0.45	0.2	A2RRD8 /// Q6ZP55 /// Q8IY95	1554997_a_at
GOLGA3	1	1.12	B3KVH8 /// B4DLK6 /// Q9BUL5	1554987_at
SNX19	1.46	1		1554986_a_at
FILIP1L	0.77	0.75	B3KW17 /// B4E2K3 /// Q8IZH2	1554966_a_at
FUT8	1.34	1.23	B3KWQ5 /// Q6ZP29	1554930_a_at
ABCC4	0.92	0.99	A8K005 /// B4DFJ2 /// Q15382 /// Q6NZ61	1554918_a_at
PDE12	0.83	0.76	B1ALD8 /// B1ALD9 /// B4E3A7 /// B7Z4V4 /// B7Z6G1 /// C0IMJ1 /// C0IMJ2 /// C0IMJ3 /// C0IMJ4 /// Q15063	1554915_a_at
MPHOSPH6	0.26	0.54	B9EG67 /// Q86SH2	1554906_a_at
PCBD2	1.28	1.35	B9EG67 /// Q86SH2	1554894_a_at
TIA1	0.76	0.88	A8K3D9 /// P30304	1554890_a_at
PRIM2	1.2	0.95	A8K136 /// P62072	1554885_a_at
ERCC8	0.5	0.53	A1A693 /// A8MX79 /// Q3ZB86 /// Q4V760 /// Q59EY1 /// Q86VW9 /// Q96T37	1554883_a_at
ABCD3	0.85	0.85	A8MT50 /// B7Z1E2 /// Q16667 /// Q3SYQ4 /// Q86SK4 /// Q86SK7 /// Q86SK8 /// Q9BPV5 /// Q9BY34 /// Q9C043 /// Q9C044 /// Q9C045 /// Q9C048 /// Q9C050	1554878_a_at
CSPP1	0.93	0.72	Q6IA34 /// Q9H840	1554873_at
WDR37	1.02	1.02	A8K1X7 /// A8MVQ5 /// Q6RW13	1554869_at
PCNP	0.84	0.73	A8K993 /// B3KS40 /// B4DI37 /// Q92560 /// Q96TC6	1554868_s_at
PRR16	0.79	1.16	B4DQZ1 /// B8ZZZ1 /// Q53R44 /// Q53T10 /// Q96PC3	1554867_a_at
BLZF1	1.17	0.85	B0YJ58 /// Q01995 /// Q53GC9 /// Q59FA5 /// Q5U0D2 /// Q6FI52 /// Q96FG7	1558560_s_at
STEAP3	0.46	0.79	B3KQJ8 /// Q96MX0	1554830_a_at
ZBED1	0.96	1.05	B2R9Y1 /// Q8WWV3 /// Q96RL8	1554821_a_at
SPIRE1	1.17	0.72	P0C7H8 /// Q9BYR9 /// Q9BYS0	1554807_a_at
FBXO8	0.97	0.96	B4DDB6 /// B4E036 /// B4E3E6 /// P51991 /// Q66K53 /// Q7GXZ2 /// Q8NFG3	1554806_a_at
FBLIM1	0.43	1.28	A8K9U0 /// B3KMN4 /// B8ZZ74 /// Q96PK6 /// Q9BWF3	1554795_a_at
UBE3C	0.87	0.75	B4DRR9 /// B4DV97 /// Q96FE7	1554794_a_at
UBE3C	1.15	1.43	A8MYQ9 /// B4DNC0 /// B4E3A0 /// Q6NXT3 /// Q96PJ7 /// Q9BZG1	1554793_at
PHTF2	0.86	1.11	B3KVA6 /// Q9HA38	1554780_a_at
ZNF785	1.35	1.24	B4DLS5 /// B4E233 /// Q68DD0 /// Q86UV8 /// Q86UV9 /// Q86VM6 /// Q96P92 /// Q96RE3 /// Q9NR56	1554770_x_at
ZNF785	0.91	0.91	A7MBN1 /// B4DGA3 /// B4E143 /// P28827 /// Q49AC9 /// Q86V60	1554769_at
MAD2L1	1.14	0.86	A7MBN1 /// B4DGA3 /// B4E143 /// P28827 /// Q49AC9 /// Q86V60	1554768_a_at
CRYZL1	0.66	0.89	B2R6N4 /// P24390 /// Q8NBW7 /// Q96H29	1554767_s_at
WWC2	1.78	1.74	B7ZVW5 /// Q9NQQ0	1554762_a_at
HEATR2	1.08	1.14	B4E024 /// Q05DN1 /// Q8N3Z6	1554761_a_at
INPP5A	0.42	0.42	A6NKL4 /// A6NP03 /// Q05D90 /// Q08AC9 /// Q2TAA6 /// Q6NVZ4 /// Q8N5K0 /// Q9NV86 /// Q9NYU1	1554757_a_at
2013-09-02	1.02	0.92	Q05D90 /// Q08AC9 /// Q2TAA6 /// Q6NVZ4 /// Q8N5K0 /// Q9NV86 /// Q9NYU1	1554747_a_at
PMS1	0.82	0.92	B3KQ86 /// B3KRC8 /// B4DMF1 /// Q3SYG4	1554742_at
FGF7 /// KGFLP1 /// KGFLP2	1.78	1.91	B3KQX4 /// Q5T1P5 /// Q96S66	1554741_s_at
IPP	0.95	0.79	P13489 /// Q59GB3 /// Q8IZK8 /// Q96FD7 /// Q9BQ80	1554740_a_at
ZNF655	1.3	1.22	B1AMS2 /// B4DPT4 /// B4DZW0 /// B4E049 /// Q14141 /// Q541S4 /// Q548C9 /// Q6B514 /// Q6NT82 /// Q8NFH9	1554726_at
TAF2	1.01	1.36	A8K3Y8 /// B4DIS3 /// B4DLS0 /// B5MCI6 /// Q2VIM3 /// Q5R2V8 /// Q9Y316	1554721_a_at
ATP8B3	0.69	0.94	A0AUV6 /// A4D0T4 /// A4D0U8 /// A8MTU2 /// A8MUV4 /// B4DLD9 /// B7ZLK5 /// O15409 /// Q0PRL4 /// Q68DX8 /// Q8N6B5 /// Q8N6B6 /// Q8NFT3	1554704_at
ARHGEF10	0.84	0.97	A8MSS2 /// A8MV90 /// B4DGW0 /// O75928 /// Q2TA77	1554703_at
TBC1D16	0.97	0.97	B4DTW0 /// Q96IZ7	1554701_a_at
TYMS	1.22	1.18	B4DPE6 /// Q2PHL5 /// Q9NR83	1554696_s_at
PACSIN2	1.29	1.36	Q9NUL5	1554691_a_at
TACC1	1.28	1.36	B3KNU3 /// Q6MZQ0	1554690_a_at
LAPTM4B	0.71	0.5	Q5VVD6 /// Q8WUP2	1554679_a_at
HNRPDL	0.72	0.82	A8KAC7 /// P48200 /// Q1HE21 /// Q59FQ7 /// Q8WVK6 /// Q9UF17	1554678_s_at
GGA1	0.79	1.02	A8KA76 /// Q9BYX4	1554670_at
METTL8	0.83	0.85		1554667_s_at
ZNF586	0.76	1.45	B4DR49 /// B4DWH6 /// B4E224 /// Q13433	1554665_at
C1orf71	0.92	0.94	B4DR86 /// Q5JS12 /// Q5JS13 /// Q5JT61	1554661_s_at
C1orf71	0.39	0.86	B4E1V4 /// Q9H0R1	1554660_a_at
PALM2	0.91	0.93	Q5JPH6 /// Q86YH3	1554640_at
	0.8	0.77	B4DIW3 /// Q15043	1554636_at
ATM	1.86	1.49	B2R8Z8 /// B7Z213 /// B7Z645 /// O60506 /// Q05CK9 /// Q59GL1 /// Q5TCG1 /// Q5TCG3	1554631_at
ZNF57	0.76	0.72	B2RB03 /// B3KNE6 /// B7Z4F7 /// O75840 /// Q7Z3H8 /// Q96E51	1554628_at
ASCC1	1.19	1.07	A8K0B6 /// B1B5P6 /// B1B5P7 /// B1B5Q0 /// B1B5Q2 /// B1B5Q3 /// B1B5Q8 /// B1B5Q9 /// B1B5R8 /// B1B5R9 /// B1B5S5 /// B1B5S6 /// B1B5S7 /// B1B5S8 /// B1B5T0 /// B1B5T7 /// B3KUZ6 /// Q13510 /// Q53H01 /// Q6W898 /// Q96AS2	1554627_a_at
	0.74	0.79	Q6P4E2 /// Q71RC2 /// Q8TBL5 /// Q8WVX5 /// Q96J85	1554609_at
CEP120	0.81	0.71		1554606_at
ERC1	0.53	0.66	Q96JC4	1555294_a_at
LMNA	0.9	0.94	B1AK20 /// B3KTC6 /// B4DGD5 /// B4DPK2 /// Q5TH61 /// Q9NVH1 /// Q9UMU8	1554600_s_at
	0.83	1.03	B4DU21 /// Q8NE73 /// Q9Y227	1554599_x_at
	1.13	1.18	A8K725 /// B4DW78 /// P14921 /// Q5U0M2 /// Q6FG54 /// Q6N087 /// Q96AC5	1554597_at
SYMPK	0.95	1.18	Q07954 /// Q59FG2 /// Q6LBN5 /// Q6PJ72 /// Q7Z7K9 /// Q86SW0	1554595_at
TTC30B	0.98	0.98	B5MDD4 /// B7Z695 /// B7Z8L1 /// B7Z8M9 /// Q8NEY8	1554588_a_at
C12orf72	2.33	0.92	B5MDD4 /// B7Z695 /// B7Z8L1 /// B7Z8M9 /// Q8NEY8	1554582_a_at
PSMD10	0.78	0.9	A8K553 /// Q969I6 /// Q9NWA2	1554577_a_at
CYB5R3	0.92	0.96	B7ZM89 /// Q8TAD4 /// Q9BTR6 /// Q9BVY8 /// Q9BY48 /// Q9H9X0	1554574_a_at
SUV39H2	0.66	0.73	A0AVL1 /// B4DDM8 /// B7ZLN7 /// Q13443	1554572_a_at
ATP11B	0.73	0.64	A8K5C8 /// P17031 /// Q658Q3 /// Q86X57	1554557_at
ATP11B	1.13	0.64	B3KP36 /// B7Z471 /// B7Z477 /// Q13308 /// Q59FV9 /// Q86X91 /// Q9NSQ6	1554556_a_at
SETD6	0.97	0.81	Q9UL26	1554555_a_at
YIF1B	0.63	0.8	A5PLK8 /// B4DF19 /// B4DHU4 /// B4DKF3 /// B7Z1P1 /// O60344 /// Q6UW36 /// Q8NFD7	1554553_s_at
WDR20	0.52	0.62	B4E0F0 /// Q14689 /// Q8N7L2 /// Q96NX2	1554549_a_at
FAM13C	0.56	1.63	B7Z3D8 /// B7Z7Q7 /// B8ZZX3 /// B9EK71 /// Q502W6 /// Q53QF1 /// Q53RD3	1554547_at
RHOF	0.6	0.7	B2KYM6 /// B3KXH2 /// B3KXP7 /// B4E3L1 /// B7ZKP6 /// B7ZKP9 /// Q2M3L1 /// Q8NET8 /// Q8TET8	1554538_at
CNNM2	0.84	0.75	B2R894 /// B5MEM5 /// Q8IZ48 /// Q8TES7 /// Q96DV4	1554522_at
CCDC123	0.97	0.73	Q8WU57 /// Q9C0D9	1554513_s_at
CCDC123	0.61	0.77	B2RC85 /// B3KSE9 /// B7Z298	1554512_a_at
GHITM	0.81	0.84	O14746 /// Q8NG38 /// Q9UBR6 /// Q9UNR4 /// Q9UNS6	1554510_s_at
C10orf97	1.47	1.35	B4DJ99 /// O76024	1554509_a_at
RGS7	0.71	0.49	A8K710 /// B3KPG2 /// B4DQ47 /// Q9NYL2	1554500_a_at
THADA	0.84	0.58	A8MYH2 /// B7WPL9 /// Q6PFW1	1554493_s_at
CEP70	0.65	0.66	B3KXC1 /// Q5QP71 /// Q8NE35	1554489_a_at
SAR1B	0.77	0.83	A3KN82 /// A5PLL6 /// B2RTU6 /// B7Z7Y1 /// B7ZML2 /// O43386 /// Q8TEA3 /// Q8TEU7 /// Q9UHV4	1554482_a_at
ARMC10	0.93	0.8	B2RXE7 /// Q8N0T1	1554480_a_at
CARD8	1.12	0.96	B2RXE7 /// Q8N0T1	1554479_a_at
HEATR3	0.75	0.36	Q53GD1 /// Q69YP5 /// Q9UBI6	1554478_a_at
MOXD1	1.46	0.72	Q59G91 /// Q7Z513 /// Q9H4E5	1554474_a_at
PHF20L1	1.11	1.32	P59052 /// Q6ZPC3	1554472_a_at
ANKRD13C	1.01	1.06	A6NG18 /// A8K2N0 /// B3KNX0 /// B5MCV4 /// B7WPP9 /// P09871	1554471_a_at
ZBTB44	1.37	1.47	Q09GN0 /// Q9BWL3	1554470_s_at
ZBTB44	0.89	0.93	Q09GN0 /// Q9BWL3	1554469_at
ZNF673 /// ZNF674	0.95	0.86	B7Z7K2 /// Q96JD6	1554465_s_at
CRTAP	0.86	0.83		1554464_a_at
DNAJB9	0.8	0.93		1554462_a_at
LINS1	0.97	0.81	Q5SZ82 /// Q9H5X7 /// Q9NWS8	1554455_at
C7orf68	1.12	1.26	A4D0S7 /// Q75MZ1 /// Q75MZ2 /// Q8TCK8 /// Q8WWA6 /// Q8WY14 /// Q9NRM2	1554452_a_at
DNAJC14	1.18	1.14		1554451_s_at
MIER3	0.92	1.05	B2R5Q8 /// P30039 /// Q8NAD7	1554450_s_at
MIER3	0.7	1.33	A9Z1W2 /// B4DX62 /// Q11203 /// Q5T4W8 /// Q5T4W9 /// Q5T4X0 /// Q5T4X7 /// Q5T4X8 /// Q5T4X9 /// Q5T4Y0 /// Q5T4Y1 /// Q5T4Y2 /// Q5T4Y3 /// Q5T4Y4 /// Q96L53	1554449_at
LOC554203	0.77	0.91	A4D0Q9 /// A8MU66 /// A8MZ33 /// B7Z8W6 /// P43490 /// Q5SYT8 /// Q658Z1	1554447_at
C2orf18	1.64	1.02		1554444_s_at
WAPAL	0.82	0.87	P55198 /// Q6P2C6 /// Q96I32 /// Q99882	1554441_a_at
KIAA1217	0.51	0.28	B4DHR6 /// Q8WY44 /// Q96PU8	1554438_at
ZNF146	0.94	1.06	A0JLQ4 /// B4DEU7 /// B4DHK0 /// Q0JRZ9	1554433_a_at
FAM165B	1.09	1.19	A8K5X2 /// Q6IQ19	1554432_x_at
DMWD	0.84	1.12	A8K0F4 /// Q92843	1554429_a_at
FIP1L1	0.73	0.54	Q9NP26 /// Q9NP27 /// Q9NZB8	1554424_at
FBXO7	0.92	0.96	B3KQ07 /// B4DX54 /// Q86XF7	1554423_a_at
APH1A	0.85	1.16	B3KTN7 /// B4DRA3 /// Q6JN45 /// Q8IWK6	1554417_s_at
TAF5L	0.65	0.97	Q587I5 /// Q8TEW8	1554415_at
OSGIN2	1	0.97	Q08AE0 /// Q32NC4 /// Q5TAD1 /// Q5TAD2 /// Q5TAD4 /// Q5TAD5 /// Q6NXT7 /// Q8N108	1554414_a_at
CTNNB1	0.61	0.78	P21781 /// Q6FGV5 /// Q96FG5	1554411_at
WBSCR16	1.38	1.45	A8K476 /// Q8IW19 /// Q8TCW9	1554410_a_at
TK1	0.85	0.99	P43088 /// Q4LEK1 /// Q6RYQ6	1554408_a_at
UEVLD	0.79	0.54	A0M8Q2 /// A8MX49 /// B3KX06 /// B5MCT7 /// B7Z2C3 /// P49593 /// Q0VGL7 /// Q6IPC0	1554397_s_at
ACTR2	0.99	0.94	A5D8Z4 /// A5XEH6 /// A5XEH7 /// A5XEH8 /// A5XEH9 /// Q96CZ6 /// Q9H4A3	1554390_s_at
TRAM2	0.9	1.2	B9A6N0 /// P35125 /// Q15635 /// Q1K9C9 /// Q6U210	1554383_a_at
PTPLA	0.66	1.11	Q53YL2 /// Q92604	1554376_s_at
PPP2R5C	0.79	0.85	B4DZL4 /// Q5JX01 /// Q5JX02 /// Q92674	1554365_a_at
DENND4A	0.92	1.13	A8K2Q2 /// B7Z3Q7 /// B7Z5H4 /// O15439 /// O75555 /// Q59GY6 /// Q8IUA3 /// Q8IVZ4 /// Q8IWU1	1554352_s_at
TIPRL	1.06	0.92	B2R5M8 /// B4DXS4 /// O75874 /// Q0QER2 /// Q567U4 /// Q6FHQ6 /// Q6FI37 /// Q6FIA4 /// Q7Z3V0	1554351_a_at
GIN1	1.18	1.11	B3KWN4 /// Q08AL8 /// Q6P667 /// Q8IYE7 /// Q9P0K1	1554345_a_at
AQP12A /// AQP12B	1.27	1.53	A8K6Z5 /// A8MQ05 /// B4DQC2 /// Q14162 /// Q8NHD2 /// Q8NHD3 /// Q8NHD4 /// Q8NHD5	1554344_s_at
HELQ	0.95	1.12	B4DXA9 /// B4E2P6 /// B4E377 /// Q8TD17	1554342_s_at
HELQ	0.88	1.09	B4DG94 /// B4DJU8 /// B4DLC4 /// O15056 /// Q5TA15	1554341_a_at
DYNC2LI1	1.72	1.15	Q8IY72	1554324_s_at
NFS1	1.42	1.19	A5PKX6 /// Q08378	1554321_a_at
UHRF1BP1L	1.64	1.38		1554292_a_at
UHRF1BP1L	0.74	1.06	A1A4Z1 /// Q8NA54	1554291_at
HERC3	2.09	2.42		1554290_at
TRIM4	1.23	1.21	A5PLL2 /// A8K8P8 /// B4DFS7 /// Q546E0 /// Q8IUA5 /// Q9BYC5	1554287_at
CCRN4L	0.7	0.98	A5D8W1 /// B9EIM7	1554283_at
CENPL	1.06	1.01	Q53HB4 /// Q8NHT4 /// Q99547	1554271_a_at
	0.86	0.65	Q9H0N5	1554266_at
FRYL	0.94	1.59	B4E0E5 /// P31483 /// Q59G98 /// Q96B58 /// Q9NWW7	1554260_a_at
PCNXL2	1.19	0.99	B4E0E5 /// P31483 /// Q59G98 /// Q96B58 /// Q9NWW7	1554256_a_at
HP1BP3	0.68	0.87	A8K7A0 /// P49643 /// Q5JU42	1554251_at
TRIM73	0.92	0.84	A8K3W1 /// B2RB64 /// B3KPW7 /// B4DGZ9 /// B4E383 /// Q13216 /// Q52LT0	1554250_s_at
ZNF638	0.76	0.66	A8K3W1 /// B2RB64 /// B3KPW7 /// B4DGZ9 /// B4E383 /// Q13216 /// Q52LT0	1554249_a_at
COCH	0.83	0.71	Q1MSJ5 /// Q9H688	1554241_at
ZADH2	0.86	1	A8K976 /// Q8WVG2 /// Q9Y2I8	1554239_s_at
C5orf41	1.38	1.3	Q53GF3 /// Q8WW12	1554229_at
CCDC132	0.44	0.73	Q569H4	1554217_a_at
FAM126B	0.91	0.96	Q8IZM0	1554178_a_at
ATP5S	0.4	0.97	Q7Z6N6 /// Q86XG0	1554177_a_at
ZMYM3	1.51	1.25	A5PKT5 /// A5PL05 /// B4DPB8 /// B4DPM8 /// Q02928 /// Q16802 /// Q5TCH4 /// Q5TCH5	1554172_a_at
ZMYM3	0.77	0.76	A8K6R0 /// Q53EV6 /// Q5T532 /// Q5T533 /// Q5T534 /// Q9H2G9	1554171_at
SH3KBP1	0.77	0.88	Q53TS8 /// Q8N7U5 /// Q96Q36	1554168_a_at
GOLGA7	0.88	1	A8K6E3 /// B8ZZX6 /// Q658P3 /// Q9H7Y1	1554167_a_at
TWIST2	1.92	1.06	B3KQZ2 /// Q6NW35 /// Q8N3S3 /// Q8N5I6 /// Q8TBW4 /// Q8WVD6 /// Q9Y3T4	1554163_at
ZMYND11	0.77	0.52	A8K2B5 /// B4DWX0 /// Q08AE8 /// Q8NDP1 /// Q96AS4	1554158_at
MCPH1	0.99	1.13	B2RB40 /// B3KVY7 /// Q8IWE1 /// Q8IXA8 /// Q9NRD0	1554155_at
OGDH	1.04	1.06	Q5VVD6 /// Q8WUP2	1554152_a_at
CLDND1	0.79	0.83	B4DHJ9 /// Q15386	1554149_at
SLC33A1	0.83	0.94	B4DHJ9 /// Q15386	1554148_a_at
KLRAQ1	0.78	1.02	A0AUZ9 /// B7ZLN1	1554145_a_at
WDR78	1.8	0.8	B2RBH9 /// Q8N4S0 /// Q9NZY7	1554140_at
KIAA1128	0.86	0.77	B3KQZ2 /// Q6NW35 /// Q8N3S3 /// Q8N5I6 /// Q8TBW4 /// Q8WVD6 /// Q9Y3T4	1554132_a_at
MSRB3	0.77	0.82	A8K8V0 /// B4DQL1	1554127_s_at
MSRB3	0.88	1.1	A8K8V0 /// A8MV39 /// B4DQL1 /// P0C7X2	1554126_at
NLGN4Y	1.51	2.18	Q13257 /// Q53F56 /// Q548X9 /// Q6IRW7 /// Q8IZX3	1554125_a_at
ULK2	0.91	0.7		1554112_a_at
NBEAL1	0.95	1.04	B3KNN3 /// B3KPE2 /// B3KU91 /// Q86Y56	1554106_at
TMEM185A	0.74	0.52	Q14642 /// Q149S6 /// Q4VAR4 /// Q5JT87 /// Q5T1B4 /// Q5T1B5 /// Q86V83 /// Q8N6C1	1554105_at
SPIN3	1.24	1.03	B4DIH7 /// B4DMF4 /// B4E3A1 /// B7ZAA0 /// P54277 /// Q3BDU4 /// Q4VAL4 /// Q5FBZ1 /// Q5FBZ2 /// Q5FBZ3 /// Q5FBZ4 /// Q5FBZ5 /// Q5FBZ6 /// Q5FBZ7 /// Q5FBZ8 /// Q5FBZ9 /// Q5XG96 /// Q68DF0 /// Q7KZT4	1554099_a_at
LOC554202	0.96	1.39	A2A6V3 /// A2A6V4 /// Q8N5C3 /// Q9Y573	1554097_a_at
RBM33	0.68	0.49	B4DU01 /// P35556 /// Q59ES6 /// Q8WYH1	1554096_a_at
RBM33	0.99	0.92	A4D291 /// A6NGD3 /// B3KVJ1 /// B4E3M4 /// B7Z9Q9 /// Q68DU4 /// Q8N720 /// Q96MB4	1554095_at
SBDS /// SBDSP	0.78	0.87	O60423 /// Q6ZUX8 /// Q7Z485 /// Q96LI4	1554089_s_at
TUBGCP3	1.01	0.46	O15013 /// Q2KHR8 /// Q69YW1	1554086_at
DDX51	0.99	0.81	B9A6L7 /// Q8N3Z4 /// Q8TBP0 /// Q96DH7 /// Q9NWL9	1554085_at
NOL9	0.76	1.03	A8K9A5 /// P04818 /// Q53FB7 /// Q53Y97 /// Q8WYK3 /// Q8WYK4	1554082_a_at
RQCD1	0.8	0.97	A0MSJ5 /// B4DJZ1 /// B4DM20 /// Q4ZGM1 /// Q9UGH3	1554080_at
DNAJA3	0.99	1	B2RBD9 /// B4DH49 /// B4DHF7 /// B4E0Z9 /// B4E302 /// B4E3H6 /// B4E3L7 /// B7Z3G3 /// O75410 /// Q5HYH0 /// Q8IUJ5	1554078_s_at
TMEM53	0.81	0.89	Q8WUJ3	1554077_a_at
TMEM136	1.44	1.48	Q86SJ0 /// Q86VI4 /// Q9NY06	1554076_s_at
C12orf66	0.56	0.86	B2RC80 /// Q8N0S2	1554067_at
C8orf76	1.26	1.28	A0AVF1 /// B7Z1H0 /// B7Z2T3 /// B7Z5M0 /// B7Z6R6 /// Q96CU4	1554063_at
XG	0.51	0.6	A8K3D3 /// B0QYR7 /// B3KTE2 /// Q6IC75 /// Q86YA9 /// Q8NCS6 /// Q9UJY5	1554062_at
LOC645676	0.89	0.96	A8K7U3 /// B3KW44 /// B4DLT0 /// B5ME25 /// Q9H825	1554057_at
FGFR1OP2	1	0.98	A0JLV8 /// B3KTS9 /// B4DTY6 /// Q8N6X9 /// Q9NXT0	1556283_s_at
SPTLC1	1.42	1.68	A8K394 /// Q14980 /// Q3SYK8 /// Q4LE64 /// Q59HB8 /// Q7Z757 /// Q86XH4 /// Q96HN5 /// Q9BTE9	1554053_at
TXNDC9	0.45	0.81	B1AQM9 /// Q6PJW8	1554047_at
C14orf159	0.96	1.12	B1AQM9 /// Q6PJW8	1554039_at
ZBTB24	1.05	1.39	A8MSU1 /// B1ALX9 /// B1ALY0 /// B1ALY1 /// B2RTU4 /// Q8IXS6 /// Q9Y2D5	1554036_at
ARSB	2.25	1.72	B3KXA7 /// Q5H9U2 /// Q7Z3T8	1554030_at
TTC37	1.2	0.93		1554029_a_at
SLC4A4	0.91	0.8	A8WFP7 /// B2RNX5 /// B4DSP3 /// Q13315 /// Q59GH6 /// Q68DE6 /// Q6P7P1 /// Q7KYL7 /// Q8TDS0 /// Q8TDS1 /// Q8TDS2 /// Q96QM9	1554027_a_at
MYO10	0.57	0.65	A5HJR3 /// A8MY82 /// B4DXX0 /// Q68EA5	1554026_a_at
ZNF12	0.99	1.12	B3KU20 /// B7Z518 /// Q8N9N2	1554021_a_at
BICD1	0.5	1.21	A1L4Q0 /// P52429 /// Q59FU4 /// Q8TBM4	1554020_at
C6orf182	1.06	1.15	A1L4Q0 /// P52429 /// Q59FU4 /// Q8TBM4	1554019_s_at
GPNMB	0.68	0.62	B3KY36 /// Q68D91	1554018_at
C16orf57	0.7	1.1	A8MTL9 /// B2R9H3 /// B4DTW2 /// P50452 /// Q8N178	1554016_a_at
CHD2	1.34	1.1	B4DMA6 /// B4DYZ7 /// B7ZAI6 /// B7ZAQ5 /// Q05BV7 /// Q15054 /// Q32MZ9 /// Q32N00 /// Q569I8 /// Q8TB74 /// Q8WUF6	1554015_a_at
CHD2	1.07	0.91	B2R686 /// O43493	1554014_at
NDST1	0.88	0.91	B3KPN2 /// B4DGR4 /// B7ZLJ1 /// B9EG83 /// Q5JPN0 /// Q8WXI2	1554010_at
OSMR	1.15	1.08	B4DLH5 /// Q8N960	1554008_at
RGNEF	0.44	0.68	A2RU77 /// B4DG07 /// Q8IUD2	1554004_a_at
TRIM37	0.92	1.13	B4DFR3 /// B4DI32 /// P02545 /// Q3BDU5 /// Q5I6Y4 /// Q5I6Y5 /// Q5I6Y6 /// Q5TCI8 /// Q5TCI9 /// Q5TCJ3 /// Q5TCJ4 /// Q6UYC3 /// Q8N519	1554001_at
ASPHD1	0.56	0.95		1553997_a_at
NT5E	0.76	0.85		1553995_a_at
NT5E	0.61	0.66	B7Z6F7 /// O75402 /// Q4LE61 /// Q92797	1553994_at
MED25	0.83	1	B0VJZ1 /// B2VAM3 /// Q96B70	1553993_s_at
NBR2	1.32	1.13	B4DL36 /// B6ZDP3 /// Q8N4P2	1553992_s_at
FLJ20674	0.83	0.89	Q8IXQ9	1553991_s_at
C12orf47	1.02	1.14	B4DHF6 /// B4DIN7 /// B4DTL5 /// O00308 /// Q6ZTQ5	1553987_at
DTYMK	0.87	1.01	B3KV76 /// Q9UC06	1553984_s_at
	1.14	0.94	Q5JSS2 /// Q5JSS3 /// Q5JSS4 /// Q9H5I1	1553979_at
LOC100133072 /// LOC729991	0.98	1.11	A8MQ42 /// B2RA86 /// B4DDE7 /// B4DIB6 /// B4DM66 /// B4DMB0 /// B4DS31 /// B4DSZ2 /// B4DT00 /// B4DZ01 /// B7ZAN9 /// O95319 /// Q5VZZ6	1553978_at
RP11-529I10.4	1	1.03	A5XEH5 /// B3KSJ2 /// B4DKX1 /// B4E3T1 /// Q7Z678 /// Q8N4L6 /// Q9Y2G3	1553976_a_at
C22orf39	1.51	1.34	A5XEH5 /// B3KSJ2 /// B4DKX1 /// B4E3T1 /// Q7Z678 /// Q8N4L6 /// Q9Y2G3	1553974_at
CBS	1.59	2.5	A8K380 /// B4DM46 /// B4E3Q8 /// B5ME38 /// Q6ZSV1 /// Q8TBK2	1553972_a_at
ADAT3	1.11	1.24	B7Z961 /// Q5BJH7 /// Q9H5F7	1553968_a_at
SNX21	1.52	1.07	B3KPG5 /// B3KR43 /// B4DN18 /// Q59GG1 /// Q86TU2 /// Q8NCN7 /// Q8TBZ3	1553961_s_at
SNX21	1.53	0.98	A8K181 /// B4DSU7 /// B7Z2K3 /// B7ZB77 /// Q5T630 /// Q5T632 /// Q8NE31	1553960_at
B3GALT6	0.65	0.94	Q8WW27	1553959_a_at
ZNF564	1.34	1.02	A6NP45 /// A8K1H8 /// A8MUU4 /// A8MWV2 /// A8MY86 /// A8MYL4 /// A8MZH3 /// B4DF42 /// B7Z3Y6 /// B7ZKS2 /// B7ZKS4 /// P02686 /// Q6ZVA1	1553957_at
ALS2CR4	0.67	0.88	A6H8U5 /// B4DHH2 /// B4DS36 /// O60271 /// Q5JB53 /// Q719J0 /// Q7Z5Q8	1553956_at
KLRAQ1	0.77	0.79	A8K0B7 /// Q8N9G7 /// Q9HBH0	1553955_at
ALG14	0.78	0.92	A8K535 /// B4DP48 /// Q8IUX1 /// Q9H2Q3	1553954_at
EXOSC6	0.74	1.01	Q9H8M5	1553947_at
LRRC28	0.89	0.92	A0N0P2 /// P33681 /// Q5DTA9 /// Q5DTB0 /// Q6LCB7	1553940_a_at
ELMOD2	0.8	0.99	B7Z8J7 /// Q8NEC7	1553928_at
ZNF486	1.07	0.46		1553901_x_at
TCEANC	1.64	2.26	B9EGA6 /// Q8WUL5 /// Q96ST8	1553815_a_at
KIAA1524	0.73	1	A8K9Z9 /// B4DNL0 /// B4DPG9 /// B4DSV8 /// Q5VT94 /// Q658I8 /// Q6FIA7 /// Q9H3K2 /// Q9P099 /// Q9Y6G2	1553810_a_at
C14orf126	0.97	0.51	A8MW85 /// Q9H8M7	1553801_a_at
C11orf45	0.41	0.86	B3KQR4 /// Q4G181 /// Q4KKV4 /// Q8IUX3 /// Q9Y3Q0	1553787_at
ZNF501	0.53	0.74	A8MWR6 /// B4DKI8 /// Q8IV54 /// Q9Y3Q8	1562386_s_at
MGC23270	1.21	0.79	B5MCZ2 /// B7Z223 /// B7Z257 /// P49802 /// Q45FD9 /// Q45FE0 /// Q5T3H4 /// Q5T3H5 /// Q8WW09	1553780_at
FLJ31715	0.8	0.97	B5MC89 /// B5MCK0 /// B6ZDE2 /// B6ZDE5 /// B7WNS6 /// Q6YHU3 /// Q6YHU4 /// Q6YHU5 /// Q6YHU6 /// Q6ZT85 /// Q8IY32	1553775_at
DCBLD1	0.7	1.25	B7Z2D2 /// B7Z3H3 /// B7Z5I8 /// B7Z7E8 /// Q8NHQ1	1553768_a_at
JUB	0.5	0.75	Q53F37 /// Q9H029 /// Q9Y6B6	1553764_a_at
MCM9	1.94	0.74	B4DWJ8 /// Q8N2F6	1553759_at
FAM76B	0.64	0.73	A8K1N4 /// B7WNW7 /// Q7Z4Q2	1553749_at
FAM119A	1.76	1.23	A6PVS1 /// Q6UVY6	1553743_at
HEXDC	1.42	0.86	A8MUE8 /// A8MW92 /// A8MXR8 /// A8MZC9 /// Q86U89 /// Q9H8G4	1555866_a_at
CCDC123	0.96	0.73	B3KQ97 /// Q8N6S4	1553732_s_at
CCDC123	0.83	1.1	B2RBK2 /// Q8NCP5 /// Q9NZX4	1563919_a_at
C6orf170	0.97	0.78	B2RBK2 /// Q8NCP5 /// Q9NZX4	1553726_s_at
ZNF644	1.37	0.72	B4DG95 /// B4DIJ3 /// Q96S19	1553725_s_at
ZNF548	1.37	1.34	A6NET8 /// A8K0Y8 /// A8MWI4 /// B4DHE2 /// Q2M3X9 /// Q5JUW0	1553719_s_at
ZNF548	1.54	1.42	B3KME2 /// B3KQR7 /// B3KS71 /// B3KUP0 /// B3KX16 /// B4DPA3 /// O75718 /// Q8NB01	1553718_at
YTHDF3	0.86	0.74	O95037 /// Q6FIF1 /// Q9UBS3	1564053_a_at
C16orf14	0.82	0.92	B4DQT3 /// Q8NG48	1553715_s_at
PRPF38A	1.16	1.1	Q53HJ7 /// Q9Y5L2	1553709_a_at
ZNF791	1.07	1	A5YM67 /// A8K5A7 /// B3KVP2 /// Q6Y2X3 /// Q96M65 /// Q9C062	1553704_x_at
ZNF791	0.92	1.14	A8MQD4 /// B8ZZQ0 /// Q7Z3K6	1553703_at
ZNF569	0.68	0.68		1553696_s_at
PIK3C2A	1.12	0.87		1553694_a_at
CBR4	0.83	1.22	O43693 /// Q03923 /// Q49A12 /// Q6NVI0 /// Q96HE0	1553693_s_at
B3GALNT2	0.96	1.07	B4DLH2 /// B4DS67 /// Q8N357	1553691_at
METTL6	0.99	0.99	A6NLF3 /// B4DTY7 /// B4E1M3 /// B7ZM29 /// B9EGK4 /// Q5T5P0 /// Q5T5P1 /// Q5T5P2	1553689_s_at
SP1	1.18	1.39	A8MVX1 /// P58511 /// Q8TCY0	1553685_s_at
VKORC1L1	1.1	1.45	Q09019 /// Q8WUW6	1553679_s_at
ITGB1	0.84	0.94	Q8NFZ4	1553678_a_at
TIPRL	1.03	0.81	B4DIR3 /// P16234 /// Q6UN15 /// Q9P071	1553677_a_at
ENAH	0.76	0.81	A2A281 /// A2A282 /// A8K7F7 /// B4DNB3 /// B4DWX5 /// Q5HYB3 /// Q5TI86 /// Q9Y3I1	1553672_at
SNAPC5	0.93	1.05	O75529 /// Q5TDI5 /// Q5TDI7	1554093_a_at
LOC150197	1.01	1.38	Q9Y236	1553658_at
SYT14	1.31	1.25	A8K1L7 /// B2ZRE2 /// B2ZRG2 /// B4DGU4 /// B4DL06 /// B4DSW9 /// B5BU28 /// P35222	1553654_at
HDX	0.97	1.16	B2RXG5 /// Q8IW88 /// Q8N572 /// Q96I51	1553646_at
FOXC1	0.43	0.73	B2RCP5 /// B4DHK9 /// B4DWQ5 /// P61160 /// Q8IY98	1553613_s_at
ZNF354B	0.94	0.67	A8K6T6 /// Q15035	1553612_at
ND3 /// SH3KBP1	0.83	0.94	Q8IU99	1553588_at
POLE4	0.7	0.86	B4DI74 /// B4DYJ8 /// B5BUA5 /// Q13362 /// Q6ZN33 /// Q7L7W2 /// Q86U13 /// Q96B13 /// Q96L51 /// Q96L52	1553587_a_at
SFRS12IP1	0.77	0.93	B4DI74 /// B4DYJ8 /// B5BUA5 /// Q13362 /// Q6ZN33 /// Q86U13 /// Q96B13	1553581_s_at
ND6	0.62	0.96	A8K2M7 /// B7Z5Y3 /// Q05C90 /// Q7Z401	1553575_at
COX2 /// ZFYVE20	0.92	1.07	O75663	1553570_x_at
COX2 /// ZFYVE20	0.87	1.08	B4DIV4 /// B5MD63 /// Q9NXP7	1553569_at
LOC100133315	0.78	0.98	A6NHF4 /// A6NM10 /// B2RXL4 /// Q8IUS6 /// Q8IXF9	1553567_s_at
DDAH1	0.7	0.85	Q8TDG4	1553565_s_at
ND2	0.52	0.79	Q69YX3 /// Q6AW87 /// Q7Z4D5 /// Q8N2A9 /// Q8N5Z4 /// Q8WW22	1553551_s_at
COX1	0.95	1.08	A8MYM9 /// B5MCT9 /// Q08AL9 /// Q6ZWJ1	1553538_s_at
RANGAP1	0.93	1	B4DWD9 /// Q8TCX1	1553535_a_at
TAF5	0.84	0.61	A2A2M1 /// B2R5S3 /// B3KMA5 /// B4DHP7 /// B4DNL7 /// B4DXH0 /// B4DXK9 /// Q53FP3 /// Q5QP19 /// Q8WV90 /// Q9Y697	1553528_a_at
RQCD1	0.93	0.96	O95336	1553510_s_at
C16orf81	1.22	1	A6NI77 /// A8MZE8 /// B1AN89 /// B1AN91 /// B1AN92 /// B4DH17 /// B4DXR2 /// B4DZE1 /// B9EGQ7 /// O43432 /// Q504Z1 /// Q59GJ0 /// Q5SWD0 /// Q5SWD1	1553449_at
HFE	1.4	1.5	A8K0U7 /// B7Z1H8 /// P47869 /// Q8TBI4	1553402_a_at
C3orf33	0.91	0.56	A8K1S5 /// B4DK41 /// B4DK52 /// Q15034 /// Q4W5H5 /// Q8IXX3	1554176_a_at
C1orf55	1.01	1.13	Q8TCW6	1553338_at
ZNF382	1.7	0.92	Q8WTX0 /// Q9UK39	1561687_a_at
TEAD1	0.84	0.89	Q8WYL5	1553322_s_at
LSM14B	1.01	1.17		1553304_at
DGKH	1.22	1.19	B3KXG5 /// B3KY15 /// O94915 /// Q6AI58 /// Q6ZNE6 /// Q6ZR29	1553300_a_at
C7orf51	1.38	1.02	B4E0N8 /// B4E210 /// Q5SSJ5	1553288_a_at
ZNF555	0.84	0.84	B4E0Z5 /// Q6NXR2	1553286_at
PUS10	1.07	1.51	A8K583 /// B4DF54 /// B4E187 /// B5MDV1 /// B7ZLD1 /// Q14966 /// Q57Z90 /// Q6ZQV0	1553280_at
SNRNP48	1.81	1.39	A8K9K9 /// B3KVT3 /// O43405 /// Q6ZP09 /// Q96IU6	1553274_a_at
CCDC89	0.99	0.93	A7MD03 /// B3KX22 /// B4DS55 /// Q5JPD9 /// Q75N11 /// Q75N12 /// Q86TJ6 /// Q96JG6 /// Q9NXR2	1553228_at
BRWD1	1.25	0.88	O15013 /// Q2KHR8 /// Q69YW1	1553227_s_at
ZNF583	0.83	0.78	B3KRW6 /// Q8NDH6 /// Q96Q33	1553221_at
ZNF512	1.09	0.83	A6H8M6 /// Q5SRI9 /// Q8WWX4	1553218_a_at
NEGR1	0.89	1.42	A8K4G0 /// B4DQ71	1553194_at
ZNF441	0.91	0.87	A6NC58 /// A6NHB5 /// A6NHN7 /// A6NL54 /// A8K3Z7 /// Q14202 /// Q96E26	1553193_at
ZNF441	1.1	1.13	A6NC58 /// A6NHB5 /// A6NHN7 /// A6NL54 /// A8K3Z7 /// Q14202 /// Q96E26	1553192_at
DST	1.07	1.14	A8MTQ7 /// A8MUG8 /// B7Z1D5 /// B7Z6E8 /// Q5JPT1 /// Q5JPT2 /// Q5JPT3 /// Q5JPT4 /// Q5JPT5 /// Q5JPT6 /// Q5VSN0 /// Q96B97	1553191_at
RASEF	0.93	1.04	Q7Z5G4	1553186_x_at
RASEF	0.89	1.04	Q8WVJ9	1553185_at
DDX31	0.78	0.57	B4DHR4 /// B4DZG4 /// O95847 /// Q5VTS5 /// Q5VTS6 /// Q5VTS9 /// Q8N518	1553181_at
ZNF777	0.68	0.83	B0QZE2 /// B0QZE3 /// B0QZE4 /// B0QZE5 /// B7Z293 /// B7Z2J6 /// B7Z3W2 /// B7Z3Z1 /// Q15326 /// Q2LD45 /// Q2LD46 /// Q2LD47 /// Q2LD48 /// Q5BJG6 /// Q5UGI2 /// Q5VUI0 /// Q6PJR5 /// Q8N4B3	1553172_at
SEPSECS	0.96	1.71	B4DWW2 /// Q8NEM0	1553167_a_at
C19orf55	1.35	1.11	Q9NXN4	1553162_x_at
C3orf34	1.39	1.21	Q96BD5	1553158_at
SNX13	2.05	1.35	A8MTW7 /// B3KQR1 /// Q9NY35	1553148_a_at
C13orf31	1.12	1.56	B2R5Q2 /// O00400	1553142_at
C13orf31	0.71	0.9	B5MC63 /// B7WPD7 /// B7ZKY5 /// B7ZKY7 /// Q6ZMI0	1553141_at
PELO	0.57	0.42	Q5T9E9	1553140_at
RBAK	0.82	0.67	B4DFY4 /// B4DQU9 /// B7WPE8 /// Q6N055 /// Q9H7U1	1553122_s_at
THEM4	0.87	1.31	B4DFY4 /// B4DQU9 /// B7WPE8 /// Q6N055 /// Q9H7U1	1553118_at
STK38	1.31	1.31	B7ZAQ0 /// Q6MZU8 /// Q8IXL7	1553117_a_at
CDK8	0.85	0.99	B7ZAQ0 /// Q6MZU8 /// Q8IXL7	1553113_s_at
CDK8	0.59	1.03	A6NMU8 /// B4DHI3 /// Q8N5B6 /// Q8NFZ3	1553112_s_at
KBTBD6	0.99	1.23	A8K9B0 /// B3KQJ0 /// B4DWS6 /// Q53GQ0 /// Q96EA9	1553111_a_at
C5orf24	1.38	1.65	B4DDJ8 /// B4DPS2 /// B4DWE3 /// B4DZW5 /// Q9BQ65	1553108_at
C5orf24	1.2	1.07	B3KRE8 /// B4DK64 /// Q76I76	1553107_s_at
C5orf24	0.73	0.88	B3KUZ9 /// Q8IYT8	1553106_at
NFX1	0.91	1.02	Q6ZP36	1553103_at
ALKBH5	0.88	0.9	A2RUL1 /// Q6ZP36 /// Q6ZS30	1553101_a_at
TIGD1	0.67	0.86	B3KTZ3 /// B3KY49 /// B7Z4G6 /// Q3MI96 /// Q8NFB2 /// Q8TCB3	1553099_at
ITGB1	0.88	0.81	A6NLI7 /// A8K2T0 /// B7Z666 /// Q5T4D3	1553530_a_at
BCL2L11	0.74	0.91	A8K2T0 /// B7Z666 /// Q5T4D3	1553096_s_at
SLFN5	1.35	1.83	B7Z8W2 /// Q5JUX0	1553055_a_at
PIP4K2B	1.18	1.41	Q8WTY6	1553048_a_at
SDCCAG8	1.08	1.14	A8MTF7 /// B4DVQ2 /// B5MC24 /// Q96EV2	1553034_at
SUOX	1.21	0.66	A8MTF7 /// B4DVQ2 /// B5MC24 /// Q96EV2	1553030_a_at
RECQL4	0.94	1.15	P58753 /// Q56UH9	1553015_a_at
SCAMP1	0.88	0.8	A8K0P4 /// Q9Y3A5	1552978_a_at
CNPY3	0.95	0.91	B4DYP7 /// Q5T8L2 /// Q96CW5	1552977_a_at
MMEL1	0.72	1.37	B4DI10 /// B4DKG0 /// Q5TDE2 /// Q5TDE3 /// Q5TDE4 /// Q5TDE5 /// Q5TDE6 /// Q6P2H8	1552930_at
FIGNL1	0.98	1.36	A8K0W5 /// B4E230 /// Q6ZRR5	1552921_a_at
SEC16B	1.05	0.89	Q96EF9 /// Q96K31	1552880_at
CACNG6	1.48	1.02	B5MD70 /// B5MDK3 /// Q9NVK5	1552863_a_at
TMEM148	1.36	1.54	A8K681 /// B4DR90 /// O15269 /// Q59EQ4 /// Q6NUL7 /// Q96IX6	1552856_at
PNN	0.88	0.88	B2R9G8 /// B7Z7A4 /// B8ZZX4 /// O14530 /// Q53HG4 /// Q8TB70	1567214_a_at
ADAMTSL1	1.9	2.2	Q659C4	1552808_at
ZNF547	1.89	1.63	O43167	1552794_a_at
SOCS4	0.41	0.78	O43167	1552792_at
SEC62	0.97	0.92	A8K4A0 /// P15848 /// Q8N322	1552790_a_at
SEC62	0.75	0.79	Q6PGP7	1552789_at
ZNF781	0.39	1.01	B4DIJ5 /// B4E0P0 /// B7Z3D4 /// B7ZA23 /// Q69YP8 /// Q6IPD7 /// Q8IVX5 /// Q8NCI3 /// Q9HD67	1552785_at
ST7L	0.7	0.62	A8K1J5 /// Q5T6A0 /// Q5T6A1 /// Q6P2R3 /// Q8IYX8	1552739_s_at
ST7L	0.67	0.66	A4D155 /// A8K7R3 /// B2R5R1 /// B4DKZ5 /// B4DLJ7 /// B4DLL5 /// B4DLL8 /// B4DN79 /// B4DZS5 /// B4E3D4 /// Q14956 /// Q8IXJ5 /// Q96F58	1552738_a_at
PCDHGA4	1.02	1.02	B4DDJ8 /// B4DPS2 /// B4DWE3 /// B4DZW5 /// Q9BQ65	1552735_at
KLHDC1	1.27	0.96	A8K9Y5 /// B7Z3I4 /// O14647 /// Q3YLD5 /// Q3YLD6 /// Q6AI05 /// Q8N677 /// Q96IP5	1552733_at
RHOXF1	2.49	1.58	A8K8T3 /// B7Z1Q0 /// P52848	1552724_at
FGF1	1.03	0.87		1552721_a_at
DTD1	0.83	0.94	B2RXG7 /// B4E3K4 /// B5MDA3 /// B5ME67 /// B7ZW32 /// Q8N1W1	1552718_at
SPEF2	1.51	1.63	B2RXG7 /// B4E3K4 /// B7ZW32 /// Q8N1W1	1552716_at
CYB5D1	1.05	1.09	A8K0V9 /// A8K8U4 /// A8MTM4 /// A8MZ79 /// B3KMU3 /// B4DGZ3 /// O94972	1552711_a_at
DUSP19	1.28	1.16	B2RBH2 /// B3KQI8 /// B3KQK1 /// P21589 /// Q53Z63 /// Q5JRQ1 /// Q5JRQ2 /// Q6NZX3 /// Q96B60	1552705_at
CARD16 /// CASP1	0.28	0.68	B3KP71 /// B4DQP6 /// B5ME50 /// B9TX29 /// B9TX30 /// B9TX31 /// B9TX32 /// B9TX33 /// B9TX34 /// B9TX35 /// B9TX36 /// B9TX37 /// B9TX38 /// B9TX39 /// B9TX40 /// B9TX41 /// B9TX42 /// B9TX43 /// B9TX44 /// B9TX45 /// B9TX46 /// B9TX47 /// B9TX48 /// Q71MG4 /// Q71SY5	1552703_s_at
CARD16	0.21	0.62	O15453	1552701_a_at
SLC2A13	0.54	0.44	Q8N8E1	1552695_a_at
CASC5	1.12	0.66	Q96AH8	1552680_a_at
SLC9A7	0.61	0.6	Q96FH0	1552671_a_at
PPP1R3B	0.8	0.73	B4DJT1 /// Q5JQQ2 /// Q5JQQ4 /// Q9BVM2	1552670_a_at
LOC84989	0.91	1.39	Q6P5X5	1552665_at
FLCN	1.16	0.97	B2R993 /// B7Z2D6 /// B7Z6W5 /// P35520 /// Q3LR94 /// Q5CCK7 /// Q96EH7 /// Q9NTF0	1552664_at
C5orf22	1.01	1.11	Q96EY9	1552660_a_at
NAV3	0.47	0.74	A6NIJ1 /// Q05DJ0 /// Q5JZH3 /// Q5JZH4 /// Q5JZH5 /// Q5JZH7 /// Q8WUR6 /// Q8WY78 /// Q969T3	1552658_a_at
ACBD5	0.7	0.93	A6NIJ1 /// Q05DJ0 /// Q5JZH3 /// Q5JZH4 /// Q5JZH5 /// Q5JZH7 /// Q8WUR6 /// Q8WY78 /// Q969T3	1568877_a_at
PHC3	0.94	1.18	B4E1R8 /// B4E2R8 /// Q8WYG0 /// Q96Q45	1552644_a_at
ZNF626	1.41	0.9	B5MC63 /// B7WPD7 /// B7ZKY5 /// B7ZKY7 /// Q6ZMI0	1552643_at
ZNF101	0.61	0.44	A8K030 /// Q96F25	1552634_a_at
ZNF101	0.56	0.76	B7Z3D8 /// B7Z7Q7 /// B8ZZX3 /// B9EK71 /// Q502W6 /// Q53QF1 /// Q53RD3	1552633_at
ARSG	1.03	0.88	Q5RKV6	1552632_a_at
HERPUD2	1.04	1.03	Q96RJ0	1552628_a_at
ARHGAP5	0.86	0.89	B2R712 /// Q8IZ81	1552627_a_at
TRNT1	0.74	1.03	A5LGC7 /// Q8WU03	1552625_a_at
LOC100134053 /// LOC441259 /// PMS2L12 /// POLR2J2 /// POLR2J4	0.78	0.67	Q5T483	1552622_s_at
POLR2J2	1.07	0.8	Q0VG00 /// Q4G180 /// Q59FB0 /// Q96H40	1552621_at
ANLN	1.14	0.77	O94914 /// Q8IV33	1552619_a_at
STX6	1.04	1.13	Q9H5J0	1552618_at
RFWD2	0.82	0.86	Q8N5J4	1552617_a_at
C15orf57	0.96	0.78	Q8NA61	1560814_a_at
CDC42SE2	0.77	0.87	P59091	1552613_s_at
CDC42SE2	0.51	0.65	B2CML4 /// Q6ICH2	1552612_at
JAK1	1.3	1.1	B2R9P8 /// B4DX97 /// Q8TAL5	1552611_a_at
JAK1	1.43	0.98	A8K5F6 /// B4DG85 /// Q8N8B7	1552610_a_at
C6orf114	0.68	0.75	B9EGC3 /// Q8TCG1	1554486_a_at
TMEM74	0.88	0.64	B4DWM3 /// Q8N6F8	1552520_at
KCNE4	5.39	2.76	Q6ZS86	1552508_at
RHBDL2	0.59	1.92	Q6NSE6 /// Q96A28	1552502_s_at
LACE1	1.42	1.72	A6NP01 /// B3KV41 /// B4DR30 /// Q9NXL9	1552490_at
BNC1	1.08	1.34	B2R9C2 /// Q5HYJ3	1552487_a_at
LACTB	0.61	0.69	Q8WXB1	1552486_s_at
LACTB	0.59	0.64	B7UUP6 /// B7Z2X3 /// B7Z4F0 /// Q8WVB3	1552485_at
MAN1A2	0.68	0.52	B9EGA6 /// Q8WUL5 /// Q96ST8	1552481_s_at
PLCD3	0.85	0.9	B9EGA6 /// Q8WUL5 /// Q96ST8	1552476_s_at
GAMT	0.9	0.76	A2A304 /// A8MSY5 /// Q5SZD6 /// Q96NH3	1552474_a_at
ACAP2	1.18	0.95	A2RU71 /// A7E234 /// Q2TAM0 /// Q569I6 /// Q8NEI6 /// Q9H582 /// Q9H835 /// Q9H8J8 /// Q9NVH8 /// Q9NZF0	1552472_a_at
ADAMTSL1	1.72	1.55	B4DR23 /// Q8NEK5	1552457_a_at
PRUNE2	1.96	1.78	B4DR23 /// Q8NEK5	1552455_at
ZNF485	0.72	0.71	B7Z776 /// Q96J99 /// Q9BUT9	1552427_at
TM2D3	0.89	0.94	Q96MZ4	1552426_a_at
ETV3	1.06	1.54	B2RDP2 /// Q8NAV1	1552423_at
NEDD1	0.66	0.92	A8MXY6 /// B7Z4R7 /// B7Z586 /// Q3KP31	1552417_a_at
RDH10	1.63	0.97	A8K1S2 /// A8MY40 /// Q17RR6 /// Q5MCW4	1552378_s_at
FAM18B2	0.73	0.81	B7Z889 /// Q659G8 /// Q86UT6	1552377_s_at
ZNF333	0.53	1.34	B0LPH2 /// B4DG55 /// B4DRX6 /// B4E2G4 /// O00443	1552375_at
C4orf33	1.73	1.39	B4DSP7 /// Q8N4T8	1552370_at
SCIN	1.19	0.36	Q8NCR0	1552367_a_at
SCIN	0.92	0.31	B5BUA4 /// Q5FBB7	1552365_at
TIRAP	1	0.9	Q96B23	1552360_a_at
SLC25A43	0.92	1.03	B2R4Y6 /// P08047 /// Q59EY3 /// Q9NR52	1557411_s_at
CRYZL1	1.24	1.31	Q8N1E6	1552347_at
CNOT7	0.64	0.75	B2R6X4 /// P14222	1552344_s_at
TRIOBP	1.62	0.77	P05556 /// Q5T3E4 /// Q5T3E5 /// Q5T3E6	1552334_at
MGC16385	0.71	1.11	O75663	1552330_at
RBBP6	0.85	1.02	A8K2B4 /// Q8N8S7	1552329_at
FAM122C	1.69	0.81	B3KP65 /// B4DEQ7 /// B4DU23 /// B4E0T7 /// Q96II8	1552323_s_at
EYA3	1.19	1.01	Q96HJ3	1552314_a_at
MFAP3	0.8	1.04	A8K7N6 /// O75971	1552312_a_at
C15orf40	1.15	1.09	Q6ICL0	1552310_at
NEXN	0.46	0.99	A1L3Y1 /// B1AJU0 /// B1AJU1 /// Q8NB59	1552309_a_at
TTC39C	1.33	1.26	Q8N8U2	1552307_a_at
ALG10	0.75	0.67	B7ZL18 /// Q7Z353	1552306_at
TMEM106A	0.72	1.01	A6H8H3 /// Q6ZMZ3	1552303_a_at
TMEM106A	0.98	0.99	Q8N7M0	1552302_at
CORO6	1.11	1.55	B2R912 /// B9EH04 /// Q4ZJI4	1552301_a_at
SLC39A13	0.77	1.01	Q8NA03	1552295_a_at
PIGX	0.72	0.68	B7Z324 /// Q8N7P1	1552291_at
AFG3L1	0.74	0.98	A3KPE3 /// Q12948 /// Q8WXT4	1552287_s_at
SAMD11	1.21	1.79	Q96LW1	1560477_a_at
SLC46A1	1.04	1.07	Q5HYK4 /// Q6ZR43 /// Q86UQ4	1552279_a_at
C9orf30	0.67	0.65	B5MCN0 /// B7WP67 /// B7Z1X2 /// B7Z2H0 /// B7Z8V5 /// B7ZA64 /// Q8NHH9	1552277_a_at
PXK	1.19	1.13	Q8IZU3	1552275_s_at
PXK	1.11	0.96	P51460 /// Q6YNB5	1552274_at
MAPK1	1.02	0.73	A4GWW4 /// A4ZN04 /// A4ZYK1 /// A5WZG6 /// A5WZG8 /// A5WZL4 /// A5WZL6 /// A5X014 /// A5X0Q2 /// A5X0Y8 /// A5X1A4 /// A6YXV4 /// A6Z8G6 /// A6ZGZ8 /// A9LYR7 /// B1NVH3 /// B1W6Z3 /// B2XLB2 /// B2XPV3 /// B2XQE7 /// B7Z1D5 /// B7Z6E8 /// O21102 /// P03897 /// Q27H02 /// Q2HK90 /// Q4EWX2 /// Q4F2M4 /// Q4F4E8 /// Q4F698 /// Q4VFA1 /// Q58F37 /// Q5JPT5 /// Q5JPT6 /// Q6VH98 /// Q6VHF8 /// Q6V…	1552264_a_at
MAPK1	1.14	0.83	A8MUW3 /// Q9NR33	1552263_at
TTLL12	0.76	0.85	B5ME40 /// Q8N9Q2	1552257_a_at
SCARB1	0.94	0.84	A0S9S4 /// A1DUW2 /// A1DVF7 /// A1DVP8 /// A4ZMD8 /// A6YWD9 /// A6YX87 /// A6YXB3 /// A6YXL7 /// A6YZJ2 /// A6Z1T4 /// A6Z8R1 /// A6ZBM4 /// A6ZDH3 /// A6ZHQ4 /// A7LE18 /// A7LER5 /// A7XTS4 /// A8R1N6 /// B0Z776 /// B1PIK4 /// B1W9K7 /// B2D3W3 /// B2D5P9 /// B2XHG7 /// B2XQV4 /// B2Y8L1 /// B2YBG2 /// P03923 /// Q0G8P9 /// Q0ZEY1 /// Q20CU2 /// Q2HLE2 /// Q305R6 /// Q305V5 /// Q305Y1 /// Q4E…	1552256_a_at
	0.55	0.45	A0S0W7 /// A0S2P1 /// A0S3T1 /// A0SA07 /// A1Z455 /// A1Z4V2 /// A4ZKZ0 /// A6YW54 /// A6YWD1 /// A6YXV0 /// A6Z3M5 /// A6Z6E8 /// A6ZEU4 /// A6ZF47 /// A6ZFK3 /// A6ZHA9 /// A7LDC6 /// A7LF11 /// A7LFA2 /// A8K5H3 /// B0Z6W4 /// B1W855 /// B2CB37 /// B2WRY8 /// B2XHF9 /// B2XHT9 /// B2XIR3 /// B2XL43 /// B2XP28 /// B2XPS3 /// B2YKU2 /// B3DE06 /// B3GUF3 /// B4DWY8 /// P00403 /// Q06TE6 /// Q09…	244885_at
LMLN	0.89	0.87	A0S0W7 /// A0S2P1 /// A0S3T1 /// A0SA07 /// A1Z455 /// A1Z4V2 /// A4ZKZ0 /// A6YW54 /// A6YWD1 /// A6YXV0 /// A6Z3M5 /// A6Z6E8 /// A6ZEU4 /// A6ZF47 /// A6ZFK3 /// A6ZHA9 /// A7LDC6 /// A7LF11 /// A7LFA2 /// A8K5H3 /// B0Z6W4 /// B1W855 /// B2CB37 /// B2WRY8 /// B2XHF9 /// B2XHT9 /// B2XIR3 /// B2XL43 /// B2XP28 /// B2XPS3 /// B2YKU2 /// B3DE06 /// B3GUF3 /// B4DWY8 /// P00403 /// Q06TE6 /// Q09…	244881_at
RBBP4	1.88	0.91	A0S0T0 /// A0S0Z5 /// A0S1G1 /// A0S208 /// A0S2B3 /// A0S2H8 /// A0S2R9 /// A0S2V8 /// A0S3K5 /// A0S3X2 /// A0S437 /// A0S525 /// A0S590 /// A0S8D6 /// A0S9D7 /// A0SB36 /// A0SBS0 /// A0SBU5 /// A0SBX2 /// A0SCX3 /// A1DT13 /// A1DTA5 /// A1DTI3 /// A1DV59 /// A1DV99 /// A1DVF0 /// A1DVF1 /// A1E1E3 /// A1E1T6 /// A1Z496 /// A1Z4E8 /// A1Z4G1 /// A1Z4L3 /// A1Z519 /// A3FPA1 /// A3R095 /// A3R…	244872_at
USP32	1.06	1.15	B1AKK2 /// B4DGT0 /// B4DYP1 /// B4E3V1 /// O94760 /// Q5HYC8	244871_s_at
	1.83	1.1	Q8WVE6	244859_at
DSEL	0.67	0.51	A0S231 /// A0S244 /// A0S296 /// A1DTN1 /// A1E1D9 /// A1E1P3 /// A1Z593 /// A4ZKY8 /// A4ZL79 /// A4ZLF7 /// A4ZLH0 /// A4ZLR1 /// A6YUF6 /// A6YZ26 /// A6Z529 /// A6Z655 /// A6Z7V2 /// A6Z8H3 /// A6Z9Z3 /// A6ZAC3 /// A6ZCL4 /// A6ZFB0 /// A6ZFE9 /// A6ZGG3 /// A6ZGN8 /// A6ZH05 /// A6ZH82 /// A6ZHD2 /// A7IZ41 /// A7LD85 /// A7LDG3 /// A7LE21 /// A8JN25 /// A8QT63 /// A8WEK0 /// B0Z714 /// B0Z…	244852_at
	1.87	1.28	A0S183 /// A0S1I7 /// A0SCP2 /// A1DSF3 /// A1DTC8 /// A1DTW0 /// A1XP63 /// A3RMP9 /// A4ZL80 /// A4ZLB9 /// A5YMT3 /// A6NAM9 /// A6YTK8 /// A6YU66 /// A6YV28 /// A6YV54 /// A6YYA4 /// A6YYY8 /// A6YZK9 /// A6Z0P9 /// A6Z1V1 /// A6Z5Z1 /// A6Z6C1 /// A6Z6U0 /// A6ZA20 /// A6ZEY2 /// A6ZFK2 /// A6ZG99 /// A6ZGQ2 /// A7LEL7 /// A7LFE0 /// A7XSQ0 /// A8JLF0 /// B0Z6P8 /// B0Z6V0 /// B1NTV9 /// B1N…	244842_x_at
SEC24A	0.54	0.33	B0QYT4 /// B0QYT5 /// B0QYT6 /// B4DY16 /// B4E0U0 /// P46060 /// Q8WUS7 /// Q9BSK3	244841_at
C16orf52	0.73	0.94	Q86W26	244835_at
C1orf134	1.21	0.85	B2RTZ0 /// Q4KMX3 /// Q6AHW6 /// Q7Z682 /// Q86VR1 /// Q9HDC5	244834_at
NAF1	0.75	0.65	Q86W24	244828_x_at
	0.83	0.62	B2RE59 /// B4DJE1 /// B5MDQ4 /// B7Z1E5 /// Q92600	244826_at
PHIP	1.05	1.26	B5MCA8 /// Q8NBT3	244811_at
SQSTM1	1.07	0.85	Q5JRM7 /// Q8N9S7	244804_at
	0.79	0.61		244803_at
	0.8	0.84	B7ZBZ3 /// Q2M1U5 /// Q2M1U7 /// Q6XPR3 /// Q8N1M7	244788_at
YAF2	1.19	1.16	B2RPB9 /// Q8NA97	244783_at
DCP2	1	0.68	Q8NBR9	244777_at
PHACTR2	0.9	0.82	B8ZZU7 /// Q8WYK1	244774_at
	1.82	2.7	Q96LB2	244767_at
LOC440354 /// LOC595101 /// LOC641298 /// LOC728423 /// LOC729513 /// SMG1	1.02	0.93	Q96LR1	244766_at
	0.39	1.05	Q96LR1	244764_at
	0.97	0.89	A8WFP7 /// B2RNX5 /// B4DSP3 /// Q13315 /// Q59GH6 /// Q68DE6 /// Q6P7P1 /// Q7KYL7 /// Q8TDS0 /// Q8TDS1 /// Q8TDS2 /// Q96QM9	244753_at
	0.36	0.6	A8MXM6 /// Q6P1S2 /// Q96NB5	244749_at
ZNF138	0.73	0.65	Q969H1	244743_x_at
MGC9913	0.95	0.5	Q96MT0	244741_s_at
	1.38	1.6	Q4G0S8 /// Q68CP9 /// Q8NBP1 /// Q8WV72 /// Q96SQ4	244732_at
LOC100129195	1.09	1.26	A0JLR2 /// O43831 /// Q12986	244730_x_at
	0.95	1.22	A8K4P3 /// Q6IQ49	244728_at
NFYB	0.9	1.26	A8K0I1 /// B4DYW1 /// B4DZ34 /// Q86XP1	244704_at
IPO9	1.02	0.98	Q96N51	244703_x_at
	0.87	0.94	Q96LW2	244701_at
CDRT4	0.78	0.97	Q6ZVC0	244698_at
	1.11	0.77	B3LDG9 /// B3LDH0 /// B4DR62 /// Q96KR4	244688_at
DBT	1.29	1.16	A8K6R4 /// A8MUL8 /// Q3MIT2	244687_at
GLRB	1	0.26	Q8N1H2	244680_at
	0.7	1.35	A8WFQ3 /// B7Z7G8 /// Q3SXZ3 /// Q658L4 /// Q7Z7K8 /// Q8N2R1	244673_at
SNHG5 /// SNORD50A /// SNORD50B	1.63	1.74	A8K189 /// B4DL95 /// Q495M9	244669_at
	0.92	0.93	Q53TS8 /// Q8N7U5 /// Q96Q36	244663_at
	0.93	0.87	Q53TS8 /// Q8N7U5 /// Q96Q36	244661_at
ELAVL1	1.03	1.54	Q6RI45	244660_at
LOC100131015	0.72	1.13	Q2TAC2 /// Q8TE98 /// Q9NT49	244659_at
SETD7	0.88	1.48	A8K4E6 /// Q8N972	244653_at
	0.81	0.53	B2RMZ4 /// Q8NB91	244647_at
C7orf30	1	1.09	Q8N998	244641_at
ZNF850P	0.61	0.89	A5PLN2 /// Q5R2U4 /// Q5R2U5 /// Q5R2U6 /// Q5R2U7 /// Q5R2U8 /// Q5R2U9 /// Q6P2D1 /// Q9NSI6	244640_at
KCNQ5	0.96	1.49	A8K1V6 /// B1AQ29 /// P51814 /// Q59FE0	244623_at
ATF7	2.32	2.3	Q8N8Z8	244587_at
C8orf37	1.31	1.25	A8K4M1 /// Q8IZ41	244569_at
QSER1	1.26	1.23	B4DYZ1 /// B4E3G7 /// Q9H8H2	244563_at
ZNF788	0.9	0.96	Q3KR11 /// Q8N2J5 /// Q9ULD5	244552_at
CYCS	0.63	0.63	A1A4F3 /// A8K8W1 /// B7Z8P7 /// Q0D2P3 /// Q17RT1 /// Q9HD40	244546_at
	1.03	1.17	Q2NL68	244534_at
	0.74	0.91	A8MX07 /// Q96LK0	244533_at
ASXL1	0.99	1.01	Q8N8Y2	244519_at
PSMD7	0.8	1.17	B2RCI9 /// B3KN60 /// B4DGG2 /// B7WNN5 /// B8ZZT9 /// Q86XC4 /// Q9NSH0 /// Q9Y5W8	244515_at
	0.86	1.01	B3KPC1 /// B4DTY8 /// P56199 /// Q9BRX2 /// Q9UHT8	244511_at
GPR155	0.33	0.95	Q8IYW5	244509_at
	0.53	0.72	A6NC62 /// B9EGS1 /// Q9NYW8	244503_at
LOC440296	0.98	1.65	A6NG10 /// A8K0C9 /// Q5T1C6	244498_x_at
C18orf45	0.93	0.83	B2R6F9 /// Q15208 /// Q9UPD3 /// Q9UPD4	244495_x_at
	1.02	0.82	B4DJH7 /// B4DL75 /// P49336 /// Q64FY6	244487_at
	1.17	0.39	B4DS93 /// Q86V97	244486_at
SLC25A24	1.2	0.78	Q7Z6I8	244481_at
	1.49	1.61	Q7Z6I8	244474_at
ZNF224	0.78	0.86	A0JLR2 /// O43831 /// Q12986	244462_at
KIF23	0.87	0.9	B2R7M4 /// Q96P69	244427_at
	2.1	2.14	B4E0B1 /// B4E128 /// Q08AF3	244420_at
	0.64	0.92	A6NCS9 /// B4DLQ4 /// B4DRD9 /// B4DRG8 /// Q86SQ7	244417_at
	1.03	1.95	B2R6Y2 /// P51687	244411_at
STXBP4	1.41	0.9	B4DPE0 /// Q8IWU4	244404_at
LCA5	1.04	0.96	B8ZZV3 /// Q8NFR7	244401_at
	1.2	0.78	B5MDL2 /// B5ME78 /// Q9BT09	244397_at
G3BP1	1.25	1.15	A4Z946 /// B4DWC0 /// O95789 /// Q05D85 /// Q7L9K1 /// Q8NCS4	244396_at
TLK1	1.51	1.11	B9ZVQ2	244389_at
SLC1A4	0.47	0.69	Q8N8U3	244377_at
	0.96	1.13	B3KV57 /// B3KXE6 /// O60658 /// Q6P9H3 /// Q86XV4 /// Q96T71 /// Q9UMB5	244368_x_at
FBXL17 /// LOC100130089	1.31	0.75	B3KS82 /// Q495T6	244360_at
	1.5	1.55	A6ND79 /// B4DM34 /// Q5JPK0 /// Q8N5C8	244354_at
MYO10	1.73	1.55	B3KNH6 /// Q6PIW4	244350_at
	0.66	0.59	Q45KQ8 /// Q8IZJ0	244347_at
	1.24	1.02	Q96RL6	244341_at
TRAM1L1	0.59	0.74		244334_at
C18orf54	0.65	0.89	A6H900 /// B1AM31 /// B7Z878 /// Q5T1B0 /// Q8NDG7	244324_at
GTF2H5	1.3	1.05	B1AMD0 /// Q5VZ03	244294_at
UQCRB	0.92	0.63	Q6N001 /// Q7Z3G1 /// Q9P0U3	244293_at
LOC134466	2.01	1.78	A8K5Y0 /// B2RDW4 /// B4DZB7 /// Q33E94	244289_at
SFRS12	1.02	1	A8K3Q2 /// A8K7E1 /// Q496M8 /// Q6MZQ3 /// Q8N6G6	244287_at
	0.52	0.62	A8K5Z9 /// O14582 /// Q6IBE5 /// Q8IVP9	244280_at
	1.25	1.3	Q8N9H6	244271_at
LOC646214	0.67	1.03	B3KW39 /// Q5H9R6 /// Q8WXH5	244268_x_at
	1.46	0.73	Q8N8C0	244242_at
	0.45	0.61	A6NHA5 /// Q8WXI8	244241_x_at
IVNS1ABP	0.36	0.66	B2R9E7 /// Q8TA94	244235_at
	1.07	1.19	A7E2F3 /// B5MCF1 /// B7Z4I4 /// B7Z917 /// B7Z928 /// B7Z940 /// Q68D71 /// Q75N08 /// Q75N10 /// Q75N14 /// Q75N15 /// Q75N16 /// Q8N879 /// Q8N926 /// Q9UKV0 /// Q9Y6V1	244197_x_at
DNAJC22	1.17	1.16	B4DJ19 /// Q8N3J6	244193_at
LOC284900	1.07	0.76	Q6ISP1 /// Q6NT26 /// Q6NT60 /// Q96Q77	244189_at
	0.91	0.69	B3KTN0 /// B7Z354 /// B7Z3J2 /// B7Z7D4 /// B7Z8V6 /// Q5TEH7 /// Q5TEI0 /// Q8TDW4	244181_at
ZNF793	0.51	1.06	B3KTN0 /// B7Z354 /// B7Z3J2 /// B7Z7D4 /// B7Z8V6 /// Q5TEH7 /// Q5TEI0 /// Q8TDW4	244180_at
	0.78	0.84	Q9Y5G9	244177_at
	0.9	1.02	A8K0T4 /// A8K1F3 /// B4DG96 /// Q9UBL0	244149_at
	1.19	0.8	A8K147 /// B2R5T0 /// B5MCF4 /// P05230 /// Q16089 /// Q6LBM3 /// Q9UBK1	244145_at
ZNF518A	0.65	1.35	Q9C093	244132_x_at
	2.77	3.34	Q6P9G0	244130_at
GLIS1	0.51	1.25	A8K2W5 /// P28749	244128_x_at
UBR3	1.05	1	Q8WTR2	244121_at
C1orf55	0.8	1.02	Q8WTR2	244103_at
	0.72	0.96	A8K249 /// A8K257 /// B2R8U9 /// B4DKN4 /// B4DVD8 /// B5MDZ1 /// P29466 /// Q5EG05 /// Q5FBZ0	244101_at
	0.52	0.51	Q5EG05	244091_at
	0.87	1.16	Q86X07 /// Q96QE2	244075_at
C10orf72	2.62	1.33	A7E243 /// B4DVU4 /// Q7Z3S7	244058_at
C10orf72	2.49	1.5	Q14C79 /// Q4G141 /// Q5JWY7 /// Q96M20	244057_s_at
CBR4	1.55	1.48	Q05C46 /// Q8NG31	244052_at
PTPLAD2	0.97	1.04	B0YJC1 /// B4E2Q2 /// B4E3L3 /// Q6NZX9 /// Q96RU2 /// Q96SV4	244050_at
	0.82	0.92	B3KPP8 /// Q96T83	244049_at
C14orf145	0.85	0.97	Q86XI6	244033_at
	1.36	1.39	B2RAF7	244032_at
STYX	0.64	0.63	B4DR92 /// Q49AR2	244030_at
	1.11	1.16	A8MSV1 /// B3KQ56 /// B7Z2A7 /// B7Z2R7 /// B7Z9D0 /// Q5T8D3 /// Q5T8E0 /// Q8NCM9	244026_at
ZNF182	0.9	0.57	O00220	244024_at
ZNF462	0.79	1.36	B9EK70 /// Q68DY1 /// Q96QM1	244007_at
SLFN5	0.99	0.84	B3KUG7 /// Q0VDG9 /// Q504T0 /// Q8IZC7 /// Q96F93 /// Q9Y4S0	243999_at
PTAR1	0.68	1.05	B4DQ74 /// Q96EG1	243995_at
	2.27	1.61	O95382 /// Q32MQ5 /// Q5SSD2 /// Q5SSD4	243989_at
	3.08	1.58	A4D1Y8 /// Q9BSE4	243983_at
KLHL28	0.68	0.83	Q13017 /// Q7Z2X2	243982_at
	1.08	0.75	A8K2Z6 /// B7WP13 /// Q96Q11	243973_at
	1.06	1.22	A6NJ25 /// A6NK79 /// B0FP48 /// B4DJG3 /// Q59FR2 /// Q8TDE6 /// Q9GZM3 /// Q9H1A7	243966_at
	3.1	3.29	A6NJ25 /// A6NK79 /// B0FP48 /// Q59FR2 /// Q8TDE6 /// Q9GZM3 /// Q9H1A7	243964_at
LOC100128108 /// LOC400464	0.62	0.49	B2R652 /// B4DR17 /// O43752	243957_at
	0.87	1.12	A8KAL4 /// Q9BV29	243948_at
TSHZ2	3.02	3.01	P23458 /// Q0VGA4 /// Q4LDX3 /// Q6P669 /// Q8IV82 /// Q9UD26	243940_at
	1.65	1.15	Q96JD4	243931_at
KIAA1429	0.56	0.77	A8K735 /// A8MUI6 /// Q49AL5 /// Q4G0U7 /// Q8TD10	243927_x_at
UBLCP1	0.75	0.93	A1L472 /// B4DMP1 /// Q96NI8	243916_x_at
	0.91	0.95	A8K1M9 /// B4DY93 /// B7Z7T4 /// Q2VYF4	243910_x_at
	1.37	0.4	Q96DY2	243907_at
	1.12	0.99	Q96NL1	243904_at
SLC41A2	0.5	0.8	A5H1P5 /// B7Z275 /// Q2N1I0 /// Q8WWG9	243894_at
	0.77	0.79	B3KUN4 /// B7Z1Y9 /// B9EH75 /// Q9NX52	243887_at
CCDC80	1.12	1.54	A6NJN6 /// P17040	243864_at
	0.68	0.89	A6NJN6 /// P17040	243861_at
MORF4L2	1.2	1.25	B2R8X8 /// B4E1U5 /// B7Z6A7 /// Q5TAS6 /// Q96DU3	243857_at
LUC7L2	0.89	0.91	A6PVM0 /// A6ZJA2 /// Q8WV93	243852_at
	1.07	1	B7Z885 /// Q01954	243840_at
BRAF	1.26	0.94	P83111	243829_at
ZNF70	0.8	0.98	Q8N3E9	243816_at
	1.75	1.34	A8K2V4 /// Q15057	243813_at
CCBE1	2.74	2.71	A9UKE9 /// B4DKT7 /// Q5Q120 /// Q5Q121 /// Q5Q122 /// Q5Q123 /// Q96P15	243805_at
	0.83	0.82	B4DJW7 /// B4DQH8 /// B4DSQ3 /// B9EK61 /// Q58A63 /// Q59GL2 /// Q8WUY3	243801_x_at
ZNF585A	0.9	0.81	Q8N123	243790_at
ZDHHC20	0.86	0.85	B2R8D6 /// B4DSE6 /// Q8NCK3	243786_at
PDCD2	0.47	0.73	B2RDK9 /// B3KT51 /// B4DKG4 /// B4DLL2 /// Q9BRN9	243773_at
	0.9	1.01	B4E3M7 /// P41162	243768_at
CYTH3	0.95	1.23	A4QPA5 /// B7Z704 /// B7ZMM1 /// Q8N1N0	243752_s_at
	0.63	0.66	A8MVL9 /// A8MZ75 /// B2RNC6 /// Q2HXU8 /// Q5QGZ9	243751_at
C21orf70	0.98	1.39	Q6P6B1	243750_x_at
ZNF599	0.52	0.7	Q6P6B1	243747_at
	0.73	0.76	Q8IZV5	243740_at
DDAH1	0.52	1.16	Q8N1A6	243711_at
	1.18	0.86	A8K2U8 /// Q75MG0 /// Q8NBV9 /// Q9Y6U3	243704_at
	0.93	0.83	A8K2U8 /// Q8NBV9 /// Q9Y6U3	243702_at
MORF4L2	1.04	1.19	A6NHJ8 /// A6NJS9 /// A6NMA8 /// A6NND8 /// A8MZ10 /// B3KQ77 /// O95825 /// Q8TBV9	243683_at
	0.63	0.52	B3KM57 /// B3KN35 /// Q96IQ6 /// Q9UIV1	243673_at
	1.13	1.15	Q8NEC5	243671_at
ZNF273	1.58	0.44	B4DZQ0 /// Q147T5 /// Q7Z6E9 /// Q96BR4 /// Q9P1K4	243661_at
FBXO7	0.89	0.79	B3KQY3 /// B4DI96 /// Q6P187 /// Q6P4D5	243649_at
LOC100131402	0.89	0.83	A8K190 /// B1APR7 /// B4DIR7 /// B4DNZ7 /// B4E151 /// Q0P685 /// Q8IVX7 /// Q99504	243648_at
NFASC	0.75	0.93	B2RDK0 /// B4DKA1 /// P55082	243645_at
SLC30A6	0.71	0.79	Q8WUR7	243643_x_at
	1.35	1.54	B4DDI0 /// B4DPZ7 /// B4DUN9 /// B5ME05 /// Q0ZGT2 /// Q5CZ93 /// Q7Z4C7 /// Q86WF6	243642_x_at
	1.36	0.8	A8K8X3 /// Q5BKT4	243634_at
LOC727815	0.85	0.54	A8K2X2 /// Q96A25	243631_at
FGFR1OP2	0.93	0.96	A8MPS0 /// A8MWV3 /// B7WNS2 /// Q8IYS5	243619_at
ZNF827	0.48	0.94	Q96H72	243618_s_at
DENND5B	1.01	0.76	Q96A05	243613_at
FAM55C	0.92	0.71	B4DJ17 /// Q96NT5	243606_at
	0.65	0.87	Q8IZ63	243584_at
SPCS2	1.06	0.85	A8CZ64 /// B4DHN0 /// P28482 /// Q1HBJ4 /// Q499G7	243570_at
	0.87	0.97	B3LDG9 /// B3LDH0 /// B4DR62 /// Q96KR4	243560_at
	1.35	1.02	B2R6G9 /// B4DRH0 /// Q09028	243553_x_at
MBTD1	1.14	1.25	Q4VC15 /// Q6IRT0 /// Q7Z5T3 /// Q86WP5 /// Q8NFA0	243552_at
ZDHHC21	0.69	1.71		243550_at
PREPL	0.87	0.79		243542_at
KIAA1841	1.12	1.21	Q8IZU8 /// Q9HAD7	243539_at
MARS2	0.48	0.66	Q14563 /// Q75MQ2 /// Q86UJ2	243529_at
	1.97	2.21		243527_at
	1.23	1.11	B4E205 /// O95486	243521_at
	1.32	0.85	Q8C784 /// Q8NHV5	243515_at
	0.96	1.05	Q5TEV5	243514_at
	1.42	0.63		243511_at
	1.15	1.63	Q96HR8	243509_at
C20orf196	0.58	0.92		243508_at
C20orf196	0.79	1.23	A8KA32 /// B4DJ93 /// O14660 /// P22102 /// Q15374 /// Q3B7A7 /// Q52M77 /// Q59HH3	243507_s_at
	1	1.03		243501_at
RAB18	0.65	0.73		243496_at
	0.54	0.8	A7J992 /// Q8WWQ0 /// Q9NWP3	243495_s_at
LOC729120 /// THEM4	0.86	0.95	B3KQF7 /// B3KUH3 /// Q96CP6	243492_at
AFF4	1.56	1.34	B4E3V2 /// Q13501 /// Q9BRY4	243487_at
RIT1	0.85	0.88		243463_s_at
BNC2	0.87	0.75		243445_at
	0.76	2.21	A6NL56 /// A8K5P0 /// B4DFU3 /// B4DJQ9 /// Q8IY57	243442_x_at
LOC339290	1.14	1.12		243426_at
TNIP1	0.72	0.61	B7Z3U5 /// Q8IU60	243423_at
TTC30B	1.05	1.63	B2RWP7 /// B4DN76 /// B4DPB5 /// B4DTH7 /// O75167 /// Q5T3J4 /// Q5T3J5 /// Q5T4W4 /// Q5TF99 /// Q5TFA1 /// Q5TFA2	243413_at
	1.45	1.43		243405_at
	1.42	0.9	A6NC15 /// A6NDT6 /// A6NF30 /// A6NN41 /// B4DT39 /// B5MEI3 /// Q5BKU6 /// Q6AWC3 /// Q6P435 /// Q92617 /// Q96Q15	243388_at
	1.23	1		243371_at
CAPRIN1	1	0.79	B3KNV2 /// B4DG01 /// O75570 /// Q8N6Z2	243370_at
	1.08	0.98	B3KND9 /// Q0VGC3 /// Q6ZTN6	243367_at
	0.39	0.39		243366_s_at
NEGR1	1	1.18	A2RRP7 /// B3KP35 /// B4DFX2 /// B4DP87 /// P52744	243357_at
	0.76	0.61	B4DZL6 /// Q96HF5	243345_at
	0.97	0.75	Q6RI45	243343_at
	0.53	1		243338_at
FLJ27352	0.45	1.23		243309_at
	0.92	0.83	Q38IJ5 /// Q38IJ6 /// Q86XN8 /// Q8NI85	243305_at
	0.73	0.55	Q8NBA4	243302_at
VRK2	0.77	0.8	Q8NBE4	243299_at
ZNF780B	0.94	0.74	A8K7B9 /// P25208	243294_at
OSTM1	1.06	0.77		243287_s_at
	1.54	1.31	B4E0Q0 /// Q8N9R6 /// Q96ET8	243271_at
ATXN7	0.93	0.99		243259_at
MKNK1	1.07	1.16	B2R811 /// B4E1Q7 /// P11182 /// Q5VVL7	243256_at
	1.4	0.86	A8K3K2 /// P48167	243252_at
	0.77	1.01		243249_at
GTF3C4	1.02	1.09		243228_at
FAM20A	1.08	0.81		243221_at
	1.26	0.85		243216_x_at
TRAFD1	1.59	1.63		243196_s_at
ZNF283	0.68	1.11	B5WWL3 /// Q8WTS6	243188_at
LOC100130360	1.85	1.97		243179_at
	0.76	0.87	A4D154 /// Q96EH3	243176_at
	0.55	0.64		243174_at
SLC30A5	0.77	0.74		243166_at
	0.84	0.59	A6NKD4 /// A6PVT6 /// A8MSQ5 /// B4DS33 /// B4DSH4 /// B5MC83 /// B7Z9V5 /// B7ZL37 /// Q9NR82	243134_at
	1.62	1.44		243121_x_at
C6orf182	1.35	1.31	A6NL51 /// A7UKX7 /// A7UKX8 /// A7UKX9 /// A7UKY0 /// A8WFP2 /// B2R594 /// Q00987 /// Q86WA2 /// Q86WA3 /// Q86WA4 /// Q86WA5 /// Q8NDV9 /// Q8NDW0 /// Q8NDW2 /// Q8TE46 /// Q8TE47 /// Q8WYJ3 /// Q96DS0 /// Q96DS1 /// Q96DS2 /// Q96DS3 /// Q96DS4 /// Q96DS5 /// Q9H4C2 /// Q9H4C3 /// Q9H4C4 /// Q9H4C5	243118_at
C2orf49	1.08	1.37		243093_at
	0.69	0.91		243046_at
FAM73A	0.85	0.86	B3KWV1 /// Q2KHR3 /// Q9H6S7	243042_at
	1.2	1.29		243041_s_at
XIAP	0.9	0.63		243026_x_at
ZNF789	1.54	1.3	B2R4I1 /// P99999 /// Q6LER6	243024_at
	2.84	1.99	B1H0U8 /// Q9NRE2	243016_at
	0.53	0.45	A6NIZ6 /// B3KVI8 /// Q498B9 /// Q5JWS8 /// Q6P1M8 /// Q76L82 /// Q8IXJ9	243013_at
	1.24	0.78		243012_at
MSI2	0.65	0.72	B2RD27 /// B4DXI8 /// P51665	243010_at
	0.6	0.85		243007_at
MTRF1	0.71	0.68		242996_at
	0.85	0.91	B2RAB7 /// B4DH40 /// B4E0W5 /// Q24JQ0 /// Q7L033	242994_at
	0.99	1.18		242990_at
	1.14	1.12	Q6UW64 /// Q8NF15	242986_at
MKLN1	1.28	1.19	B4E290 /// B7ZAI9 /// B7ZB41 /// Q6NUK1	242984_at
	1.17	0.93		242981_at
IRS1	1.01	0.81	A2RU59 /// B4DL48 /// O75077 /// Q53RX4 /// Q53TC0 /// Q53TK5 /// Q9UKK1	242979_at
	1.38	0.9	A8MV89 /// B4DIW7 /// B4DQ24 /// B4DW07 /// B4E2A4 /// B7WNS8 /// Q5M775	242975_s_at
CACNA1C	1.91	0.59		242973_at
	2.56	1.53		242966_x_at
DDX58	0.26	0.97	A8MWS2 /// B2RPJ8 /// Q7Z699	242961_x_at
ZNF234	1.14	1.32		242953_at
TFDP1	1.11	1	B4E1K0 /// Q02241	242939_at
FOXK2	1.29	0.9		242938_s_at
	0.81	1.02		242934_at
	1.32	1.69		242932_at
	0.54	1.69	A4FU45 /// A8K8U0 /// P17024 /// Q86XA2 /// Q8N457 /// Q96I27 /// Q9H942	242928_at
ZNF678	0.85	0.72	A8MYM9 /// B5MCT9 /// Q08AL9 /// Q6ZWJ1	242923_at
ZNF253	0.89	1.13	B3KSP5 /// Q5T5D7 /// Q5T5D8 /// Q5T5D9	242919_at
ZNF682	0.9	1.14	B7Z8K4 /// Q13283 /// Q32P45 /// Q53HH4 /// Q5HYE9 /// Q5U0Q1 /// Q6FI03 /// Q6ZP53	242915_at
	1.32	1.32		242907_at
PNO1	0.61	0.89		242905_at
ALG10B	0.91	0.87	A8K568 /// B7Z355 /// B7Z6K1 /// Q8NCE0	242900_at
	1	1.85		242893_at
	1.02	0.98	B2R7N6 /// B7Z3C0 /// B7Z561 /// B7Z9M1 /// P43007 /// Q53F03 /// Q9P2X2	242890_at
	0.68	0.78		242888_at
KCMF1	0.73	1		242887_at
	0.63	1.21	O75941	242879_x_at
	0.95	0.84	B0LPI0 /// B4DXG4 /// Q96J92	242865_at
	2.61	1.79		242862_x_at
	0.64	0.89		242856_at
KIAA1919	1.05	0.99		242851_at
C11orf30	1.39	1.36	A6NI33 /// B4DYY6 /// B8ZZY1 /// Q75T13	242847_at
	1	1.71	Q9NXN1	242845_at
PGGT1B	0.73	1.04	A8MWY0 /// B4DJV3 /// B4E116 /// B5MDQ3	242844_at
	0.53	1.67	B4DPT3 /// P17927 /// Q16521 /// Q16744 /// Q5SBJ5 /// Q5SBJ6 /// Q5SBJ7 /// Q5SBJ8 /// Q5SBJ9 /// Q5SBK0 /// Q5SBK1 /// Q5SBK2 /// Q5SBK3 /// Q5SBK4 /// Q5SBK5 /// Q5SBK6 /// Q5SR40 /// Q5SR41 /// Q5SR42 /// Q5SR43 /// Q5SR44 /// Q9HB98 /// Q9HB99 /// Q9HC54 /// Q9HC55 /// Q9UQR7	242842_at
MAP6D1	1.3	1.43		242838_at
SFRS4	0.96	1.02		242837_at
LOC728730	1.35	0.7		242835_s_at
FBXL3	1.03	0.44	B2R4A2 /// B7Z2R2 /// P14927 /// Q6FGD1	242829_x_at
FIGN	0.42	0.53	Q17R26	242828_at
	1.02	0.89	B3KRJ9 /// Q59EW7 /// Q69YM5 /// Q8WXA9	242826_at
MGC39584	0.96	1.23		242822_at
	0.89	0.81		242819_at
	0.43	0.99		242818_x_at
TRIM26	0.81	1.34	Q59FN2	242812_at
FSD1L	0.59	0.99		242807_at
	0.94	0.93		242797_x_at
MAML3	0.85	0.84		242794_at
	0.88	0.81		242787_at
	0.95	1.03	B4DFR3 /// B4DI32 /// P02545 /// Q3BDU5 /// Q5I6Y4 /// Q5I6Y5 /// Q5I6Y6 /// Q6UYC3 /// Q8N519	242786_at
PTGR1	0.72	1.12		242775_at
	0.95	0.66	Q8N4W6	242772_x_at
LOC642236	2.49	2.31	Q20WK6	242770_at
LMCD1	0.73	1.34		242767_at
FAM171B	1.1	0.65	B2R8P2 /// Q2M3R2 /// Q9Y5E6	242762_s_at
ZNF420	0.89	0.85		242761_s_at
PIGB	0.82	1.33	B4E1A1 /// Q6ZN11	242760_x_at
	1.77	2.13	A2VCM7 /// A6NGU5 /// B5MC34 /// B5MC36 /// B5MCB2 /// B5MCK8 /// B5MCS5 /// B5MDY1 /// O75693 /// O76033 /// P19440 /// P36268 /// Q14390 /// Q6ISU8 /// Q6NZY2 /// Q9UEN8 /// Q9UEN9	242759_at
C4orf16	1.09	1.12		242753_x_at
	0.37	0.53	Q5VWN6 /// Q6IPC8	242751_at
MMAA	0.82	1.2	Q14563 /// Q75MQ2 /// Q86UJ2	242750_at
ZFHX3	1.27	1.43	A8K6Y6 /// A8MTG3 /// B4DQT7 /// O43670 /// Q59G94 /// Q8N395	242738_s_at
ELF2	0.87	0.9		242735_x_at
	0.77	1.48		242731_x_at
	1.3	1.67		242725_at
LMO7	0.9	0.89		242722_at
	0.74	1.22		242715_at
RANBP2 /// RGPD1 /// RGPD2 /// RGPD3 /// RGPD4 /// RGPD5 /// RGPD6 /// RGPD7 /// RGPD8	0.81	0.69	Q8NBF1	242712_x_at
MED23	0.62	0.93		242706_s_at
	1.13	1.14		242705_x_at
MMAA	1	0.84		242702_at
	1.1	1.08		242699_at
	1.56	1.23		242696_at
	0.96	0.74		242691_at
	0.62	1.01	B4DNI6 /// Q8IW00	242673_at
	1.25	1.01	B4DNI6 /// Q8IW00	242671_at
UFM1	0.83	1.27		242669_at
FMNL2	0.95	1.08	Q5VWC8	242665_at
	0.8	1.44		242664_at
	1.3	1.33		242657_at
GTF2H1	1.02	1.02	Q96FK6	242656_at
	1.7	1.21	B9EK52 /// Q6ZU80 /// Q86TS1 /// Q8N3Z7 /// Q9HCB0 /// Q9NS50 /// Q9ULA4	242655_at
KLHL8	0.98	0.92		242648_at
	1.3	1.03		242646_at
	0.8	0.72	B9EJG0 /// Q8WUJ0	242645_at
NARG2	0.69	0.84		242639_at
	0.62	1.01		242636_at
NAPEPLD	1.28	1.18		242635_s_at
LOC100128510	1.25	1.59	B2ZWH0 /// B4DRM0 /// P17025 /// Q96QH7	242633_x_at
	0.57	0.71		242629_at
HCG18	0.91	1.6		242618_at
TMED8	0.97	1.12		242617_at
	0.71	0.86	B4DXJ8 /// Q5T0T3 /// Q63HJ5 /// Q68CP0 /// Q6ZS14 /// Q96JM2 /// Q9NPX5	242613_at
FAM161B	0.87	0.94	B4E0B1 /// B4E128 /// Q08AF3	242608_x_at
	0.7	0.85	Q8N1A0	242607_at
	0.8	1.12	Q7Z6K3	242606_at
	5.28	1.02		242605_at
ZNF254	1.52	1.44		242602_x_at
GPR137C	1.39	1.34		242592_at
	0.98	0.82	A8K1E0 /// Q9NXS3	242590_at
FSD1L	0.51	0.97	A0PJ51 /// B2RCR8 /// Q13043 /// Q15452 /// Q59FZ4 /// Q5H9T5 /// Q9BS84	242586_at
LOC100131067	1.2	1.01		242585_at
FAM161A	0.69	0.68		242584_at
BMPR1B	1.67	2.66		242579_at
SLC22A3	0.68	1.07		242578_x_at
N4BP2L2	1.65	0.68		242576_x_at
STAM2	1.2	0.88	A8K2M6 /// B3KNG5 /// B3KNI9 /// B3KQG9 /// B3KVS0 /// B7Z634 /// O95864	242569_at
C21orf57	1.94	0.5		242565_x_at
ZNF814	2.04	0.8	Q9C040	242564_at
FANCD2	1.24	1.01		242560_at
TPCN2	2.95	2.7	B0I1R7 /// O95496 /// Q8NEX4 /// Q8TE73	242554_at
EIF3B	0.83	0.99	A1L1A8 /// A8MYP8 /// Q16191 /// Q16192 /// Q16193	242550_at
FLJ39632	0.15	0.31		242546_at
TFDP1	1.19	1.2		242538_at
	1.15	0.81		242523_at
	1.08	1.3		242521_at
C11orf17	0.99	1.03		242515_x_at
MYO9A	1.36	1.6		242512_at
	0.73	1.11		242490_at
CC2D1B	1.04	0.71		242487_at
PRKAR1A	2.18	1.74		242482_at
TTC39B	0.88	0.97	B3KRR1 /// B3KSL5 /// B3KSP8 /// B7Z4Q3 /// B7Z500 /// Q96HJ9 /// Q9Y383	242477_at
	1.36	1.29	A6H8V0 /// B3KNG8 /// Q9H2M9	242476_at
	0.62	0.74		242475_at
VMA21	1.88	1.75		242474_s_at
TRAF4	0.56	0.94		242473_at
FNBP4	1.23	1.08	Q695H4	242472_x_at
EID2B	0.74	1.03	A8KA95 /// Q8IVQ6 /// Q9P0D9	242470_at
ZNF600	0.89	0.83		242463_x_at
RALGPS2	1.49	0.82	B3KV76 /// Q9UC06	242458_at
RGMB	0.51	0.65		242450_at
C3orf70	0.11	0.64	Q6UXH8	242447_at
RG9MTD2	1.33	1.35		242442_x_at
	0.83	1.53	A8K3P5 /// B9ZVP0 /// O14857 /// Q6P3V2	242440_at
ASXL1	1.71	1.43		242439_s_at
ASXL1	1.19	1.38	B4DIW0 /// B4DRN8 /// Q2TB82 /// Q5W0Z9	242438_at
	1.42	1.07	Q16342 /// Q58HM9 /// Q58HN0 /// Q6NW24	242431_at
ZNF567	0.83	0.69		242429_at
G3BP1	1.12	0.63		242422_at
C2orf27A	0.87	1.37	A4D2N8 /// B2R9C3 /// B7Z2V9 /// O43739 /// Q96HS5	242418_at
QPRT	0.9	0.72	Q9NSI2	242414_at
STYX	0.86	1.11	B7Z7V2 /// Q96NL3	242408_at
	1.3	1.15		242403_at
	0.86	0.68		242389_at
	1.11	1.02	A6PVS1 /// Q6UVY6	242371_x_at
	0.83	1.29	A6NID1 /// B1AHD5 /// B1AHD6 /// B1AHD8 /// B1AHD9 /// B1AHE0 /// B1AHE1 /// Q9H2D6	242369_x_at
	1.18	1.29	B3KNC5	242366_at
	1.14	1.21		242363_at
	1.03	0.62		242362_at
	0.71	0.72	B2R960 /// B3KT45 /// O43396 /// Q59G46	242358_at
VTI1A	0.86	0.82		242356_at
NIPBL	1.25	1.14	Q14593 /// Q8WUX5 /// Q96HL5	242352_at
HECTD1	1.25	1.34	A8MWX4	242349_at
	0.97	1.13	A8K7F7 /// B4DNB3 /// B4DWX5 /// Q9Y3I1	242346_x_at
	1.03	1.19	A6NIZ9 /// B3KUR8 /// B4DHW3 /// B4DRH7 /// B5MDN8 /// B5MDP6 /// B5MDR6 /// B7ZMD8 /// O94856	242337_at
GSK3B	1.53	1.27		242336_at
SLC25A37	1.14	1.38	B3KU87 /// B5MCR8 /// B7Z901 /// Q6NXT4 /// Q7Z4D6	242335_at
LOC642236	0.8	1.12		242331_x_at
CCBE1	2.39	1.45		242324_x_at
PLA2G12A	0.65	0.84		242323_at
	0.82	1.07	A0AV68 /// O75438 /// Q3MHU6	242321_at
HIGD1A	0.62	0.81		242317_at
LOC728730	1.7	0.93	B4DGW0 /// O75928 /// Q2TA77	242313_at
	0.88	0.34	Q9NVK5	242312_x_at
	1.33	1.42	B3KPL9 /// B3KSR1 /// B7ZL52 /// Q17R98	242311_x_at
LOC645513	0.84	0.6		242305_at
WIBG	1.22	1.18	B3KVW7 /// B5ME75 /// Q6ZUT9	242304_at
	0.96	1.03	A4QPE5 /// B2RWP5 /// Q658U6 /// Q6PJ64 /// Q8NB95 /// Q96DQ7 /// Q96L73 /// Q96MN8 /// Q9H6B5 /// Q9H6H8	242300_at
RREB1	1.07	1.18	A7E2U4 /// B2RN61 /// Q5VTT2	242297_at
FBXO45	1.01	0.84		242294_at
ING3	1.28	0.87	A8K0X4 /// Q969Y0	242293_at
	0.74	0.77		242289_at
CLIP1	0.89	0.94		242287_at
DNAH14	0.84	1.16		242283_at
	0.8	0.56		242277_at
	0.81	1.03	B4DHE8 /// B4DM51 /// Q96DH6	242273_at
ZNF785	0.93	1	B4DKT8 /// B4DS23 /// B4DSE5 /// B5MC73 /// B5MCH9 /// B5MDS1 /// B5ME48 /// B7Z8K3 /// O15021 /// Q6T2V4	242272_at
TMED5	0.98	0.94		242263_at
	1.51	0.91		242261_at
MATR3	1.06	0.75		242260_at
	2	1.4		242258_at
LOC100130837	0.64	0.59		242255_at
	0.7	1.44		242253_at
SPATA5	1.3	1.42	A8KA95 /// Q8IVQ6 /// Q9P0D9	242251_at
METT5D1	0.6	0.74	Q6NSI8	242247_at
	0.73	1.39	A6YPU5 /// B2R4R2 /// B4DFA5 /// Q8WV07	242246_x_at
	0.39	0.69	B4DVV7 /// Q96GW9	242245_at
TMF1	0.99	1.19		242243_at
	1.05	0.94		242240_at
	0.4	0.91		242239_at
	1.03	1.23		242235_x_at
XAF1	1.43	2.72		242234_at
	0.35	0.69		242233_at
ATXN1	1.75	1.32	A8K9J3 /// Q5TGA6 /// Q8IYI0	242230_at
NAPEPLD	1.37	1.68	P36383 /// Q5H9P2	242229_at
	0.99	1.09		242228_at
	1.01	0.74	B3KMC7 /// B7Z333 /// B7Z4P9 /// B7Z5V3 /// Q56UN9 /// Q59EW3 /// Q7Z5D3 /// Q9NP72	242227_at
	0.86	0.78		242225_at
GPATCH2	1.18	0.98	A6NG10 /// A8K0C9 /// Q5T1C6	242224_at
RPS27A	0.95	0.99		242214_at
ZNF37B	0.82	1.41	Q59G91 /// Q7Z513 /// Q9H4E5	242208_at
LOC100128361	0.74	1.03	A8K1M1 /// B4DXH1 /// B4DXP1 /// P21359 /// Q14931 /// Q59FX3	242207_at
PMS2L5	1.22	0.94		242201_at
NUMBL	1.16	1.11		242195_x_at
NBPF10 /// NBPF11	0.94	0.78		242191_at
MEF2A	2.26	1.46		242176_at
CHD9	1.37	0.98	A1E5M1 /// A8K3G7 /// Q4LE81 /// Q5W154 /// Q6NSC8 /// Q9NP56	242157_at
	0.61	1.06	B2RDB1 /// B3KS56 /// Q96CN9	242153_at
	1.25	0.99		242151_at
C18orf19	0.8	0.86		242149_at
SNRPA1	0.99	1.13	A8K0I0 /// B4DRD4 /// Q13356 /// Q9BZH8	242146_at
	0.98	1.19	B4DL36 /// B6ZDP3 /// Q8N4P2	242143_at
HDAC2	0.91	1.01	B7Z205 /// B7Z280 /// B7Z2B2 /// B7Z2P8 /// Q8NHS3	242141_at
	0.94	0.73		242140_at
	0.85	0.82	P14384	242139_s_at
DLX1	0.34	0.9		242138_at
	1.49	1.27		242137_at
MGC70870	0.92	0.91		242136_x_at
	1.18	1.08	B3KXU8 /// B4DSF8 /// Q14444	242133_s_at
LOC440552	0.7	1.03		242131_at
	0.64	0.5		242126_at
PAQR7	0.76	1.28	B3KRJ9 /// Q59EW7 /// Q69YM5 /// Q8WXA9	242123_at
	1.29	1.05	B4DI94 /// Q68DZ8 /// Q7Z3B1 /// Q8N440	242121_at
	0.98	1.27		242113_at
	1.85	0.96		242107_x_at
CHSY3	0.66	2.02		242100_at
	1.66	0.91		242092_at
KLHL24	1.73	0.62	Q6ZSR3	242088_at
	0.86	0.61		242086_at
	1.59	1.2	A3KMG7 /// A5PKV9 /// A6NCR3 /// B3KTQ7 /// B4DJ09 /// Q9H987	242074_at
	1.09	1.28	B4E1P7 /// Q8WVL4 /// Q9H3U2 /// Q9UII5	242073_at
	1	0.85		242068_at
SAMD8	0.97	0.94		242062_at
PHF11	1.48	0.99		242060_x_at
	1.63	0.88		242057_at
TRIM45	1.17	0.66		242056_at
	0.63	1.2	B3KY61 /// Q05DK9 /// Q9P2N5	242052_at
	1.16	1.09	B9EH00	242051_at
PFDN6	0.92	0.76		242048_at
LOC401022	1.72	1.96		242042_s_at
ASPH	0.39	0.61		242037_at
FBXL17	1.26	0.79	A0AUV6 /// A4D0T4 /// A4D0U8 /// A8MTU2 /// A8MUV4 /// B4DLD9 /// B7ZLK5 /// O15409 /// Q0PRL4 /// Q68DX8 /// Q8N6B5 /// Q8N6B6 /// Q8NFT3	242034_at
KIDINS220	0.88	0.74	A6NEJ5 /// A8K5W3 /// Q53EW6 /// Q5H9Q5 /// Q6FHV7 /// Q96BR1 /// Q96CB5	242032_at
ZNF709	0.84	0.82	A8K341 /// B3KU24 /// B4DQK5 /// B4E1V9 /// B5BU64 /// B5BUJ6 /// Q5TC07 /// Q5TC08 /// Q7Z319 /// Q9BUB5	242028_at
	1.31	0.86		242024_at
	0.51	0.65		242016_at
	1.01	0.94	B4DTD8 /// P51654 /// Q2L880 /// Q2L882 /// Q53H15 /// Q8IYG2	242007_at
LCA5	0.95	0.84		242006_at
	0.72	0.81	B3KNH2 /// Q05CN7 /// Q9UKN8	241996_at
	1.2	0.84	B2RN47 /// B7Z4Y3 /// Q6ZSZ7 /// Q71MG5 /// Q8IYA5 /// Q96MK3	241993_x_at
DRAM	1.19	0.85	B7Z358 /// Q8N5N7	241992_at
BMPER	0.84	1.17		241986_at
JMY	1.17	0.82		241985_at
AKR1A1	0.81	0.84		241978_at
LOC399959	7.59	1.28	B7WP04 /// Q4G0N1 /// Q6RFR4 /// Q6RFR9 /// Q8N7M2	241975_at
	1	0.91		241968_at
MYO5A	0.77	0.76	B7ZM89 /// Q8TAD4 /// Q9BTR6 /// Q9BVY8 /// Q9BY48 /// Q9H9X0	241966_at
ANAPC10 /// ANAPC10P	1.01	1.07		241959_at
LIN7B	0.68	0.83		241957_x_at
	1.45	1.21		241956_at
HECTD1	1.3	1.15		241955_at
FDFT1	1	0.97		241954_at
	1.36	1.33	A8K2S9 /// B2RA61 /// Q8NHU3	241948_at
ZDHHC21	1.03	0.81		241946_at
WDR4	0.55	0.98		241937_s_at
QRSL1	0.87	0.85		241933_at
XG	1.02	0.5	B7Z6H2 /// Q6DN12 /// Q9NPN6	241931_at
	1.95	1.7	B2R8E1 /// O60738 /// Q96S59	241928_at
	0.82	0.85		241925_x_at
CDKL3	0.44	0.89		241911_at
ARL17P1	1.33	1.14		241910_x_at
C1orf58	0.72	0.77		241908_at
	1.1	0.7		241906_at
PIK3C2A	1.09	1.31		241905_at
MKX	0.14	0.14	Q70IA8	241902_at
	0.92	1.02	A8K1Q8 /// B2R553 /// Q53HE6 /// Q9P003	241900_at
	0.91	1.3		241887_at
	0.91	0.78		241879_at
MDM4	0.86	1		241876_at
	1	1.11		241867_at
SLC16A7	0.8	0.82	Q6ZMB2 /// Q96MU8	241866_at
	2.41	2.03		241864_x_at
	0.88	1.25	Q9NSI5	241863_x_at
	1.84	1.16		241845_at
ZNF615	0.77	0.79		241827_at
C2orf60	1.24	0.96	B4DHE8 /// B4DM51 /// Q96DH6	241825_at
	1.49	1.11	Q6NXN2	241824_at
	1.21	1.39		241823_at
	1.52	0.83	A4D1G0 /// Q00534	241815_at
FAM164A	0.61	0.87		241808_at
	0.81	1.29		241804_at
LOC100130623	3.55	2.09	B2RN90 /// B4DSC6 /// Q68DI1 /// Q6ZTH0 /// Q7Z340	241803_s_at
PGAP1	1.09	1.13		241801_at
	1.07	0.59		241799_x_at
	1.11	1.14		241798_at
	1.22	0.99	B4DG30 /// Q7Z3T0 /// Q9UL63	241789_at
	1.08	1.13		241786_at
	0.77	0.89		241780_at
MTX3	1.08	0.97		241779_at
	1.15	1.01	A8K198 /// Q08722	241777_x_at
	0.61	1	B7Z7Z5 /// O95234 /// Q13936 /// Q4G0H8 /// Q59GU3 /// Q5V9X8 /// Q5V9X9 /// Q6YL47 /// Q86XX0 /// Q86XX1	241775_at
	0.71	0.88		241774_at
	1.38	0.91		241773_at
	0.86	1.03		241769_at
FBXO32	0.26	0.75		241763_s_at
DYNC2LI1	1.37	0.63	A8K2S9 /// B2RA61 /// Q8NHU3	241757_x_at
	1.23	1.3	A2A376 /// A2RU81 /// B3KN51 /// B3KWW1 /// B4DWT9 /// O95786 /// Q3B797	241756_at
UQCRC2	0.81	1.29	B3KWT7 /// Q52LR7	241755_at
C9orf126	0.69	0.64	B4DS56 /// B4DY31 /// B5MDN7 /// Q96DN2	241754_at
SLC8A1	0.57	0.58	B2R5M8 /// B4DXS4 /// O75874 /// Q567U4 /// Q6FHQ6 /// Q6FI37 /// Q6FIA4 /// Q7Z3V0	241752_at
OFD1	1.47	1.05	A8K1C8 /// O14886 /// O14887 /// O14888 /// Q14588	241751_at
MURC	0.75	0.98	B4DLQ9 /// B7Z569 /// Q14186	241749_at
CUL7	0.67	0.79	Q01167	241746_at
	1.12	1.1	Q01167	241745_at
OGFOD1	0.54	0.31		241739_at
ZNF250	1.03	1.24		241738_at
SRFBP1	0.87	0.72	A8K3I3 /// B3KMX5 /// B3KSJ7 /// Q96SD1	241734_at
ZNF440	0.83	0.89		241731_x_at
	1.26	1.29	O75346	241730_at
DOK6	1.39	0.99	A8K6H2 /// B4DQP3 /// B4DS57 /// O95138 /// P49321 /// Q53H03 /// Q5T626 /// Q6PJY7	241729_at
DHFRL1	0.98	0.75	B3KUX2 /// B9EG95 /// O95778 /// O95779 /// O95780 /// Q8NCC0	241727_x_at
	0.55	0.78		241724_x_at
	1.4	1.27	P32456	241722_x_at
	1.03	0.97		241721_at
ZNF326	1.13	1.17	A8K6Q0 /// B2R823 /// Q9NRX1	241720_at
DYX1C1	0.69	0.62		241713_s_at
hCG_1645220	1.39	0.88		241710_at
DOCK1	0.97	1.03		241709_s_at
DOCK1	0.58	0.91		241708_at
ZNF320	0.61	0.51		241704_x_at
ARHGAP21	1.23	0.86		241701_at
ZFHX4	2.29	1.64		241700_at
	0.67	1.08		241699_at
RFTN2	0.91	0.49		241698_at
CNTLN	1.13	0.75	Q9NXK6	241696_at
	1.2	0.95		241693_at
	1.23	0.67		241689_at
	0.94	0.67		241687_at
	1.18	1.08		241686_x_at
HECTD1	0.81	1.14		241683_at
	0.79	0.8		241681_at
	1.08	0.98		241680_at
	0.62	1.64	B3KWI5 /// B3KWW8 /// B4DTW9 /// B4E1Z2 /// B4E247 /// B7ZKT8 /// B7ZKU0 /// B7ZKU2 /// Q17RM7 /// Q7Z589	241658_at
	1.24	0.8	P53609	241652_x_at
FLJ10357	1.37	1.57		241627_x_at
	0.9	0.9		241617_x_at
	0.64	0.94		241613_at
LOC730102	0.78	0.88	Q9UKT7	241607_at
ZNF582	0.66	1.15		241602_at
LSM11	0.93	1.2	Q8NCQ8	241599_at
	0.71	1.68	A6NK04 /// A8MQ55 /// B7ZM22 /// Q5JST2 /// Q5JST5 /// Q69YN6 /// Q6TFL3 /// Q7Z3F8 /// Q8NCV3	241560_at
MIB2	0.91	0.69		241541_at
	0.9	1	Q12899	241534_at
HARBI1	0.75	1		241498_at
	0.79	1.57	B7Z7S2 /// B7ZVX8 /// Q6T4R5	241484_x_at
	0.8	2.07	B4DL88 /// Q96JK9 /// Q9NPV6	241473_at
	0.75	0.74		241470_x_at
SETD2	1.11	1.13		241458_at
PTK2	0.91	1.03	B2R8B4 /// B4DV71 /// B4DVI1 /// B7Z5P7 /// O60711 /// Q53FW6 /// Q6FI07	241453_at
	0.87	0.92	Q5VYS8 /// Q5VYS9 /// Q5VYT0 /// Q96KX5	241443_at
	0.7	1.19	A8K0N2 /// B4DPK3 /// Q14914	241435_at
	1.38	1.01		241434_at
RCOR3	2.21	2.64		241433_at
LOC344887	0.73	0.43	B4DEY6 /// B4DG80 /// B7Z6R5 /// Q9NZU5	241418_at
	1.16	1.16		241413_at
C4orf12	1.25	0.8	B2RBK6 /// B4DEK1 /// Q92521	241401_at
	0.86	0.95		241400_at
IPP	0.76	0.81	B2RCV7 /// Q63HQ0	241393_at
	1.42	1.56		241391_at
LARP7	1.01	1.21		241385_at
GK5	1.01	1.28	B3KX40 /// Q495G5 /// Q495G6 /// Q8IVH4	241384_x_at
APLF	0.66	0.97	B4DSU0 /// Q05BD5 /// Q12772 /// Q8NCY3	241379_at
	0.91	0.85	A1Z2K8 /// B2RBY1 /// B4E076 /// B9EGC0 /// B9EKU8 /// P24394 /// Q53EP8 /// Q5FC08	241375_at
ZC3H6	1.36	1.16	B0KYV4 /// B7Z720 /// B7Z8R4 /// Q15723	241372_at
LOC286052	1.2	1.26	B2RAT6 /// B3KTV7 /// B4DT62 /// B4E097 /// P07902	241370_at
RBAK	0.89	0.62		241366_at
	1.24	1.54	B3KWM3 /// B3KWW4 /// B7Z2H1 /// B7Z9V3 /// Q32M41 /// Q32M42 /// Q8NFW9	241365_at
TMEM57	0.83	0.58	B0YIW9 /// Q96KC2	241364_at
CCDC15	0.88	0.56		241360_at
	1.31	1.56	B1AL98 /// B7Z8W3 /// Q5TBK5 /// Q5TBK6 /// Q8WWI1	241359_at
HR	3.04	1.36	B2RMS9 /// B7Z544 /// B7Z545 /// B7Z551 /// B7Z8Q7 /// B7ZKJ8 /// Q14624 /// Q59FS1 /// Q68DH2	241355_at
LOC100129105	1.09	1.43		241353_s_at
ZNF654	0.97	1.15		241348_at
KIAA1618	0.95	1.18		241347_at
	0.84	1.08	B2RTQ9 /// Q8IYD8	241344_at
RNASEH1	0.53	0.6		241343_at
TMEM65	1.39	1.18		241342_at
	1.72	1.21	B3KX40 /// Q495G5 /// Q495G6 /// Q8IVH4	241303_x_at
	1.33	0.86		241268_x_at
	0.86	0.94		241262_at
	1.13	1.01		241223_x_at
C11orf70	1.38	1.06	B2R789 /// B3KRK6 /// B3KT04 /// B3KT75 /// Q6MZG8 /// Q86XT0 /// Q9Y3M8	241198_s_at
AP4E1	1.16	0.41		241174_at
	1.41	0.83		241114_s_at
	0.63	0.8		241091_at
	0.86	0.94		241036_at
TBC1D8	1.36	0.89		241017_at
LOC339400	1.22	1.12	B3KY78 /// Q49A95 /// Q53XA3 /// Q68DU9 /// Q6N018 /// Q7Z330 /// Q9P2G9	241014_at
CARS	0.81	0.89		240983_s_at
	0.75	0.64	Q2NL68	240971_x_at
	1.33	1.24	A8K119 /// A8K6L7 /// B4DR10 /// B8PTI0 /// Q45XF9 /// Q7Z5R8 /// Q86UC6 /// Q96QB1 /// Q9H7A2	240929_at
FCF1	1.2	0.94		240928_at
	2.03	1.91	B3KPY4 /// Q6NSZ9	240908_at
DAB2	0.84	0.87		240873_x_at
LOC100129406	1.04	1.02		240868_at
	0.96	1.01		240800_x_at
	0.76	0.8		240798_at
TTN	0.52	0.93		240793_at
	0.73	0.91	A8K5H1 /// B4E0L9 /// O75437 /// Q7Z2R1	240781_x_at
TMEM171	0.65	1.08	B4DNZ8 /// Q8NFC6	240770_at
	1.64	1.43		240765_at
	1.96	1.58	A8MZ09 /// B7Z3W5 /// B7Z5S6 /// B7Z5W3 /// Q5T879 /// Q8N450 /// Q9BXM9	240727_s_at
	0.94	0.85	B4DJV7 /// B5MCG7 /// Q3B820	240721_at
TBX5	0.29	1.14	A8KAE3 /// B2R953 /// B4DSV1 /// O00238	240715_at
	0.77	1.46	Q3SWV3 /// Q6ZW97 /// Q8NAE5	240673_at
LOC100131110	0.6	1	P58557 /// Q8TBC8	240616_at
LCORL	0.87	0.77	B1ASV5 /// Q96P70	240592_at
	1.14	0.98	Q9BXW9	240574_at
LOC374443	0.86	1.5	Q6PH81	240572_s_at
MBNL3	0.85	0.83	B4DV79 /// B4DXN6 /// P55884 /// Q59FS8 /// Q96G38	240561_at
	2.01	1.52	Q86SX0	240557_at
	0.97	0.76	B1AP70 /// Q6ZUZ3 /// Q8NHH0 /// Q8NHH1	240549_at
GREM2	1.93	1.09		240509_s_at
	2.64	2.16	B3KXI4	240499_at
HELZ	0.58	0.62	Q68DE3	240486_at
	0.6	1.1		240472_at
	1.06	1.14		240467_at
YTHDC1	1.59	1.2		240459_at
	0.89	0.81		240454_at
GSPT1	0.91	0.95	A8K0I5 /// Q8N6N2	240452_at
	1.78	1.71	B2R5T5 /// P10644 /// Q68DQ4 /// Q96P62	240451_at
	1.14	1.52		240450_at
ZNF341	0.94	0.95	A5PLN1 /// B4DQ10 /// B4DQX4 /// B4DVQ6 /// B4DW93 /// Q5VTQ0 /// Q8IXZ6	240449_at
LOC650794	0.55	0.97		240436_at
	1.07	1.19	A6NKV7 /// Q3ZAQ7	240432_x_at
ZNF546	0.75	0.8	B4DUU9 /// Q2KJU3 /// Q2KJU4 /// Q2KJU5 /// Q2KJU6 /// Q9BUZ4	240429_at
	1.44	1.55	B3KNP0 /// Q8N3X1	240421_x_at
LOC100126784	1.19	1.04		240407_at
KIRREL3	0.36	0.91		240402_at
	0.62	0.84	Q13580 /// Q6ZNG1	240399_at
	1.1	0.68		240397_x_at
LOC100128727	2.03	2.38		240395_at
NDUFB2	1.27	1.45	B1AMV0 /// B1AMV1 /// B7Z7B1 /// Q86X27 /// Q8N7G9	240391_at
UBE2D3	1.1	1.21	B0ZBD0 /// P39019 /// Q6N074 /// Q8WVX7	240383_at
LOC100131914	1	1.16	Q6NW40	240382_at
ANK1	1.7	1.94		240363_at
LYRM7	0.87	0.73	A6NLC5 /// B9EH83	240344_x_at
TRIM61	0.82	1.35	B7Z493 /// B7Z8F9 /// Q49A55 /// Q96M96	240342_at
	0.75	1.2	Q8TBZ6	240314_at
TOR1AIP1	1.13	0.76		240310_at
TK2	0.65	1.07	A6NIZ6 /// B3KVI8 /// Q498B9 /// Q5JWS8 /// Q6P1M8 /// Q76L82 /// Q8IXJ9	240300_at
	0.68	0.89		240277_at
FLRT2	0.69	0.77		240259_at
	1.08	1.29	B7Z8K4 /// Q13283 /// Q32P45 /// Q53HH4 /// Q5HYE9 /// Q5U0Q1 /// Q6FI03 /// Q6ZP53	240245_at
ZNF566	0.88	0.55	A8K7I8 /// Q580R0	240239_at
	0.86	1.19		240237_at
	0.42	1.13	B4DDH4 /// Q15274	240231_at
CSNK1A1	0.71	0.92	B9EJG0 /// Q8WUJ0	240221_at
	1	0.88		240217_s_at
	1.03	0.88		240214_at
	0.71	0.68		240205_x_at
PPP1R3C	1.11	1.54		240187_at
ERGIC2	1.04	0.83		240172_at
LOC152742	0.47	0.78		240167_at
ZNF273 /// ZNF493 /// ZNF738	1.09	0.84		240155_x_at
	1.65	1.49		240149_at
	1.66	0.85	Q9H903	240139_at
	0.69	0.91		240131_at
	0.85	1.07		240121_x_at
TMEM174	1.34	1.58		240114_s_at
RHOBTB3	1.52	2.02		240111_at
	1.05	1.1	B4E137 /// Q96AJ9	240108_at
GNPTAB	0.46	0.67	A2RRA7 /// A6QL62 /// A8K2T2 /// Q6IEH8 /// Q6KC79	240106_at
	1.02	0.92	B3KWT6 /// Q2KQ74 /// Q5XJ19 /// Q9BRJ0 /// Q9ULT8	240095_at
PDE5A	0.34	0.87		240088_at
TNRC6B	0.9	1.09	B2RBM6 /// Q16458 /// Q71JB2 /// Q9NYZ2 /// Q9P1J9	240044_x_at
FIBCD1	0.38	1.13		240042_at
	0.88	0.86		240038_at
LIN7A	0.95	0.79	Q6UXH8	240027_at
	1.17	1.37		240008_at
	0.39	0.67	B2R4G1 /// Q9Y241	239995_at
	1.21	1.34		239978_at
	0.83	1.1	Q9HCJ0 /// Q9NXW7	239973_at
LYRM7	0.84	0.66		239960_x_at
	0.55	0.62		239951_at
	0.65	0.66		239942_at
ZNF207	1.07	0.82	Q96DC3 /// Q9BRP8	239937_at
LOC255480	0.52	1.19		239919_at
ADAMTSL1	1.39	1.93	Q92766	239909_at
	1.29	1.28	A6NF90 /// P0C2W1	239903_at
	1.5	2.52	B4DEL2 /// B7ZKQ7 /// Q5GRH6 /// Q9NXR8	239900_x_at
BCLAF1	0.78	0.69	B2RBD9 /// B4DH49 /// B4DHF7 /// B4E0Z9 /// B4E302 /// B4E3H6 /// B4E3L7 /// B7Z3G3 /// O75410 /// Q5HYH0 /// Q8IUJ5	239897_at
	1.07	1.02		239896_at
RAB12	0.76	0.61	B2RMY3 /// Q8N5L1 /// Q9BXX0	239891_x_at
	0.74	0.81	A0AVD3 /// B3KXA5 /// O43666 /// O43667 /// P30622 /// Q17RS4 /// Q29RG0 /// Q59GJ4 /// Q6P5Z9 /// Q6Q318 /// Q86WU4	239888_at
	0.99	1.39	Q8IX07	239866_at
	0.93	1.28	B7ZLQ7 /// B7ZLQ8 /// Q17RY0	239863_at
	1.29	1.01		239859_x_at
	0.43	0.73		239847_at
	1.52	1.07	A8K8V0 /// B4DQL1	239845_at
RIT1	0.83	0.81		239843_at
	1.51	1.43	B2RA86 /// B4DDE7 /// B4DIB6 /// B4DM66 /// B4DMB0 /// B4DS31 /// B4DSZ2 /// B4DT00 /// B4DZ01 /// B7ZAN9 /// O95319	239842_x_at
	1.84	2.02	A8K1N6 /// B2R5V7 /// B4DEG9 /// B4DMS9 /// B4DN43 /// B4DSD6 /// Q9H0E9	239841_at
ZNF555	0.87	0.84		239839_at
TMEM106C	1.25	1.03		239831_at
TMEM107	0.98	0.94		239824_s_at
	0.69	1.29	B3KSW5	239811_at
	0.58	0.79		239809_at
RNF40	1.49	2.12		239801_at
TIRAP	1.17	0.93	B3KVX5 /// B4DDB3 /// B4DQ16 /// Q93100	239796_x_at
	0.94	1.07	A6NJ78 /// B5MC64 /// B7WNU2	239794_at
LOC440288	0.97	0.69		239792_at
LOC100130740	1.67	1.85		239791_at
DZIP1L	0.94	1.01		239785_at
	1	0.68		239780_at
LOC100131512	0.88	0.55		239775_at
CAND1	1.4	1.39	B3KPW1 /// Q6GPH4	239771_at
CDH11	0.68	0.6		239769_at
	1.04	0.85		239768_x_at
GCNT1	0.78	0.77	B4E3B0 /// Q4G0T7 /// Q6IQ20	239761_at
LOC441383	0.73	1.36		239753_at
OCIAD1	0.84	0.84	A8K5C3 /// Q6PIX0 /// Q9NW75	239748_x_at
TULP4	1.08	1.04	B2RP63 /// B2ZZ89 /// B4DIF8 /// Q01082 /// Q53RC4 /// Q8WYB3	239742_at
LOC283658	0.79	0.88	A8K6J6 /// B4E2Y1 /// B4E3V3 /// B6ZGS1 /// B7Z3W1 /// Q03181 /// Q5D1P0	239741_at
	0.94	0.6	B2R4M4 /// B4DVW5 /// O15492	239735_at
PGAP1	0.94	1.08		239725_at
CD109	0.95	0.41		239719_at
	0.98	0.72		239718_at
FIGN	0.41	0.56	Q15157 /// Q16673 /// Q7Z7L0	239710_at
	0.68	0.76	B2RBV7 /// B4DKT2 /// Q13619	239706_x_at
PMS2L1	1.58	1.65	A8K9F1 /// B4DG53 /// B7Z3A0 /// B7Z7R4 /// Q3BBV0 /// Q3BBV1 /// Q3BBV2 /// Q3BBV3 /// Q3BBV4 /// Q3BBV5 /// Q3BBV6 /// Q3BBV7 /// Q3BBV8 /// Q3BBW0 /// Q3BBW3 /// Q5TI25 /// Q5U227 /// Q6P3W6 /// Q86T75 /// Q8IX62 /// Q8IX70 /// Q8IX72 /// Q8IX75 /// Q8IX81 /// Q8IX82 /// Q8IX85	239699_s_at
C3orf67	1.06	0.98		239697_x_at
TRIM7	0.69	3.17		239694_at
BTBD12	0.6	1.25	A8K720 /// B4DFQ7 /// Q02078 /// Q59GX4 /// Q7Z6C9	239687_at
	0.91	0.63	B2RC57 /// B3KUX4 /// B7Z4B3 /// B7Z4T5 /// O00470	239682_at
	1.16	0.71	Q05D20 /// Q6P0P7 /// Q6PJV4 /// Q7Z5U1 /// Q9Y2W1	239680_at
	1.06	1.48		239678_at
	0.84	1.21		239672_at
CHD9	0.91	0.93		239654_at
ANAPC5	0.9	1.08		239651_at
DCUN1D3	0.84	1.03	B3KNS4	239648_at
	0.87	0.71	B8ZZW6 /// P56177 /// Q53SU3 /// Q7Z724	239638_at
	0.78	1.13		239633_at
CFLAR	1.01	0.71	Q8NAS8	239629_at
	1	1.4		239624_at
	0.61	0.77	A0S0T0 /// A0S0Z5 /// A0S1G1 /// A0S208 /// A0S2B3 /// A0S2H8 /// A0S2R9 /// A0S2V8 /// A0S3K5 /// A0S3X2 /// A0S437 /// A0S525 /// A0S590 /// A0S8D6 /// A0S9D7 /// A0SB36 /// A0SBS0 /// A0SBU5 /// A0SBX2 /// A0SCX3 /// A1DT13 /// A1DTA5 /// A1DTI3 /// A1DV59 /// A1DV99 /// A1DVF0 /// A1DVF1 /// A1E1E3 /// A1E1T6 /// A1Z496 /// A1Z4E8 /// A1Z4G1 /// A1Z4L3 /// A1Z519 /// A3FPA1 /// A3R095 /// A3R…	239614_x_at
LOC100240734	1.6	1.03	B7Z392 /// O75182 /// Q2NL91	239612_at
	0.95	0.92		239603_x_at
LPCAT2	0.5	0.64		239598_s_at
SLC30A7	1.11	1.42	A1L182 /// A2A2D3 /// Q5XKF9 /// Q86WK9	239596_at
	2.22	1.6		239587_at
PML	0.99	0.7		239582_at
GJA3	0.44	0.36	B4DQA6 /// B4E2A9 /// Q4VX76	239572_at
	0.83	0.94		239571_at
NEGR1	0.97	0.9	A2V663 /// Q1JTV1 /// Q3MTV6 /// Q70JA7	239548_at
	1.21	0.9		239545_at
ZRANB3	0.51	0.81	B7Z5S2 /// Q7Z2F6	239538_at
	2.44	1.22		239536_at
	2.93	1.9		239532_at
CTTNBP2NL	1.33	1.02	A6PW79 /// Q14CV6 /// Q8N884	239525_at
	1.06	0.78		239519_at
	1.81	2.41		239516_at
SFRS4	0.94	1.15		239512_at
	0.58	0.43	A6NMR8 /// B3KRL0 /// Q58EX2	239503_at
FAM98A	1.34	1.53	Q5T2K3 /// Q9H8W5	239487_at
ZNF708	1.25	1.08		239482_x_at
FAM133A	0.93	0.89		239481_at
	0.33	0.44	Q5SVY4 /// Q8IZC4	239478_x_at
	1.37	1.02	Q6QA70 /// Q8IVF6 /// Q8NA88	239476_at
	0.61	1.3		239474_at
MKX	0.15	0.18	Q9UF56	239468_at
LOC344595	0.67	0.92	Q86T96	239466_at
ZNF284	1.31	1.27	B4DG84 /// B4DGY1 /// B4DI12 /// B4DK94 /// Q7Z322 /// Q9ULH0	239462_at
GALNTL2	1.23	1.32	B4DV74 /// Q9BWU0	239461_at
	0.9	1.26	A8K4E6 /// Q8N972	239450_at
PCDHB6	1.5	5.92		239443_at
AFF4	0.73	1.31		239439_at
	0.61	0.85	Q32M63 /// Q6ZMG9	239437_at
SHROOM1	0.38	0.64		239435_x_at
LRRC8E	0.77	1.02	Q5TBC7 /// Q68DJ4	239433_at
FLJ31306	1.55	0.86		239432_at
TICAM2	1.19	0.95	A7X9N5 /// B4DRL2 /// Q86VQ0	239431_at
	0.77	0.76		239423_at
MAP9	0.5	0.59	P47989 /// Q585T6	239415_at
CEP152	1.18	0.97		239413_at
	0.95	0.95	Q8N8U9	239410_at
	0.65	1.03	B2RN47 /// B7Z4Y3 /// Q6ZSZ7 /// Q71MG5 /// Q8IYA5 /// Q96MK3	239393_at
POGK	0.95	0.9		239392_s_at
FAM120AOS	0.57	0.46	A8KAL8 /// P14550 /// Q6IAZ4	239391_at
LRRFIP1	1.17	1.02		239379_at
EIF1AD	0.58	1	B4DLB3 /// Q05DG6 /// Q14865 /// Q32Q59 /// Q6NZ42	239377_at
	0.91	1.11		239376_at
	1.19	2.19	A8CDT9 /// A8MZC5 /// B4E147 /// B5LY56 /// O95317 /// O95318 /// Q59FF5 /// Q9UES3 /// Q9UES4 /// Q9UES5 /// Q9Y4I1	239375_at
	1.25	1.18	Q4W5I2 /// Q9UM13	239372_at
	3.93	2.41	A8MYA1 /// Q9HAP6	239370_at
BDNF	0.49	0.83	B3KWT6 /// Q2KQ74 /// Q5XJ19 /// Q9BRJ0 /// Q9ULT8	239367_at
	0.81	0.75	B3KQ95 /// B4DJE5 /// B4DND3 /// B4DT56 /// B4DTK0 /// B4DWP0 /// B7Z1J3 /// B7Z9R8 /// P37268 /// Q6IAX1	239363_at
	0.72	0.63	Q3LI58 /// Q3ZCR5 /// Q6ZRU8 /// Q8N7F4	239358_at
	0.86	0.99		239355_at
	0.8	0.89		239346_at
LOC728705	1.05	0.88		239343_at
	0.74	1.16	B4DHR6 /// Q8WY44 /// Q96PU8	239340_at
	0.71	1.16	P57081	239339_at
THBS1	0.26	0.61		239336_at
	1.08	0.85	B2RBJ8 /// Q9H0R6	239333_x_at
	0.82	1.23	B4E289 /// P55808 /// Q496N8 /// Q496P0 /// Q496P1	239331_at
	0.96	1.02		239329_at
METTL12	1.48	1.74		239316_at
	1.16	1.6		239311_at
	2.34	2.76	A8K963 /// P61968	239302_s_at
	1.02	1.37	Q5W0T9 /// Q8NA23 /// Q8NC90	239300_at
C8orf79	0.22	0.54		239297_at
MTMR15	1.35	1.22	B4DGS2 /// B4DMR2 /// B4DX41 /// B7Z2C5 /// Q8IVW4	239289_x_at
TNIK	0.64	0.76	Q8IVW1	239288_at
CDH11	0.82	1.2	B7Z1V1 /// B7Z953 /// B7Z9G5 /// Q5VW32	239286_at
TMED5	0.82	0.78		239283_at
LOC730102	1.53	2.01	B4DG55 /// B4DRX6 /// B4E2G4 /// O00443	239279_at
	0.63	0.71	B3KWM5 /// Q8IYA7	239278_at
	0.8	1		239277_at
TMEM20	1.21	1.1		239265_at
	0.73	1.11	O15151 /// Q2M2Y2 /// Q32SL2 /// Q59FS6 /// Q5T0Y2 /// Q5T0Y3 /// Q5T0Y4	239258_at
	1.74	1.23	B2R747 /// Q16566	239253_at
	0.91	0.81		239252_at
	1.51	1.48	B4DWX9 /// O60669 /// Q8NEM3	239251_at
ZNF542	0.75	0.72		239250_at
FARP1	0.9	0.86		239246_at
ZNF638	1.28	0.98		239243_at
	0.94	0.75		239236_at
CCDC88A	0.77	0.9		239233_at
	0.99	0.84		239231_at
	6.62	1.68		239229_at
FBXL20	1.61	1.16	B4DGU8 /// B5MDY8 /// Q8IW35	239223_s_at
PDE1C	0.42	0.37		239218_at
ABCC3	0.67	0.86		239217_x_at
LTV1	0.42	0.42	B2RNA2 /// B3KTW4 /// B4DT23 /// B4DY25 /// Q05CT2 /// Q8NCA5 /// Q9Y3Y6	239212_at
C21orf57	2.76	0.91	A8K6R9 /// B4DH87 /// B7ZKW9 /// Q8N8J6	239208_s_at
KDM5C	0.68	0.65	B3KNJ0 /// Q8NE65	239207_at
	0.64	0.71	A2RUC4 /// A8KAJ9 /// B2RNE3	239202_at
PFTK2	0.61	1.2		239201_at
IRGQ	1.1	0.95	Q6P0N0	239177_at
	1.14	0.74	A8K381 /// B4DRE6 /// B4DT67 /// Q9NUQ6	239164_at
	0.94	0.83		239154_at
RP11-144G6.7	1.22	0.69	A6NI33 /// B4DYY6 /// B8ZZY1 /// Q75T13	239151_at
ARSK	0.73	0.83		239147_at
RNF138	0.73	0.96		239143_x_at
RFESD	0.83	0.86		239142_at
	0.74	0.76		239140_at
	0.97	0.75		239138_at
CPPED1	0.62	1.08		239135_at
	0.82	1.17		239134_at
	1.86	1.13		239133_at
	1.52	1.48	B4DSD4 /// Q5T8U9 /// Q5T8V1 /// Q8N4J0	239129_at
CA5BP	0.68	0.84		239106_at
	0.55	0.87		239102_s_at
ITCH	1.05	0.91		239101_at
PCNX	1.24	0.9		239100_x_at
NPL2	0.89	1.17	A4KYM0 /// Q0VAQ6 /// Q498Y9 /// Q969P5	239093_at
	0.62	0.82		239091_at
JDP2	1.12	0.61	B3KSN4 /// P22695	239085_at
SNAP29	0.9	0.98	Q3SXZ0 /// Q3SXZ1 /// Q3SXZ2 /// Q8N9R8	239084_at
ZNF786	1.1	1.42	P32418 /// Q14913 /// Q4QQG6 /// Q4QQH3 /// Q587I6 /// Q59GN4 /// Q6LAJ8 /// Q6LAJ9 /// Q7Z686 /// Q9UD55	239083_at
	0.83	0.97	A6NF31 /// A8K0W2 /// A8K2T9 /// B4DLQ3 /// B9ZVU5 /// O75665 /// Q4G0Q0 /// Q4VAK3 /// Q6P668 /// Q7Z7F6	239081_at
	1.05	0.91	Q5BKX8	239080_at
	0.84	1.13		239069_s_at
GNL1	1.15	0.59	B4E360 /// Q8N543	239068_at
	10.88	2.89	B3KNS9 /// P15622 /// Q3B7J8 /// Q59HE9	239066_at
	1.94	1.2		239058_at
CIAO1	0.9	0.88	Q8IYD9	239053_at
	0.92	0.95	Q05DD3 /// Q8IYI8	239050_s_at
FAM122C	0.76	0.93	Q6PKX4	239047_at
	1.09	0.88	B3KV46 /// Q86XF0	239046_at
ITFG1	0.8	0.93		239044_at
ZNF404	0.93	0.86		239043_at
TSR1	0.77	0.98		239042_at
C1orf52	0.82	0.89		239038_at
MTHFR	1.01	1.25	A8MYX1 /// B4DLN0 /// B4E179 /// Q5BKZ1	239035_at
CXorf24	0.87	0.85		239034_at
	0.51	0.92	Q9BZG2	239033_at
LYPD6	0.72	1.22		239028_at
ZNF148	0.96	1.21	A8MU08 /// B2RUU3 /// Q14185	239024_at
	1.24	1.13	A8MU08 /// B2RUU3 /// Q14185	239022_at
KLF12	1.53	1.68	Q86VY2 /// Q86YQ8 /// Q8N7E6	239019_at
ZNF616	1.01	0.94		239007_at
ALDOA	0.68	0.93	Q5U3C1 /// Q6DK57 /// Q6ZMW8 /// Q6ZN29 /// Q86UP3 /// Q86WW5 /// Q9H7F3	238996_x_at
POLI	1.3	0.94	Q14DH4 /// Q52LD8	238992_at
TRIM61	0.71	1.19	B1AMC8 /// Q9NXG0	238990_x_at
C1GALT1C1	1.32	1.04		238989_at
B4GALT1	1.26	0.91		238987_at
DENR	0.6	0.66		238982_at
C2orf69	1.14	0.96		238974_at
LOC440731	0.87	1.05	B3KWT6 /// Q2KQ74 /// Q5XJ19 /// Q9BRJ0 /// Q9ULT8	238973_s_at
	0.72	1.46		238970_at
C3orf55	0.86	0.88		238969_at
	1.35	0.81	A0JLT6 /// B4DTS2 /// B4E125 /// Q8N2H2 /// Q8NCK8 /// Q9BZL6	238963_at
	1.67	1.6		238953_at
ZNF829	0.82	0.43		238952_x_at
	0.49	0.55		238951_at
RNF145	1.02	1.04		238949_at
TM9SF1	0.87	1.23		238948_at
	1.28	1.23	A8K489 /// Q15007 /// Q5TCL9 /// Q6AHX7	238944_at
KLF12	0.6	0.56		238940_at
ZNF420	1.05	0.62		238937_at
RPS27L	0.96	0.91		238935_at
	2.67	1.59	B3KWQ1 /// B4DZ90 /// Q8WWH5	238932_at
METT10D	1.42	1.2	A8MZ99 /// B4DQZ9 /// B7Z9R3 /// Q96NG8	238931_at
SFRS2B	0.76	0.94	P83369	238929_at
SPOP	0.94	1.02		238923_at
	0.2	1.2		238919_at
DENND5B	0.75	1.12	Q8NB90	238917_s_at
	0.93	1.01		238913_at
C9orf85	0.89	1.1		238912_x_at
S100A10	1.31	0.66		238909_at
CALU	1.39	0.85	Q96MB7	238908_at
ZNF780A	0.59	0.78	B3KMY3 /// Q9UK58	238907_at
UBXN2B	1.32	0.92		238903_at
PCMTD1	1.26	1.82		238902_at
	1.1	0.93		238896_at
	1.1	1.25		238895_at
LOC338758	1.13	1.12		238893_at
	1.12	0.64		238891_at
PSMG1	0.81	1.17		238890_at
AGBL5	0.7	0.91	Q9BYW2	238889_at
	2.11	1.63		238883_at
GTF3A	1.2	1.22	A8MYY5 /// B4DH13 /// B4DWJ1 /// B4E2N6 /// Q05397 /// Q59GM6 /// Q59GN8 /// Q658W2 /// Q8IYN9 /// Q8N9D7	238880_at
	1.02	1.03		238879_at
UACA	0.47	0.55		238868_at
TMEM182	0.71	1.36	B3KYA2 /// B4DV59 /// B4DYY7 /// Q9P2K3	238867_at
	1.07	0.88		238863_x_at
C6orf130	1.44	0.96		238860_at
FAM149B1	0.74	0.98	B3KX85 /// Q8N1N5	238859_at
PANK2	0.8	0.95		238856_s_at
	1	0.96	Q6X854	238852_at
ANKRD13A	1.09	1.01		238851_at
OTUD4	1.37	1.45	B3KVV4 /// Q8N3H0	238848_at
TNFRSF11A	0.74	0.88	A2A6V4 /// Q8N5C3 /// Q9Y573	238846_at
NPHP1	0.87	0.77		238844_s_at
NPHP1	1.07	0.67		238843_at
	0.92	0.81		238842_at
	0.94	1.09	Q4G0J3 /// Q96IZ8	238829_at
KIAA1919	0.45	0.81	Q6ZS86	238828_at
	0.57	0.37	A1IGU5 /// B4DTT4 /// B4DUA3	238826_x_at
ACRC	1.23	1.37	A8K476 /// Q8IW19	238825_at
	1.75	1.31		238824_at
FMNL3	1.47	1.96	Q9NV64	238823_at
	0.71	0.72	A9JR71 /// P61129 /// Q6ZN12 /// Q6ZW96	238822_at
CSTF2	0.87	0.74		238821_at
ZNF347	1.22	0.94	Q8NA77	238819_at
KIAA1429	0.94	1.05	A6NC62 /// B9EGS1 /// Q9NYW8	238818_at
ATP11B	1.4	1.17		238811_at
C11orf52	2.39	1.94	Q0P6D6	238805_at
HECTD2	2.53	2.21		238803_at
ZCCHC6	0.81	0.77	A6NCE3 /// O43593	238800_s_at
C10orf18	0.79	0.49		238795_at
C10orf78	0.98	1.05	Q8IZM8	238794_at
TIGD7	1.04	1.39	Q9H932 /// Q9HCF4	238793_at
PCNX	0.61	0.57	O95218 /// Q68CX7 /// Q68DP0	238792_at
LOC374443	1.14	1.89		238790_at
	0.66	0.81	Q6PI78	238787_at
	1.89	1.76		238785_at
	0.68	1.18		238782_at
	1.05	1.47		238781_at
	0.93	0.9		238775_at
	1.28	1.73		238774_at
METT5D1	0.91	0.97		238773_at
C2orf68	0.96	1.05		238768_at
	0.73	1.34		238767_at
ATP6V1G1	0.96	0.97		238765_at
MTHFD2L	0.99	0.92		238762_at
	0.56	0.44	Q7Z2V0 /// Q9BRQ4	238761_at
GAS2L3	0.63	0.48		238756_at
FREQ	0.83	0.81		238753_at
	0.95	1.07	B4DGT1 /// B4DTV8 /// Q13813 /// Q14917 /// Q9UG16	238739_at
REV3L	1.6	0.95		238736_at
	0.72	0.61		238733_at
SETDB2	1.25	1.49		238731_at
	0.69	0.99		238729_x_at
	1.02	1.19		238728_at
BPGM	1.09	0.83	B4DSR6 /// Q14204 /// Q6P2H7 /// Q92862 /// Q9NRC3	238724_at
ATXN3	1.06	1.32	Q8IXN7	238723_at
NAPEPLD	1.16	1.02		238722_x_at
	0.97	0.94	Q53GF0 /// Q8NFW8	238719_at
FAM85A	1.38	1.27		238716_at
	0.88	1.12		238714_at
ZNF148	1.16	0.83		238711_s_at
	0.66	0.72		238709_at
	1.06	1.08		238704_at
C11orf92	0.88	0.85		238701_x_at
	1.08	0.91		238700_at
HNRNPA1L2	0.71	0.62	A8K067 /// A8MVQ3 /// B4DI19 /// B4DKY1 /// B4DPV7 /// P49589 /// Q53HG6 /// Q59HE5 /// Q5HYE4	238696_at
PHC3	0.7	0.93		238693_at
TPM1	0.8	1.07		238688_at
FBXO3	0.77	0.81		238686_at
	0.73	0.55	A6NJK0 /// B3KS10 /// B7Z6F9 /// Q5JTP9 /// Q99549	238684_at
WDR36	1.6	1.07	B3KP65 /// B4DEQ7 /// B4DU23 /// B4E0T7 /// Q96II8	238677_at
BTF3L4	0.96	0.98		238675_x_at
	1.33	0.96		238672_at
PTGS1	0.36	0.37	Q8TAS9 /// Q9BRJ6	238669_at
	1.46	1.26		238666_at
ATPBD4	0.95	0.94	A8K523 /// B4DTT5 /// B4DTZ8 /// Q12841 /// Q9BZQ0	238662_at
WDFY3	0.82	1.01		238660_at
	1.07	0.96	Q8N4L4 /// Q8N839	238656_at
LRIG2	1.34	0.96		238653_at
	1.22	0.92		238652_at
WDR89	1.21	1.86	B2RAW0 /// B4DNN1 /// P98082	238650_x_at
C14orf28	0.88	1		238647_at
ANKRD13D	1.8	1.62		238642_at
C5orf28	1.47	1.71	Q9H0N5	238635_at
	0.43	0.91		238634_x_at
EPC1	1	1.65	Q96BN8	238633_at
TRAPPC2L	1.17	1.12		238628_s_at
	1.13	1.13		238624_at
	1.37	2.38	B4DEN1 /// B4DLP4 /// P61313 /// Q5U0C0 /// Q642I1	238623_at
RAP2B	0.75	1.12		238622_at
	0.62	1.39		238617_at
ERLIN2	1.55	1.31	Q8WVE6	238615_at
ZNF430	1.06	1.14		238614_x_at
ZAK	0.79	0.91		238613_at
	1.17	0.69	A2RU21 /// B7Z2P0 /// B7Z4E5 /// B7Z4J0 /// B7Z5R7 /// B7Z7C4 /// B7Z7Q8 /// B7ZLX3 /// Q68D09 /// Q6TAR3 /// Q7Z460	238612_at
C7orf38	0.96	0.91		238609_at
ZNF747	0.96	0.81		238606_at
	0.9	0.95		238604_at
DIS3L2	1.47	1.22		238602_at
PHKB	0.75	0.86	B3KMY5 /// O15061 /// Q5W5X9	238601_at
IRAK1BP1	1.53	1.2	A6ND77 /// A8K3J6 /// B4DTK5 /// Q96TB0 /// Q99593	238599_at
ANKRD13C	1.04	1.23	A8K6W3 /// P11511 /// Q05CU4 /// Q16449 /// Q45RG7 /// Q7Z471 /// Q8IYG4 /// Q8IYJ7 /// Q8TCA4	238597_at
TMEM107	0.95	0.74		238590_x_at
	1.62	1.53	B4XZE3	238589_s_at
UBASH3B	0.24	0.74		238587_at
GTDC1	0.98	0.97		238585_at
MSRB3	0.66	0.83		238583_at
GBP5	0.85	1.63	A2A499 /// Q18PE1 /// Q8N1M3	238581_at
TSHZ2	4.16	5.07		238577_s_at
	3.33	2.31		238576_at
MCART1	0.81	0.62		238574_at
	0.37	0.36	A8K979 /// A8MVB3 /// B4E2M9	238571_at
GABBR1	0.7	0.89		238569_at
	0.89	1.05		238565_at
UTP23	1.07	1.18		238562_at
	0.78	0.51		238558_at
AGAP10 /// AGAP4 /// AGAP9 /// BMS1P5 /// RP11-144G6.7	1.04	0.49	P07585 /// Q6FH10	238553_at
FUT11	0.62	0.85		238551_at
RUFY2	0.83	0.7		238550_at
CBFA2T2	0.93	1.15		238549_at
	0.8	0.46		238548_at
HEXIM2	1.27	1.45		238547_at
SLC8A1	0.64	0.57		238546_at
ULBP2	0.71	1.06		238542_at
ANKRD11	0.81	1.05	Q9H772	238538_at
	0.83	1.45		238536_at
NNT	0.65	0.71	B7ZLW2 /// P42694 /// Q6DFV5 /// Q6PGP6	238530_at
UBR1	0.9	0.95		238528_at
KLHL36	0.76	1.04		238523_at
TRERF1	1.11	1.1		238520_at
RSC1A1	1.14	1.17		238519_at
BMPR2	0.74	0.68		238516_at
	0.88	0.88		238515_at
ZNF720	1.27	1.34	Q96MU7	238510_at
	1.12	0.82	B3KVT8 /// Q3KP44	238507_at
LRRC58	0.87	0.84		238506_at
ADPRH	1.1	1.17	A8K2W7 /// B2RCT6 /// P15170 /// Q7KZX8 /// Q96GF2	238505_at
C6orf57	1.35	1.38		238504_at
	1.24	1.5		238501_at
TMEM136	0.76	0.81	B3KU97 /// B7ZM09 /// Q504V9 /// Q9BYN7	238497_at
	0.88	0.75	Q9Y4B5	238496_at
	1.05	0.87		238495_at
TRAF3IP1	0.77	0.73		238494_at
ZNF506	0.84	1.1		238493_at
KIAA2026	1.28	0.69	A8MYM3 /// B3KVL3 /// Q6ZME9 /// Q86UE3	238490_at
	0.95	0.8		238484_s_at
KLF7	1.01	1.39	B4DT91 /// Q8IZU9	238482_at
TTC39C	1.13	1.18		238480_at
	0.69	0.87		238479_at
BNC2	2.31	1.4		238478_at
	0.67	0.84		238477_at
C5orf41	0.98	0.98	O95178 /// Q9Y6T4	238476_at
FBXO9	1	0.67		238472_at
SYS1	0.88	1.11		238470_at
OGFRL1	0.8	0.9		238469_at
TNRC6B	1.03	0.88		238468_at
C5orf35	0.39	0.3	A0PJN8 /// B3KX39 /// P16157 /// Q53ER1 /// Q6PK32	238465_at
LOC100134365	0.67	0.76	A8MPQ9 /// Q5U5X0	238464_at
UBASH3B	0.29	0.78		238462_at
EFHA2	0.89	1.06		238458_at
	1.05	0.82		238456_at
FCRLB	1.09	1.02		238452_at
LOC595101	1.47	1.09	A2A2X9 /// Q0P6D0 /// Q8N5I3	238449_at
MRPL19	0.63	0.68	A8K9C3 /// B4DVA1 /// B7ZLL1 /// Q0VGC6 /// Q17RX7 /// Q5TZT2 /// Q9NS23	238448_at
RBMS3	1.06	1.15		238447_at
SMA4	0.98	1.59		238446_at
ZNF618	0.58	0.79		238444_at
ZNF805	0.91	1.32	B4DUW5 /// B4E1M9 /// B4E1N0 /// B7Z9E2 /// O75674 /// Q8N749 /// Q8NI65	238437_at
ZNF805	0.86	1.04	B3KPR2 /// B4DM15 /// B7ZLP3 /// O43155	238436_s_at
CA5BP	0.87	1.15		238435_at
SMCR8	1.11	0.83		238434_at
	0.87	1.13		238431_at
[truncated: 18,745 more rows]
